# Supplementary material
Source: publisher figshare collection journal article supplement (https://acs.figshare.com/ndownloader/files/3837163)
Supplement: Supplementary file 1 [file 3837163]

 
data_Cs4U4W3O23
 
_audit_creation_method            SHELXL-97
_chemical_name_systematic
;
 ?
;
_chemical_name_common             ?
_chemical_melting_point           ?
_chemical_formula_moiety          ?
_chemical_formula_sum
 'Cs4 O23 U4 W3'
_chemical_formula_weight          2403.31
 
loop_
 _atom_type_symbol
 _atom_type_description
 _atom_type_scat_dispersion_real
 _atom_type_scat_dispersion_imag
 _atom_type_scat_source
 'Cs'  'Cs'  -0.3680   2.1192
 'International Tables Vol C Tables 4.2.6.8 and 6.1.1.4'
 'O'  'O'   0.0106   0.0060
 'International Tables Vol C Tables 4.2.6.8 and 6.1.1.4'
 'U'  'U'  -9.6767   9.6646
 'International Tables Vol C Tables 4.2.6.8 and 6.1.1.4'
 'W'  'W'  -0.8490   6.8722
 'International Tables Vol C Tables 4.2.6.8 and 6.1.1.4'
 
_symmetry_cell_setting            monoclinic
_symmetry_space_group_name_H-M    "P21/c"
 
loop_
 _symmetry_equiv_pos_as_xyz
 'x, y, z'
 '-x, y+1/2, -z+1/2'
 '-x, -y, -z'
 'x, -y-1/2, z-1/2'
 
_cell_length_a                    8.1990(4)
_cell_length_b                    32.8343(10)
_cell_length_c                    10.7529(6)
_cell_angle_alpha                 90.00
_cell_angle_beta                  117.594(4)
_cell_angle_gamma                 90.00
_cell_volume                      2565.5(2)
_cell_formula_units_Z             4
_cell_measurement_temperature     293(2)
_cell_measurement_reflns_used     4246
_cell_measurement_theta_min       2.8951
_cell_measurement_theta_max       34.7403
 
_exptl_crystal_description
;
 ?
;
_exptl_crystal_colour
;
 ?
;
_exptl_crystal_size_max           0.1
_exptl_crystal_size_mid           0.08
_exptl_crystal_size_min           0.06
_exptl_crystal_density_meas       ?
_exptl_crystal_density_diffrn     6.222
_exptl_crystal_density_method     'not measured'
_exptl_crystal_F_000              3976
_exptl_absorpt_coefficient_mu     44.228
_exptl_absorpt_correction_type    multi-scan
_exptl_absorpt_correction_T_min   0.59793
_exptl_absorpt_correction_T_max   1.00000
_exptl_absorpt_process_details
;
 ?
;
 
_exptl_special_details
;
 ?
;
 
_diffrn_ambient_temperature       293(2)
_diffrn_radiation_wavelength      0.71073
_diffrn_radiation_type            MoK\a
_diffrn_radiation_source          'fine-focus sealed tube'
_diffrn_radiation_monochromator   graphite
_diffrn_measurement_device_type   'SuperNova, Dual, Cu at zero, Eos'
_diffrn_measurement_method        '\w scans'
_diffrn_detector_area_resol_mean  15.9834
_diffrn_standards_number          ?
_diffrn_standards_interval_count  ?
_diffrn_standards_interval_time   ?
_diffrn_standards_decay_%         ?
_diffrn_reflns_number             21022
_diffrn_reflns_av_R_equivalents   0.0733
_diffrn_reflns_av_sigmaI/netI     0.0750
_diffrn_reflns_limit_h_min        -9
_diffrn_reflns_limit_h_max        10
_diffrn_reflns_limit_k_min        -43
_diffrn_reflns_limit_k_max        43
_diffrn_reflns_limit_l_min        -14
_diffrn_reflns_limit_l_max        14
_diffrn_reflns_theta_min          2.90
_diffrn_reflns_theta_max          27.88
_reflns_number_total              6114
_reflns_number_gt                 4667
_reflns_threshold_expression      >2sigma(I)
 
_computing_data_collection
;
 ?
;
_computing_cell_refinement
;
 ?
;
_computing_data_reduction
;
 ?
;
_computing_structure_solution     'SHELXS-97 (Sheldrick, 1990)'
_computing_structure_refinement   'SHELXL-97 (Sheldrick, 1997)'
_computing_molecular_graphics     ?
_computing_publication_material   ?
 
_refine_special_details
;
 Refinement of F^2^ against ALL reflections.  The weighted R-factor wR and
 goodness of fit S are based on F^2^, conventional R-factors R are based
 on F, with F set to zero for negative F^2^. The threshold expression of
 F^2^ > 2sigma(F^2^) is used only for calculating R-factors(gt) etc. and is
 not relevant to the choice of reflections for refinement.  R-factors based
 on F^2^ are statistically about twice as large as those based on F, and R-
 factors based on ALL data will be even larger.
;
 
_refine_ls_structure_factor_coef  Fsqd
_refine_ls_matrix_type            full
_refine_ls_weighting_scheme       calc
_refine_ls_weighting_details
 'calc w=1/[\s^2^(Fo^2^)+(0.0151P)^2^+0.0000P] where P=(Fo^2^+2Fc^2^)/3'
_atom_sites_solution_primary      direct
_atom_sites_solution_secondary    difmap
_atom_sites_solution_hydrogens    .
_refine_ls_hydrogen_treatment     .
_refine_ls_extinction_method      none
_refine_ls_extinction_coef        0.000051(5)
_refine_ls_number_reflns          6114
_refine_ls_number_parameters      307
_refine_ls_number_restraints      138
_refine_ls_R_factor_all           0.0623
_refine_ls_R_factor_gt            0.0392
_refine_ls_wR_factor_ref          0.0673
_refine_ls_wR_factor_gt           0.0610
_refine_ls_goodness_of_fit_ref    0.960
_refine_ls_restrained_S_all       0.950
_refine_ls_shift/su_max           0.001
_refine_ls_shift/su_mean          0.000
 
loop_
 _atom_site_label
 _atom_site_type_symbol
 _atom_site_fract_x
 _atom_site_fract_y
 _atom_site_fract_z
 _atom_site_U_iso_or_equiv
 _atom_site_adp_type
 _atom_site_occupancy
 _atom_site_symmetry_multiplicity
 _atom_site_calc_flag
 _atom_site_refinement_flags
 _atom_site_disorder_assembly
 _atom_site_disorder_group
U1 U -0.25677(8) -0.178405(14) -0.68377(5) 0.00896(11) Uani 1 1 d . . .
U2 U -0.31357(8) -0.118464(14) -0.31526(5) 0.00919(11) Uani 1 1 d . . .
U3 U -0.38838(8) -0.090326(14) -0.95405(5) 0.00924(11) Uani 1 1 d . . .
U4 U -0.29641(7) -0.193561(14) -1.05038(5) 0.00867(11) Uani 1 1 d . . .
W1 W -0.18140(8) -0.216184(15) -0.36342(5) 0.00843(12) Uani 1 1 d . . .
W2 W -0.23428(8) -0.057266(15) -0.60600(6) 0.00954(12) Uani 1 1 d . . .
W3 W -0.46093(9) -0.008930(15) -0.22857(6) 0.01212(12) Uani 1 1 d . . .
O1 O -0.2191(13) -0.1642(2) -0.4538(9) 0.0094(19) Uani 1 1 d U . .
O2 O -0.2701(14) -0.2332(2) -0.8412(9) 0.011(2) Uani 1 1 d U . .
O3 O -0.3884(13) -0.1277(2) -0.1424(9) 0.0085(19) Uani 1 1 d U . .
O4 O -0.3804(14) -0.0377(3) -0.7994(10) 0.014(2) Uani 1 1 d U . .
O5 O -0.2122(15) -0.0779(3) -0.4443(10) 0.018(2) Uani 1 1 d U . .
O6 O -0.0079(14) -0.1749(3) -0.6118(10) 0.017(2) Uani 1 1 d U . .
O7 O -0.2138(13) -0.2364(2) -0.5395(9) 0.011(2) Uani 1 1 d U . .
O8 O -0.2989(14) -0.1911(3) -0.2672(10) 0.013(2) Uani 1 1 d U . .
O9 O -0.1587(15) -0.0736(3) -0.9124(11) 0.020(2) Uani 1 1 d U . .
O10 O -0.3675(15) -0.0099(3) -0.5891(10) 0.019(2) Uani 1 1 d U . .
O11 O -0.5225(14) -0.0384(3) -1.1162(10) 0.016(2) Uani 1 1 d U . .
O12 O 0.0523(15) -0.2170(3) -0.2531(11) 0.022(2) Uani 1 1 d U . .
O13 O -0.5017(15) -0.1830(3) -0.7463(11) 0.021(2) Uani 1 1 d U . .
O14 O -0.2999(15) -0.1543(3) -0.8873(10) 0.018(2) Uani 1 1 d U . .
O15 O -0.0511(14) -0.1845(3) -0.9728(10) 0.016(2) Uani 1 1 d U . .
O16 O -0.3783(14) -0.0510(3) -0.2905(10) 0.019(2) Uani 1 1 d U . .
O17 O -0.0771(14) -0.1135(3) -0.1854(10) 0.017(2) Uani 1 1 d U . .
O18 O -0.5388(15) -0.2076(3) -1.1337(11) 0.020(2) Uani 1 1 d U . .
O19 O -0.2842(15) -0.1065(3) -0.6961(11) 0.023(2) Uani 1 1 d U . .
O20 O -0.0147(17) -0.0443(3) -0.5711(12) 0.031(3) Uani 1 1 d U . .
O21 O -0.2627(15) 0.0195(3) -0.1413(11) 0.024(2) Uani 1 1 d U . .
O22 O -0.6216(15) -0.1049(3) -0.9959(11) 0.021(2) Uani 1 1 d U . .
O23 O -0.5466(16) -0.1243(3) -0.4519(11) 0.024(2) Uani 1 1 d U . .
Cs1 Cs 0.18785(14) -0.12911(3) -0.31658(10) 0.0240(2) Uani 1 1 d . . .
Cs2 Cs 0.05223(15) -0.01887(3) -0.18581(11) 0.0246(2) Uani 1 1 d . . .
Cs3 Cs 0.26038(16) -0.25079(3) -0.45263(11) 0.0293(2) Uani 1 1 d . . .
Cs4 Cs 0.20541(16) -0.11536(3) -0.78815(12) 0.0306(2) Uani 1 1 d . . .
 
loop_
 _atom_site_aniso_label
 _atom_site_aniso_U_11
 _atom_site_aniso_U_22
 _atom_site_aniso_U_33
 _atom_site_aniso_U_23
 _atom_site_aniso_U_13
 _atom_site_aniso_U_12
U1 0.0116(3) 0.0087(2) 0.0050(2) 0.00086(18) 0.0025(2) 0.0009(2)
U2 0.0113(3) 0.0087(2) 0.0070(2) 0.00088(18) 0.0038(2) 0.0015(2)
U3 0.0116(3) 0.0081(2) 0.0067(2) 0.00071(18) 0.0031(2) 0.0020(2)
U4 0.0120(3) 0.0074(2) 0.0064(2) -0.00010(18) 0.0040(2) -0.0001(2)
W1 0.0116(3) 0.0071(2) 0.0057(2) 0.00030(19) 0.0033(2) 0.0005(2)
W2 0.0125(3) 0.0084(2) 0.0062(3) 0.0006(2) 0.0030(2) 0.0009(2)
W3 0.0158(3) 0.0092(3) 0.0113(3) 0.0020(2) 0.0062(3) 0.0045(2)
O1 0.010(2) 0.009(2) 0.009(2) -0.0003(10) 0.0042(12) 0.0004(10)
O2 0.012(2) 0.011(2) 0.011(2) 0.0000(10) 0.0054(13) -0.0001(10)
O3 0.009(2) 0.008(2) 0.008(2) 0.0000(10) 0.0036(12) 0.0002(10)
O4 0.014(2) 0.014(2) 0.014(2) 0.0000(10) 0.0062(13) 0.0007(10)
O5 0.019(2) 0.018(2) 0.018(2) 0.0006(10) 0.0085(13) -0.0004(10)
O6 0.017(2) 0.017(2) 0.017(2) 0.0003(10) 0.0079(13) -0.0003(10)
O7 0.011(2) 0.011(2) 0.011(2) -0.0004(10) 0.0052(13) 0.0001(10)
O8 0.013(2) 0.014(2) 0.013(2) -0.0005(10) 0.0064(13) 0.0003(10)
O9 0.020(2) 0.020(2) 0.020(2) 0.0000(10) 0.0089(14) 0.0001(10)
O10 0.019(2) 0.019(2) 0.019(2) -0.0005(10) 0.0086(14) 0.0011(10)
O11 0.016(2) 0.016(2) 0.016(2) 0.0002(10) 0.0075(13) 0.0004(10)
O12 0.022(3) 0.022(3) 0.022(2) -0.0001(10) 0.0102(14) 0.0000(10)
O13 0.020(2) 0.021(2) 0.020(2) -0.0003(10) 0.0093(14) 0.0003(10)
O14 0.018(2) 0.017(2) 0.017(2) -0.0001(10) 0.0082(13) 0.0005(10)
O15 0.016(2) 0.016(2) 0.016(2) -0.0002(10) 0.0077(13) 0.0002(10)
O16 0.019(2) 0.019(2) 0.018(2) -0.0001(10) 0.0089(14) 0.0002(10)
O17 0.017(2) 0.017(2) 0.017(2) 0.0002(10) 0.0077(13) -0.0001(10)
O18 0.020(2) 0.020(2) 0.020(2) -0.0001(10) 0.0094(14) 0.0003(10)
O19 0.023(3) 0.022(3) 0.022(3) 0.0001(10) 0.0101(14) 0.0002(10)
O20 0.031(3) 0.032(3) 0.031(3) 0.0006(10) 0.0147(15) -0.0007(10)
O21 0.023(3) 0.023(3) 0.024(3) -0.0005(10) 0.0109(14) 0.0002(10)
O22 0.021(2) 0.022(2) 0.021(2) 0.0001(10) 0.0100(14) -0.0004(10)
O23 0.024(3) 0.024(3) 0.023(3) -0.0002(10) 0.0110(14) 0.0002(10)
Cs1 0.0123(5) 0.0369(6) 0.0206(5) -0.0093(4) 0.0058(4) -0.0046(4)
Cs2 0.0241(6) 0.0219(5) 0.0292(6) -0.0064(4) 0.0136(5) -0.0063(4)
Cs3 0.0233(6) 0.0332(6) 0.0217(5) 0.0006(4) 0.0021(5) 0.0073(5)
Cs4 0.0210(6) 0.0296(5) 0.0343(6) 0.0002(5) 0.0070(5) 0.0050(5)
 
_geom_special_details
;
 All esds (except the esd in the dihedral angle between two l.s. planes)
 are estimated using the full covariance matrix.  The cell esds are taken
 into account individually in the estimation of esds in distances, angles
 and torsion angles; correlations between esds in cell parameters are only
 used when they are defined by crystal symmetry.  An approximate (isotropic)
 treatment of cell esds is used for estimating esds involving l.s. planes.
;
 
loop_
 _geom_bond_atom_site_label_1
 _geom_bond_atom_site_label_2
 _geom_bond_distance
 _geom_bond_site_symmetry_2
 _geom_bond_publ_flag
U1 O13 1.805(11) . ?
U1 O6 1.820(10) . ?
U1 O14 2.196(9) . ?
U1 O19 2.368(9) . ?
U1 O7 2.376(8) . ?
U1 O1 2.392(8) . ?
U1 O2 2.437(8) . ?
U1 W1 3.4373(7) . ?
U1 U4 3.8348(7) . ?
U1 U3 3.8819(7) . ?
U1 Cs1 4.2620(12) . ?
U1 Cs3 4.3396(12) 4_455 ?
U2 O17 1.797(11) . ?
U2 O23 1.801(12) . ?
U2 O3 2.231(8) . ?
U2 O16 2.321(9) . ?
U2 O5 2.336(9) . ?
U2 O8 2.433(8) . ?
U2 O1 2.479(8) . ?
U2 W1 3.5010(7) . ?
U2 U4 3.7204(7) 1_556 ?
U2 Cs1 4.0962(11) 1_455 ?
U2 Cs1 4.1325(11) . ?
U2 Cs2 4.2141(11) . ?
U3 O9 1.808(10) . ?
U3 O22 1.814(11) . ?
U3 O14 2.228(9) . ?
U3 O11 2.320(9) . ?
U3 O3 2.368(8) 1_554 ?
U3 O4 2.378(9) . ?
U3 O19 2.552(10) . ?
U3 W2 3.5215(7) . ?
U3 U4 3.7222(7) . ?
U3 Cs1 4.0426(12) 1_454 ?
U3 Cs2 4.3442(11) 3_554 ?
U4 O15 1.810(10) . ?
U4 O18 1.821(11) . ?
U4 O14 2.189(9) . ?
U4 O8 2.323(9) 1_554 ?
U4 O3 2.353(8) 1_554 ?
U4 O7 2.386(8) 4 ?
U4 O2 2.519(8) . ?
U4 W1 3.4578(7) 4 ?
U4 U2 3.7205(7) 1_554 ?
U4 Cs1 4.3977(12) 1_454 ?
W1 O12 1.724(11) . ?
W1 O2 1.874(8) 4_556 ?
W1 O8 1.897(9) . ?
W1 O7 1.905(9) . ?
W1 O1 1.915(8) . ?
W1 U4 3.4578(7) 4_556 ?
W1 Cs1 4.0226(11) . ?
W1 Cs3 4.3071(12) . ?
W1 Cs3 4.3572(13) 4_556 ?
W1 Cs3 4.3694(13) 1_455 ?
W2 O20 1.714(12) . ?
W2 O5 1.795(9) . ?
W2 O19 1.832(10) . ?
W2 O10 1.956(9) . ?
W2 O4 1.966(9) . ?
W2 W3 3.1647(8) 3_454 ?
W2 Cs2 4.0723(11) 3_554 ?
W2 Cs1 4.1533(12) . ?
W2 Cs2 4.2058(12) . ?
W2 Cs4 4.4992(13) 1_455 ?
W3 O21 1.727(11) . ?
W3 O11 1.794(9) 1_556 ?
W3 O16 1.797(9) . ?
W3 O10 1.911(10) 3_454 ?
W3 O4 2.118(9) 3_454 ?
W3 W2 3.1646(8) 3_454 ?
W3 Cs2 4.0284(12) . ?
W3 Cs2 4.2368(12) 1_455 ?
W3 Cs2 4.2525(13) 3 ?
O1 Cs1 3.175(9) . ?
O2 W1 1.874(8) 4 ?
O2 Cs3 3.502(10) 4_455 ?
O3 U4 2.353(8) 1_556 ?
O3 U3 2.368(8) 1_556 ?
O3 Cs1 3.091(9) 1_455 ?
O4 W3 2.118(9) 3_454 ?
O4 Cs2 3.333(9) 3_554 ?
O5 Cs2 3.256(10) . ?
O5 Cs1 3.362(10) . ?
O6 Cs1 3.193(10) . ?
O6 Cs3 3.238(9) . ?
O6 Cs4 3.682(9) . ?
O7 U4 2.386(8) 4_556 ?
O7 Cs3 3.585(10) . ?
O8 U4 2.324(9) 1_556 ?
O8 Cs3 3.767(10) 1_455 ?
O9 Cs4 2.980(10) . ?
O9 Cs2 3.201(9) 3_554 ?
O10 W3 1.911(10) 3_454 ?
O11 W3 1.793(9) 1_554 ?
O11 Cs2 3.272(10) 1_454 ?
O11 Cs1 3.797(9) 1_454 ?
O12 Cs3 3.060(10) 4_556 ?
O12 Cs1 3.275(9) . ?
O12 Cs3 3.484(10) . ?
O13 Cs3 3.073(10) 4_455 ?
O13 Cs4 3.146(10) 1_455 ?
O15 Cs4 3.107(9) . ?
O15 Cs3 3.250(9) 4 ?
O16 Cs2 3.341(10) . ?
O17 Cs1 3.131(9) . ?
O17 Cs2 3.284(9) . ?
O17 Cs4 3.802(10) 1_556 ?
O18 Cs3 3.354(10) 1_454 ?
O18 Cs3 3.367(10) 4_455 ?
O18 Cs1 3.384(10) 1_454 ?
O20 Cs2 3.238(11) 3_554 ?
O20 Cs1 3.713(11) . ?
O21 Cs2 3.104(10) . ?
O21 Cs2 3.118(11) 3 ?
O21 Cs4 3.321(10) 3_554 ?
O22 Cs1 3.158(10) 1_454 ?
O22 Cs4 3.171(10) 1_455 ?
O22 Cs2 3.774(10) 1_454 ?
O23 Cs1 3.134(10) 1_455 ?
O23 Cs4 3.238(11) 1_455 ?
Cs1 O3 3.091(10) 1_655 ?
Cs1 O23 3.134(10) 1_655 ?
Cs1 O22 3.158(10) 1_656 ?
Cs1 O18 3.384(10) 1_656 ?
Cs1 O11 3.797(9) 1_656 ?
Cs2 O21 3.118(11) 3 ?
Cs2 O9 3.201(9) 3_554 ?
Cs2 O20 3.238(11) 3_554 ?
Cs2 O11 3.272(10) 1_656 ?
Cs2 O4 3.333(9) 3_554 ?
Cs2 O22 3.774(10) 1_656 ?
Cs2 W2 4.0723(11) 3_554 ?
Cs3 O12 3.060(11) 4 ?
Cs3 O13 3.073(10) 4_656 ?
Cs3 O15 3.250(9) 4_556 ?
Cs3 O18 3.354(10) 1_656 ?
Cs3 O18 3.367(10) 4_656 ?
Cs3 O2 3.501(10) 4_656 ?
Cs3 O8 3.767(10) 1_655 ?
Cs3 U1 4.3396(12) 4_656 ?
Cs4 O13 3.146(10) 1_655 ?
Cs4 O22 3.171(10) 1_655 ?
Cs4 O23 3.238(11) 1_655 ?
Cs4 O21 3.321(10) 3_554 ?
Cs4 O17 3.802(10) 1_554 ?
Cs4 W2 4.4993(13) 1_655 ?
Cs4 U1 4.5171(12) 1_655 ?
Cs4 U3 4.5227(12) 1_655 ?
 
loop_
 _geom_angle_atom_site_label_1
 _geom_angle_atom_site_label_2
 _geom_angle_atom_site_label_3
 _geom_angle
 _geom_angle_site_symmetry_1
 _geom_angle_site_symmetry_3
 _geom_angle_publ_flag
O13 U1 O6 176.9(4) . . ?
O13 U1 O14 91.2(4) . . ?
O6 U1 O14 91.9(4) . . ?
O13 U1 O19 90.1(4) . . ?
O6 U1 O19 91.2(4) . . ?
O14 U1 O19 67.5(3) . . ?
O13 U1 O7 88.8(4) . . ?
O6 U1 O7 88.5(4) . . ?
O14 U1 O7 147.8(3) . . ?
O19 U1 O7 144.7(3) . . ?
O13 U1 O1 89.4(4) . . ?
O6 U1 O1 88.0(4) . . ?
O14 U1 O1 147.6(3) . . ?
O19 U1 O1 80.1(3) . . ?
O7 U1 O1 64.6(3) . . ?
O13 U1 O2 89.7(4) . . ?
O6 U1 O2 91.3(4) . . ?
O14 U1 O2 68.9(3) . . ?
O19 U1 O2 136.4(3) . . ?
O7 U1 O2 78.9(3) . . ?
O1 U1 O2 143.6(3) . . ?
O13 U1 W1 89.8(3) . . ?
O6 U1 W1 87.2(3) . . ?
O14 U1 W1 179.0(3) . . ?
O19 U1 W1 112.6(2) . . ?
O7 U1 W1 32.1(2) . . ?
O1 U1 W1 32.51(19) . . ?
O2 U1 W1 111.1(2) . . ?
O13 U1 U4 93.2(3) . . ?
O6 U1 U4 89.4(3) . . ?
O14 U1 U4 29.0(2) . . ?
O19 U1 U4 96.4(2) . . ?
O7 U1 U4 118.9(2) . . ?
O1 U1 U4 175.6(2) . . ?
O2 U1 U4 40.1(2) . . ?
W1 U1 U4 150.886(18) . . ?
O13 U1 U3 84.7(3) . . ?
O6 U1 U3 98.0(3) . . ?
O14 U1 U3 28.9(2) . . ?
O19 U1 U3 39.6(2) . . ?
O7 U1 U3 172.4(2) . . ?
O1 U1 U3 119.17(19) . . ?
O2 U1 U3 97.0(2) . . ?
W1 U1 U3 151.371(17) . . ?
U4 U1 U3 57.674(12) . . ?
O13 U1 Cs1 134.7(3) . . ?
O6 U1 Cs1 43.3(3) . . ?
O14 U1 Cs1 117.4(3) . . ?
O19 U1 Cs1 72.0(3) . . ?
O7 U1 Cs1 84.0(2) . . ?
O1 U1 Cs1 47.4(2) . . ?
O2 U1 Cs1 131.9(2) . . ?
W1 U1 Cs1 61.905(18) . . ?
U4 U1 Cs1 129.08(2) . . ?
U3 U1 Cs1 103.443(19) . . ?
O13 U1 Cs3 36.2(3) . 4_455 ?
O6 U1 Cs3 144.5(3) . 4_455 ?
O14 U1 Cs3 81.6(3) . 4_455 ?
O19 U1 Cs3 117.6(3) . 4_455 ?
O7 U1 Cs3 79.6(2) . 4_455 ?
O1 U1 Cs3 115.7(2) . 4_455 ?
O2 U1 Cs3 53.7(2) . 4_455 ?
W1 U1 Cs3 99.17(2) . 4_455 ?
U4 U1 Cs3 68.216(18) . 4_455 ?
U3 U1 Cs3 92.804(19) . 4_455 ?
Cs1 U1 Cs3 161.00(2) . 4_455 ?
O17 U2 O23 177.0(4) . . ?
O17 U2 O3 88.8(4) . . ?
O23 U2 O3 93.9(4) . . ?
O17 U2 O16 92.7(4) . . ?
O23 U2 O16 89.0(4) . . ?
O3 U2 O16 82.4(3) . . ?
O17 U2 O5 81.8(4) . . ?
O23 U2 O5 96.4(4) . . ?
O3 U2 O5 152.0(3) . . ?
O16 U2 O5 71.8(3) . . ?
O17 U2 O8 89.7(4) . . ?
O23 U2 O8 89.9(4) . . ?
O3 U2 O8 72.3(3) . . ?
O16 U2 O8 154.5(3) . . ?
O5 U2 O8 133.6(3) . . ?
O17 U2 O1 89.8(4) . . ?
O23 U2 O1 87.3(4) . . ?
O3 U2 O1 134.5(3) . . ?
O16 U2 O1 143.1(3) . . ?
O5 U2 O1 72.1(3) . . ?
O8 U2 O1 62.2(3) . . ?
O17 U2 W1 84.3(3) . . ?
O23 U2 W1 93.8(3) . . ?
O3 U2 W1 102.8(2) . . ?
O16 U2 W1 173.8(2) . . ?
O5 U2 W1 102.4(2) . . ?
O8 U2 W1 31.2(2) . . ?
O1 U2 W1 31.92(19) . . ?
O17 U2 U4 79.7(3) . 1_556 ?
O23 U2 U4 101.7(3) . 1_556 ?
O3 U2 U4 36.9(2) . 1_556 ?
O16 U2 U4 118.3(2) . 1_556 ?
O5 U2 U4 159.2(3) . 1_556 ?
O8 U2 U4 37.5(2) . 1_556 ?
O1 U2 U4 98.42(19) . 1_556 ?
W1 U2 U4 66.504(14) . 1_556 ?
O17 U2 Cs1 136.6(3) . 1_455 ?
O23 U2 Cs1 46.3(3) . 1_455 ?
O3 U2 Cs1 48.1(2) . 1_455 ?
O16 U2 Cs1 78.5(2) . 1_455 ?
O5 U2 Cs1 132.5(3) . 1_455 ?
O8 U2 Cs1 82.4(2) . 1_455 ?
O1 U2 Cs1 122.4(2) . 1_455 ?
W1 U2 Cs1 107.34(2) . 1_455 ?
U4 U2 Cs1 68.278(19) 1_556 1_455 ?
O17 U2 Cs1 45.0(3) . . ?
O23 U2 Cs1 132.0(3) . . ?
O3 U2 Cs1 130.5(2) . . ?
O16 U2 Cs1 111.2(2) . . ?
O5 U2 Cs1 54.4(3) . . ?
O8 U2 Cs1 88.1(2) . . ?
O1 U2 Cs1 50.1(2) . . ?
W1 U2 Cs1 62.963(18) . . ?
U4 U2 Cs1 105.17(2) 1_556 . ?
Cs1 U2 Cs1 170.25(3) 1_455 . ?
O17 U2 Cs2 47.7(3) . . ?
O23 U2 Cs2 132.5(3) . . ?
O3 U2 Cs2 105.0(2) . . ?
O16 U2 Cs2 52.2(3) . . ?
O5 U2 Cs2 50.1(2) . . ?
O8 U2 Cs2 137.2(2) . . ?
O1 U2 Cs2 107.2(2) . . ?
W1 U2 Cs2 122.57(2) . . ?
U4 U2 Cs2 119.52(2) 1_556 . ?
Cs1 U2 Cs2 128.59(2) 1_455 . ?
Cs1 U2 Cs2 60.65(2) . . ?
O9 U3 O22 177.6(4) . . ?
O9 U3 O14 93.4(4) . . ?
O22 U3 O14 88.8(4) . . ?
O9 U3 O11 92.3(4) . . ?
O22 U3 O11 85.9(4) . . ?
O14 U3 O11 154.8(3) . . ?
O9 U3 O3 87.5(4) . 1_554 ?
O22 U3 O3 94.0(4) . 1_554 ?
O14 U3 O3 70.1(3) . 1_554 ?
O11 U3 O3 85.8(3) . 1_554 ?
O9 U3 O4 85.3(4) . . ?
O22 U3 O4 92.8(4) . . ?
O14 U3 O4 124.0(3) . . ?
O11 U3 O4 80.8(3) . . ?
O3 U3 O4 164.5(3) 1_554 . ?
O9 U3 O19 90.5(4) . . ?
O22 U3 O19 89.9(4) . . ?
O14 U3 O19 63.8(3) . . ?
O11 U3 O19 140.7(3) . . ?
O3 U3 O19 133.6(3) 1_554 . ?
O4 U3 O19 60.3(3) . . ?
O9 U3 W2 79.8(3) . . ?
O22 U3 W2 99.4(3) . . ?
O14 U3 W2 92.6(2) . . ?
O11 U3 W2 112.6(2) . . ?
O3 U3 W2 157.9(2) 1_554 . ?
O4 U3 W2 32.1(2) . . ?
O19 U3 W2 30.1(2) . . ?
O9 U3 U4 91.3(3) . . ?
O22 U3 U4 91.0(3) . . ?
O14 U3 U4 32.2(2) . . ?
O11 U3 U4 123.2(2) . . ?
O3 U3 U4 37.8(2) 1_554 . ?
O4 U3 U4 155.9(2) . . ?
O19 U3 U4 95.9(2) . . ?
W2 U3 U4 123.867(18) . . ?
O9 U3 U1 98.3(3) . . ?
O22 U3 U1 83.4(3) . . ?
O14 U3 U1 28.5(2) . . ?
O11 U3 U1 168.8(2) . . ?
O3 U3 U1 98.31(19) 1_554 . ?
O4 U3 U1 96.3(2) . . ?
O19 U3 U1 36.3(2) . . ?
W2 U3 U1 66.141(14) . . ?
U4 U3 U1 60.529(12) . . ?
O9 U3 Cs1 131.8(3) . 1_454 ?
O22 U3 Cs1 48.8(3) . 1_454 ?
O14 U3 Cs1 91.2(3) . 1_454 ?
O11 U3 Cs1 67.1(2) . 1_454 ?
O3 U3 Cs1 49.6(2) 1_554 1_454 ?
O4 U3 Cs1 129.5(2) . 1_454 ?
O19 U3 Cs1 133.5(2) . 1_454 ?
W2 U3 Cs1 147.88(2) . 1_454 ?
U4 U3 Cs1 68.852(18) . 1_454 ?
U1 U3 Cs1 107.70(2) . 1_454 ?
O9 U3 Cs2 40.8(3) . 3_554 ?
O22 U3 Cs2 136.9(3) . 3_554 ?
O14 U3 Cs2 127.3(3) . 3_554 ?
O11 U3 Cs2 70.0(2) . 3_554 ?
O3 U3 Cs2 118.2(2) 1_554 3_554 ?
O4 U3 Cs2 49.5(2) . 3_554 ?
O19 U3 Cs2 87.5(2) . 3_554 ?
W2 U3 Cs2 61.308(18) . 3_554 ?
U4 U3 Cs2 132.07(2) . 3_554 ?
U1 U3 Cs2 116.35(2) . 3_554 ?
Cs1 U3 Cs2 135.88(2) 1_454 3_554 ?
O15 U4 O18 174.3(4) . . ?
O15 U4 O14 87.6(4) . . ?
O18 U4 O14 97.3(4) . . ?
O15 U4 O8 87.0(4) . 1_554 ?
O18 U4 O8 90.8(4) . 1_554 ?
O14 U4 O8 141.9(3) . 1_554 ?
O15 U4 O3 96.6(4) . 1_554 ?
O18 U4 O3 87.8(4) . 1_554 ?
O14 U4 O3 71.0(3) . 1_554 ?
O8 U4 O3 72.2(3) 1_554 1_554 ?
O15 U4 O7 84.6(4) . 4 ?
O18 U4 O7 90.0(4) . 4 ?
O14 U4 O7 129.7(3) . 4 ?
O8 U4 O7 87.3(3) 1_554 4 ?
O3 U4 O7 159.3(3) 1_554 4 ?
O15 U4 O2 93.2(4) . . ?
O18 U4 O2 86.1(4) . . ?
O14 U4 O2 67.4(3) . . ?
O8 U4 O2 150.6(3) 1_554 . ?
O3 U4 O2 136.7(3) 1_554 . ?
O7 U4 O2 63.5(3) 4 . ?
O15 U4 W1 85.8(3) . 4 ?
O18 U4 W1 90.6(3) . 4 ?
O14 U4 W1 98.1(2) . 4 ?
O8 U4 W1 119.1(2) 1_554 4 ?
O3 U4 W1 168.6(2) 1_554 4 ?
O7 U4 W1 31.8(2) 4 4 ?
O2 U4 W1 31.91(19) . 4 ?
O15 U4 U2 83.3(3) . 1_554 ?
O18 U4 U2 98.4(3) . 1_554 ?
O14 U4 U2 102.3(2) . 1_554 ?
O8 U4 U2 39.6(2) 1_554 1_554 ?
O3 U4 U2 34.7(2) 1_554 1_554 ?
O7 U4 U2 125.9(2) 4 1_554 ?
O2 U4 U2 169.36(19) . 1_554 ?
W1 U4 U2 156.427(19) 4 1_554 ?
O15 U4 U3 92.7(3) . . ?
O18 U4 U3 93.0(3) . . ?
O14 U4 U3 32.9(2) . . ?
O8 U4 U3 109.8(2) 1_554 . ?
O3 U4 U3 38.1(2) 1_554 . ?
O7 U4 U3 162.6(2) 4 . ?
O2 U4 U3 99.56(19) . . ?
W1 U4 U3 130.881(17) 4 . ?
U2 U4 U3 70.658(13) 1_554 . ?
O15 U4 U1 87.6(3) . . ?
O18 U4 U1 95.3(3) . . ?
O14 U4 U1 29.1(2) . . ?
O8 U4 U1 169.8(2) 1_554 . ?
O3 U4 U1 99.9(2) 1_554 . ?
O7 U4 U1 100.8(2) 4 . ?
O2 U4 U1 38.53(19) . . ?
W1 U4 U1 69.090(14) 4 . ?
U2 U4 U1 131.005(16) 1_554 . ?
U3 U4 U1 61.797(12) . . ?
O15 U4 Cs1 138.5(3) . 1_454 ?
O18 U4 Cs1 45.6(3) . 1_454 ?
O14 U4 Cs1 82.7(3) . 1_454 ?
O8 U4 Cs1 76.8(2) 1_554 1_454 ?
O3 U4 Cs1 42.2(2) 1_554 1_454 ?
O7 U4 Cs1 131.4(2) 4 1_454 ?
O2 U4 Cs1 119.2(2) . 1_454 ?
W1 U4 Cs1 135.39(2) 4 1_454 ?
U2 U4 Cs1 59.917(17) 1_554 1_454 ?
U3 U4 Cs1 59.019(17) . 1_454 ?
U1 U4 Cs1 101.816(19) . 1_454 ?
O12 W1 O2 105.8(4) . 4_556 ?
O12 W1 O8 108.3(4) . . ?
O2 W1 O8 89.4(4) 4_556 . ?
O12 W1 O7 106.1(4) . . ?
O2 W1 O7 86.2(4) 4_556 . ?
O8 W1 O7 145.1(4) . . ?
O12 W1 O1 103.2(4) . . ?
O2 W1 O1 150.9(4) 4_556 . ?
O8 W1 O1 83.5(4) . . ?
O7 W1 O1 83.7(3) . . ?
O12 W1 U1 108.8(3) . . ?
O2 W1 U1 123.2(3) 4_556 . ?
O8 W1 U1 119.3(3) . . ?
O7 W1 U1 41.6(2) . . ?
O1 W1 U1 42.1(2) . . ?
O12 W1 U4 107.7(3) . 4_556 ?
O2 W1 U4 45.3(3) 4_556 4_556 ?
O8 W1 U4 128.2(3) . 4_556 ?
O7 W1 U4 41.3(2) . 4_556 ?
O1 W1 U4 122.1(3) . 4_556 ?
U1 W1 U4 81.524(16) . 4_556 ?
O12 W1 U2 103.5(3) . . ?
O2 W1 U2 129.0(3) 4_556 . ?
O8 W1 U2 41.6(3) . . ?
O7 W1 U2 123.8(3) . . ?
O1 W1 U2 43.2(2) . . ?
U1 W1 U2 83.869(16) . . ?
U4 W1 U2 148.40(2) 4_556 . ?
O12 W1 Cs1 52.6(3) . . ?
O2 W1 Cs1 158.2(3) 4_556 . ?
O8 W1 Cs1 99.6(3) . . ?
O7 W1 Cs1 97.0(3) . . ?
O1 W1 Cs1 50.7(3) . . ?
U1 W1 Cs1 69.174(19) . . ?
U4 W1 Cs1 131.96(2) 4_556 . ?
U2 W1 Cs1 66.213(19) . . ?
O12 W1 Cs3 50.8(3) . . ?
O2 W1 Cs3 102.1(3) 4_556 . ?
O8 W1 Cs3 158.1(3) . . ?
O7 W1 Cs3 55.3(3) . . ?
O1 W1 Cs3 94.4(3) . . ?
U1 W1 Cs3 69.595(19) . . ?
U4 W1 Cs3 71.058(19) 4_556 . ?
U2 W1 Cs3 128.65(2) . . ?
Cs1 W1 Cs3 63.48(2) . . ?
O12 W1 Cs3 33.0(3) . 4_556 ?
O2 W1 Cs3 80.8(3) 4_556 4_556 ?
O8 W1 Cs3 87.1(3) . 4_556 ?
O7 W1 Cs3 126.1(3) . 4_556 ?
O1 W1 Cs3 126.8(3) . 4_556 ?
U1 W1 Cs3 141.71(2) . 4_556 ?
U4 W1 Cs3 104.53(2) 4_556 4_556 ?
U2 W1 Cs3 104.30(2) . 4_556 ?
Cs1 W1 Cs3 79.98(2) . 4_556 ?
Cs3 W1 Cs3 76.71(2) . 4_556 ?
O12 W1 Cs3 149.8(3) . 1_455 ?
O2 W1 Cs3 50.8(3) 4_556 1_455 ?
O8 W1 Cs3 59.2(3) . 1_455 ?
O7 W1 Cs3 92.4(3) . 1_455 ?
O1 W1 Cs3 102.3(3) . 1_455 ?
U1 W1 Cs3 100.96(2) . 1_455 ?
U4 W1 Cs3 70.953(19) 4_556 1_455 ?
U2 W1 Cs3 84.625(19) . 1_455 ?
Cs1 W1 Cs3 149.70(2) . 1_455 ?
Cs3 W1 Cs3 141.81(3) . 1_455 ?
Cs3 W1 Cs3 116.89(2) 4_556 1_455 ?
O20 W2 O5 104.9(5) . . ?
O20 W2 O19 106.8(5) . . ?
O5 W2 O19 94.4(4) . . ?
O20 W2 O10 110.9(5) . . ?
O5 W2 O10 91.1(4) . . ?
O19 W2 O10 138.9(5) . . ?
O20 W2 O4 102.4(5) . . ?
O5 W2 O4 152.4(4) . . ?
O19 W2 O4 81.5(4) . . ?
O10 W2 O4 75.3(4) . . ?
O20 W2 W3 115.4(4) . 3_454 ?
O5 W2 W3 120.2(3) . 3_454 ?
O19 W2 W3 112.6(3) . 3_454 ?
O10 W2 W3 34.6(3) . 3_454 ?
O4 W2 W3 41.0(3) . 3_454 ?
O20 W2 U3 97.6(4) . . ?
O5 W2 U3 137.6(3) . . ?
O19 W2 U3 44.2(3) . . ?
O10 W2 U3 113.8(3) . . ?
O4 W2 U3 40.0(2) . . ?
W3 W2 U3 79.232(18) 3_454 . ?
O20 W2 Cs2 49.7(4) . 3_554 ?
O5 W2 Cs2 150.0(3) . 3_554 ?
O19 W2 Cs2 107.5(3) . 3_554 ?
O10 W2 Cs2 85.7(3) . 3_554 ?
O4 W2 Cs2 54.3(3) . 3_554 ?
W3 W2 Cs2 70.40(2) 3_454 3_554 ?
U3 W2 Cs2 69.354(19) . 3_554 ?
O20 W2 Cs1 63.3(4) . . ?
O5 W2 Cs1 52.0(3) . . ?
O19 W2 Cs1 78.4(3) . . ?
O10 W2 Cs1 133.5(3) . . ?
O4 W2 Cs1 150.0(3) . . ?
W3 W2 Cs1 168.03(2) 3_454 . ?
U3 W2 Cs1 112.67(2) . . ?
Cs2 W2 Cs1 111.72(2) 3_554 . ?
O20 W2 Cs2 71.5(4) . . ?
O5 W2 Cs2 46.9(3) . . ?
O19 W2 Cs2 135.2(3) . . ?
O10 W2 Cs2 73.7(3) . . ?
O4 W2 Cs2 143.3(2) . . ?
W3 W2 Cs2 107.50(2) 3_454 . ?
U3 W2 Cs2 168.81(2) . . ?
Cs2 W2 Cs2 104.00(2) 3_554 . ?
Cs1 W2 Cs2 60.55(2) . . ?
O20 W2 Cs4 163.3(4) . 1_455 ?
O5 W2 Cs4 83.5(3) . 1_455 ?
O19 W2 Cs4 57.5(3) . 1_455 ?
O10 W2 Cs4 82.9(3) . 1_455 ?
O4 W2 Cs4 71.3(3) . 1_455 ?
W3 W2 Cs4 70.44(2) 3_454 1_455 ?
U3 W2 Cs4 67.376(19) . 1_455 ?
Cs2 W2 Cs4 125.54(3) 3_554 1_455 ?
Cs1 W2 Cs4 114.45(2) . 1_455 ?
Cs2 W2 Cs4 122.98(2) . 1_455 ?
O21 W3 O11 114.4(5) . 1_556 ?
O21 W3 O16 101.3(5) . . ?
O11 W3 O16 96.2(4) 1_556 . ?
O21 W3 O10 116.3(4) . 3_454 ?
O11 W3 O10 124.2(5) 1_556 3_454 ?
O16 W3 O10 95.4(4) . 3_454 ?
O21 W3 O4 91.0(4) . 3_454 ?
O11 W3 O4 84.9(4) 1_556 3_454 ?
O16 W3 O4 165.9(4) . 3_454 ?
O10 W3 O4 72.7(4) 3_454 3_454 ?
O21 W3 W2 103.5(3) . 3_454 ?
O11 W3 W2 110.7(3) 1_556 3_454 ?
O16 W3 W2 130.9(3) . 3_454 ?
O10 W3 W2 35.6(3) 3_454 3_454 ?
O4 W3 W2 37.5(3) 3_454 3_454 ?
O21 W3 Cs2 46.5(3) . . ?
O11 W3 Cs2 119.0(3) 1_556 . ?
O16 W3 Cs2 55.0(3) . . ?
O10 W3 Cs2 112.1(3) 3_454 . ?
O4 W3 Cs2 136.1(3) 3_454 . ?
W2 W3 Cs2 129.11(2) 3_454 . ?
O21 W3 Cs2 132.8(3) . 1_455 ?
O11 W3 Cs2 46.5(3) 1_556 1_455 ?
O16 W3 Cs2 121.1(3) . 1_455 ?
O10 W3 Cs2 81.6(3) 3_454 1_455 ?
O4 W3 Cs2 50.9(2) 3_454 1_455 ?
W2 W3 Cs2 64.88(2) 3_454 1_455 ?
Cs2 W3 Cs2 165.48(3) . 1_455 ?
O21 W3 Cs2 39.5(3) . 3 ?
O11 W3 Cs2 75.0(3) 1_556 3 ?
O16 W3 Cs2 107.7(3) . 3 ?
O10 W3 Cs2 148.7(3) 3_454 3 ?
O4 W3 Cs2 86.2(3) 3_454 3 ?
W2 W3 Cs2 118.39(2) 3_454 3 ?
Cs2 W3 Cs2 67.88(2) . 3 ?
Cs2 W3 Cs2 103.15(2) 1_455 3 ?
W1 O1 U1 105.3(3) . . ?
W1 O1 U2 104.9(4) . . ?
U1 O1 U2 144.3(4) . . ?
W1 O1 Cs1 101.5(4) . . ?
U1 O1 Cs1 99.0(3) . . ?
U2 O1 Cs1 93.1(3) . . ?
W1 O2 U1 148.0(5) 4 . ?
W1 O2 U4 102.8(4) 4 . ?
U1 O2 U4 101.4(3) . . ?
W1 O2 Cs3 104.6(3) 4 4_455 ?
U1 O2 Cs3 92.1(3) . 4_455 ?
U4 O2 Cs3 98.4(3) . 4_455 ?
U2 O3 U4 108.5(3) . 1_556 ?
U2 O3 U3 138.7(4) . 1_556 ?
U4 O3 U3 104.1(3) 1_556 1_556 ?
U2 O3 Cs1 99.4(3) . 1_455 ?
U4 O3 Cs1 107.0(3) 1_556 1_455 ?
U3 O3 Cs1 94.6(3) 1_556 1_455 ?
W2 O4 W3 101.5(4) . 3_454 ?
W2 O4 U3 107.9(4) . . ?
W3 O4 U3 143.6(5) 3_454 . ?
W2 O4 Cs2 97.1(4) . 3_554 ?
W3 O4 Cs2 99.6(3) 3_454 3_554 ?
U3 O4 Cs2 97.6(3) . 3_554 ?
W2 O5 U2 152.4(6) . . ?
W2 O5 Cs2 109.3(4) . . ?
U2 O5 Cs2 96.4(3) . . ?
W2 O5 Cs1 103.1(4) . . ?
U2 O5 Cs1 91.2(3) . . ?
Cs2 O5 Cs1 79.1(2) . . ?
U1 O6 Cs1 113.6(4) . . ?
U1 O6 Cs3 122.0(4) . . ?
Cs1 O6 Cs3 86.1(2) . . ?
U1 O6 Cs4 121.4(4) . . ?
Cs1 O6 Cs4 97.0(2) . . ?
Cs3 O6 Cs4 108.2(3) . . ?
W1 O7 U1 106.3(3) . . ?
W1 O7 U4 106.9(4) . 4_556 ?
U1 O7 U4 141.9(4) . 4_556 ?
W1 O7 Cs3 98.7(4) . . ?
U1 O7 Cs3 95.2(3) . . ?
U4 O7 Cs3 97.7(3) 4_556 . ?
W1 O8 U4 139.6(5) . 1_556 ?
W1 O8 U2 107.3(4) . . ?
U4 O8 U2 102.9(3) 1_556 . ?
W1 O8 Cs3 95.2(3) . 1_455 ?
U4 O8 Cs3 94.2(3) 1_556 1_455 ?
U2 O8 Cs3 117.2(3) . 1_455 ?
U3 O9 Cs4 133.2(4) . . ?
U3 O9 Cs2 117.6(4) . 3_554 ?
Cs4 O9 Cs2 103.0(3) . 3_554 ?
W3 O10 W2 109.8(5) 3_454 . ?
W3 O11 U3 136.0(5) 1_554 . ?
W3 O11 Cs2 110.1(4) 1_554 1_454 ?
U3 O11 Cs2 113.6(3) . 1_454 ?
W3 O11 Cs1 109.7(4) 1_554 1_454 ?
U3 O11 Cs1 78.7(2) . 1_454 ?
Cs2 O11 Cs1 72.8(2) 1_454 1_454 ?
W1 O12 Cs3 129.1(5) . 4_556 ?
W1 O12 Cs1 102.7(4) . . ?
Cs3 O12 Cs1 116.6(3) 4_556 . ?
W1 O12 Cs3 106.6(4) . . ?
Cs3 O12 Cs3 110.3(3) 4_556 . ?
Cs1 O12 Cs3 80.9(2) . . ?
U1 O13 Cs3 123.6(4) . 4_455 ?
U1 O13 Cs4 129.7(4) . 1_455 ?
Cs3 O13 Cs4 102.1(3) 4_455 1_455 ?
U4 O14 U1 122.0(4) . . ?
U4 O14 U3 114.9(4) . . ?
U1 O14 U3 122.6(4) . . ?
U4 O15 Cs4 133.9(4) . . ?
U4 O15 Cs3 126.5(4) . 4 ?
Cs4 O15 Cs3 99.0(3) . 4 ?
W3 O16 U2 157.2(5) . . ?
W3 O16 Cs2 98.8(4) . . ?
U2 O16 Cs2 94.5(3) . . ?
U2 O17 Cs1 111.1(4) . . ?
U2 O17 Cs2 108.5(4) . . ?
Cs1 O17 Cs2 82.1(2) . . ?
U2 O17 Cs4 138.4(4) . 1_556 ?
Cs1 O17 Cs4 108.4(3) . 1_556 ?
Cs2 O17 Cs4 89.3(2) . 1_556 ?
U4 O18 Cs3 121.2(4) . 1_454 ?
U4 O18 Cs3 122.2(4) . 4_455 ?
Cs3 O18 Cs3 106.3(3) 1_454 4_455 ?
U4 O18 Cs1 111.8(4) . 1_454 ?
Cs3 O18 Cs1 81.3(2) 1_454 1_454 ?
Cs3 O18 Cs1 106.0(3) 4_455 1_454 ?
W2 O19 U1 149.1(6) . . ?
W2 O19 U3 105.7(4) . . ?
U1 O19 U3 104.1(4) . . ?
W2 O20 Cs2 106.5(5) . 3_554 ?
W2 O20 Cs1 92.4(4) . . ?
Cs2 O20 Cs1 156.7(4) 3_554 . ?
W3 O21 Cs2 109.7(4) . . ?
W3 O21 Cs2 119.9(4) . 3 ?
Cs2 O21 Cs2 96.1(3) . 3 ?
W3 O21 Cs4 125.8(5) . 3_554 ?
Cs2 O21 Cs4 97.7(3) . 3_554 ?
Cs2 O21 Cs4 101.6(3) 3 3_554 ?
U3 O22 Cs1 105.6(4) . 1_454 ?
U3 O22 Cs4 128.2(5) . 1_455 ?
Cs1 O22 Cs4 125.8(3) 1_454 1_455 ?
U3 O22 Cs2 109.8(4) . 1_454 ?
Cs1 O22 Cs2 74.3(2) 1_454 1_454 ?
Cs4 O22 Cs2 91.5(2) 1_455 1_454 ?
U2 O23 Cs1 109.2(4) . 1_455 ?
U2 O23 Cs4 141.4(5) . 1_455 ?
Cs1 O23 Cs4 108.1(3) 1_455 1_455 ?
O3 Cs1 O17 123.0(2) 1_655 . ?
O3 Cs1 O23 56.8(3) 1_655 1_655 ?
O17 Cs1 O23 167.7(2) . 1_655 ?
O3 Cs1 O22 59.1(2) 1_655 1_656 ?
O17 Cs1 O22 64.1(3) . 1_656 ?
O23 Cs1 O22 113.3(3) 1_655 1_656 ?
O3 Cs1 O1 158.7(2) 1_655 . ?
O17 Cs1 O1 58.0(2) . . ?
O23 Cs1 O1 127.5(3) 1_655 . ?
O22 Cs1 O1 118.7(2) 1_656 . ?
O3 Cs1 O6 121.1(2) 1_655 . ?
O17 Cs1 O6 113.0(3) . . ?
O23 Cs1 O6 72.5(3) 1_655 . ?
O22 Cs1 O6 166.1(2) 1_656 . ?
O1 Cs1 O6 55.3(2) . . ?
O3 Cs1 O12 106.4(2) 1_655 . ?
O17 Cs1 O12 71.2(2) . . ?
O23 Cs1 O12 121.1(2) 1_655 . ?
O22 Cs1 O12 92.2(2) 1_656 . ?
O1 Cs1 O12 52.5(2) . . ?
O6 Cs1 O12 74.3(2) . . ?
O3 Cs1 O5 148.2(2) 1_655 . ?
O17 Cs1 O5 49.7(2) . . ?
O23 Cs1 O5 122.8(3) 1_655 . ?
O22 Cs1 O5 102.5(3) 1_656 . ?
O1 Cs1 O5 51.3(2) . . ?
O6 Cs1 O5 83.3(2) . . ?
O12 Cs1 O5 99.5(2) . . ?
O3 Cs1 O18 53.4(2) 1_655 1_656 ?
O17 Cs1 O18 105.9(2) . 1_656 ?
O23 Cs1 O18 83.8(2) 1_655 1_656 ?
O22 Cs1 O18 72.4(2) 1_656 1_656 ?
O1 Cs1 O18 105.3(2) . 1_656 ?
O6 Cs1 O18 96.4(2) . 1_656 ?
O12 Cs1 O18 53.5(3) . 1_656 ?
O5 Cs1 O18 151.2(2) . 1_656 ?
O3 Cs1 O20 115.4(2) 1_655 . ?
O17 Cs1 O20 92.4(2) . . ?
O23 Cs1 O20 77.9(3) 1_655 . ?
O22 Cs1 O20 116.2(2) 1_656 . ?
O1 Cs1 O20 85.1(2) . . ?
O6 Cs1 O20 76.9(2) . . ?
O12 Cs1 O20 137.3(3) . . ?
O5 Cs1 O20 46.0(2) . . ?
O18 Cs1 O20 161.6(2) 1_656 . ?
O3 Cs1 O11 54.0(2) 1_655 1_656 ?
O17 Cs1 O11 89.9(2) . 1_656 ?
O23 Cs1 O11 80.7(2) 1_655 1_656 ?
O22 Cs1 O11 47.1(2) 1_656 1_656 ?
O1 Cs1 O11 142.7(2) . 1_656 ?
O6 Cs1 O11 145.9(2) . 1_656 ?
O12 Cs1 O11 139.1(2) . 1_656 ?
O5 Cs1 O11 94.3(2) . 1_656 ?
O18 Cs1 O11 101.3(2) 1_656 1_656 ?
O20 Cs1 O11 77.2(2) . 1_656 ?
O3 Cs1 W1 131.02(15) 1_655 . ?
O17 Cs1 W1 62.21(17) . . ?
O23 Cs1 W1 128.47(18) 1_655 . ?
O22 Cs1 W1 106.17(18) 1_656 . ?
O1 Cs1 W1 27.81(15) . . ?
O6 Cs1 W1 62.48(16) . . ?
O12 Cs1 W1 24.72(19) . . ?
O5 Cs1 W1 76.64(16) . . ?
O18 Cs1 W1 77.80(17) 1_656 . ?
O20 Cs1 W1 112.76(18) . . ?
O11 Cs1 W1 149.91(14) 1_656 . ?
O21 Cs2 O21 83.9(3) . 3 ?
O21 Cs2 O9 71.5(3) . 3_554 ?
O21 Cs2 O9 73.2(3) 3 3_554 ?
O21 Cs2 O20 95.1(3) . 3_554 ?
O21 Cs2 O20 135.3(3) 3 3_554 ?
O9 Cs2 O20 64.4(3) 3_554 3_554 ?
O21 Cs2 O5 95.8(3) . . ?
O21 Cs2 O5 139.5(2) 3 . ?
O9 Cs2 O5 144.9(3) 3_554 . ?
O20 Cs2 O5 85.2(3) 3_554 . ?
O21 Cs2 O11 156.7(3) . 1_656 ?
O21 Cs2 O11 76.5(3) 3 1_656 ?
O9 Cs2 O11 90.7(2) 3_554 1_656 ?
O20 Cs2 O11 90.2(3) 3_554 1_656 ?
O5 Cs2 O11 107.3(2) . 1_656 ?
O21 Cs2 O17 95.3(2) . . ?
O21 Cs2 O17 90.1(2) 3 . ?
O9 Cs2 O17 159.4(2) 3_554 . ?
O20 Cs2 O17 134.2(3) 3_554 . ?
O5 Cs2 O17 49.5(2) . . ?
O11 Cs2 O17 97.2(2) 1_656 . ?
O21 Cs2 O4 121.9(2) . 3_554 ?
O21 Cs2 O4 91.2(2) 3 3_554 ?
O9 Cs2 O4 52.0(2) 3_554 3_554 ?
O20 Cs2 O4 51.8(3) 3_554 3_554 ?
O5 Cs2 O4 121.6(2) . 3_554 ?
O11 Cs2 O4 47.3(2) 1_656 3_554 ?
O17 Cs2 O4 142.7(2) . 3_554 ?
O21 Cs2 O16 49.9(2) . . ?
O21 Cs2 O16 108.9(3) 3 . ?
O9 Cs2 O16 119.7(2) 3_554 . ?
O20 Cs2 O16 103.9(3) 3_554 . ?
O5 Cs2 O16 48.9(2) . . ?
O11 Cs2 O16 149.6(2) 1_656 . ?
O17 Cs2 O16 53.8(2) . . ?
O4 Cs2 O16 155.6(2) 3_554 . ?
O21 Cs2 O22 130.7(2) . 1_656 ?
O21 Cs2 O22 60.1(2) 3 1_656 ?
O9 Cs2 O22 121.0(2) 3_554 1_656 ?
O20 Cs2 O22 134.0(3) 3_554 1_656 ?
O5 Cs2 O22 92.4(2) . 1_656 ?
O11 Cs2 O22 46.9(2) 1_656 1_656 ?
O17 Cs2 O22 55.9(2) . 1_656 ?
O4 Cs2 O22 93.3(2) 3_554 1_656 ?
O16 Cs2 O22 108.6(2) . 1_656 ?
O21 Cs2 W3 23.81(19) . . ?
O21 Cs2 W3 97.6(2) 3 . ?
O9 Cs2 W3 94.10(19) 3_554 . ?
O20 Cs2 W3 98.8(2) 3_554 . ?
O5 Cs2 W3 72.75(17) . . ?
O11 Cs2 W3 171.02(16) 1_656 . ?
O17 Cs2 W3 75.89(17) . . ?
O4 Cs2 W3 140.62(15) 3_554 . ?
O16 Cs2 W3 26.16(15) . . ?
O22 Cs2 W3 124.28(15) 1_656 . ?
O21 Cs2 W2 112.24(18) . 3_554 ?
O21 Cs2 W2 118.16(19) 3 3_554 ?
O9 Cs2 W2 59.04(17) 3_554 3_554 ?
O20 Cs2 W2 23.8(2) 3_554 3_554 ?
O5 Cs2 W2 99.49(16) . 3_554 ?
O11 Cs2 W2 67.85(15) 1_656 3_554 ?
O17 Cs2 W2 141.47(16) . 3_554 ?
O4 Cs2 W2 28.63(16) 3_554 3_554 ?
O16 Cs2 W2 127.44(17) . 3_554 ?
O22 Cs2 W2 114.12(15) 1_656 3_554 ?
W3 Cs2 W2 121.12(3) . 3_554 ?
O12 Cs3 O13 112.0(3) 4 4_656 ?
O12 Cs3 O6 78.3(2) 4 . ?
O13 Cs3 O6 167.0(2) 4_656 . ?
O12 Cs3 O15 70.5(2) 4 4_556 ?
O13 Cs3 O15 78.6(3) 4_656 4_556 ?
O6 Cs3 O15 98.4(2) . 4_556 ?
O12 Cs3 O18 174.4(3) 4 1_656 ?
O13 Cs3 O18 73.4(2) 4_656 1_656 ?
O6 Cs3 O18 96.1(2) . 1_656 ?
O15 Cs3 O18 110.0(2) 4_556 1_656 ?
O12 Cs3 O18 55.4(3) 4 4_656 ?
O13 Cs3 O18 79.3(2) 4_656 4_656 ?
O6 Cs3 O18 113.6(2) . 4_656 ?
O15 Cs3 O18 106.0(2) 4_556 4_656 ?
O18 Cs3 O18 128.5(3) 1_656 4_656 ?
O12 Cs3 O12 124.6(4) 4 . ?
O13 Cs3 O12 96.3(2) 4_656 . ?
O6 Cs3 O12 70.9(2) . . ?
O15 Cs3 O12 69.9(2) 4_556 . ?
O18 Cs3 O12 52.0(3) 1_656 . ?
O18 Cs3 O12 174.6(2) 4_656 . ?
O12 Cs3 O2 107.2(2) 4 4_656 ?
O13 Cs3 O2 54.3(2) 4_656 4_656 ?
O6 Cs3 O2 131.8(2) . 4_656 ?
O15 Cs3 O2 129.0(2) 4_556 4_656 ?
O18 Cs3 O2 76.9(2) 1_656 4_656 ?
O18 Cs3 O2 51.8(2) 4_656 4_656 ?
O12 Cs3 O2 127.7(2) . 4_656 ?
O12 Cs3 O7 76.3(2) 4 . ?
O13 Cs3 O7 122.1(2) 4_656 . ?
O6 Cs3 O7 51.0(2) . . ?
O15 Cs3 O7 49.1(2) 4_556 . ?
O18 Cs3 O7 99.8(2) 1_656 . ?
O18 Cs3 O7 131.7(2) 4_656 . ?
O12 Cs3 O7 48.5(2) . . ?
O2 Cs3 O7 175.5(2) 4_656 . ?
O12 Cs3 O8 131.9(2) 4 1_655 ?
O13 Cs3 O8 81.6(2) 4_656 1_655 ?
O6 Cs3 O8 97.5(2) . 1_655 ?
O15 Cs3 O8 155.0(2) 4_556 1_655 ?
O18 Cs3 O8 48.9(2) 1_656 1_655 ?
O18 Cs3 O8 84.9(2) 4_656 1_655 ?
O12 Cs3 O8 97.6(2) . 1_655 ?
O2 Cs3 O8 42.63(19) 4_656 1_655 ?
O7 Cs3 O8 136.71(19) . 1_655 ?
O12 Cs3 W1 102.2(2) 4 . ?
O13 Cs3 W1 110.12(18) 4_656 . ?
O6 Cs3 W1 58.61(16) . . ?
O15 Cs3 W1 58.09(16) 4_556 . ?
O18 Cs3 W1 74.10(18) 1_656 . ?
O18 Cs3 W1 157.33(19) 4_656 . ?
O12 Cs3 W1 22.55(18) . . ?
O2 Cs3 W1 150.26(15) 4_656 . ?
O7 Cs3 W1 25.92(14) . . ?
O8 Cs3 W1 116.38(13) 1_655 . ?
O12 Cs3 U1 114.12(19) 4 4_656 ?
O13 Cs3 U1 20.28(19) 4_656 4_656 ?
O6 Cs3 U1 161.99(18) . 4_656 ?
O15 Cs3 U1 98.08(17) 4_556 4_656 ?
O18 Cs3 U1 71.39(17) 1_656 4_656 ?
O18 Cs3 U1 68.19(18) 4_656 4_656 ?
O12 Cs3 U1 108.44(18) . 4_656 ?
O2 Cs3 U1 34.14(14) 4_656 4_656 ?
O7 Cs3 U1 142.10(14) . 4_656 ?
O8 Cs3 U1 64.57(14) 1_655 4_656 ?
W1 Cs3 U1 126.50(3) . 4_656 ?
O9 Cs4 O15 79.0(3) . . ?
O9 Cs4 O13 158.2(3) . 1_655 ?
O15 Cs4 O13 79.7(3) . 1_655 ?
O9 Cs4 O22 108.4(3) . 1_655 ?
O15 Cs4 O22 91.2(2) . 1_655 ?
O13 Cs4 O22 67.4(3) 1_655 1_655 ?
O9 Cs4 O23 121.5(3) . 1_655 ?
O15 Cs4 O23 122.4(2) . 1_655 ?
O13 Cs4 O23 74.5(3) 1_655 1_655 ?
O22 Cs4 O23 122.8(3) 1_655 1_655 ?
O9 Cs4 O21 71.3(3) . 3_554 ?
O15 Cs4 O21 132.2(3) . 3_554 ?
O13 Cs4 O21 121.5(3) 1_655 3_554 ?
O22 Cs4 O21 65.1(2) 1_655 3_554 ?
O23 Cs4 O21 105.0(3) 1_655 3_554 ?
O9 Cs4 O6 81.9(2) . . ?
O15 Cs4 O6 66.3(2) . . ?
O13 Cs4 O6 93.7(2) 1_655 . ?
O22 Cs4 O6 153.5(2) 1_655 . ?
O23 Cs4 O6 65.1(2) 1_655 . ?
O21 Cs4 O6 140.6(2) 3_554 . ?
O9 Cs4 O17 61.7(2) . 1_554 ?
O15 Cs4 O17 54.1(2) . 1_554 ?
O13 Cs4 O17 101.5(2) 1_655 1_554 ?
O22 Cs4 O17 56.3(3) 1_655 1_554 ?
O23 Cs4 O17 175.5(2) 1_655 1_554 ?
O21 Cs4 O17 78.8(2) 3_554 1_554 ?
O6 Cs4 O17 113.6(2) . 1_554 ?
O9 Cs4 U3 17.37(18) . . ?
O15 Cs4 U3 65.48(18) . . ?
O13 Cs4 U3 144.54(19) 1_655 . ?
O22 Cs4 U3 117.7(2) 1_655 . ?
O23 Cs4 U3 118.20(19) 1_655 . ?
O21 Cs4 U3 88.71(19) 3_554 . ?
O6 Cs4 U3 67.00(16) . . ?
O17 Cs4 U3 63.86(15) 1_554 . ?
O9 Cs4 W2 127.51(18) . 1_655 ?
O15 Cs4 W2 147.18(18) . 1_655 ?
O13 Cs4 W2 71.29(18) 1_655 1_655 ?
O22 Cs4 W2 64.0(2) 1_655 1_655 ?
O23 Cs4 W2 64.27(19) 1_655 1_655 ?
O21 Cs4 W2 58.3(2) 3_554 1_655 ?
O6 Cs4 W2 129.34(16) . 1_655 ?
O17 Cs4 W2 116.75(15) 1_554 1_655 ?
U3 Cs4 W2 143.99(3) . 1_655 ?
O9 Cs4 U1 169.14(19) . 1_655 ?
O15 Cs4 U1 96.75(18) . 1_655 ?
O13 Cs4 U1 17.91(18) 1_655 1_655 ?
O22 Cs4 U1 61.38(19) 1_655 1_655 ?
O23 Cs4 U1 69.21(18) 1_655 1_655 ?
O21 Cs4 U1 105.42(19) 3_554 1_655 ?
O6 Cs4 U1 105.70(15) . 1_655 ?
O17 Cs4 U1 107.63(15) 1_554 1_655 ?
U3 Cs4 U1 162.18(3) . 1_655 ?
W2 Cs4 U1 53.397(16) 1_655 1_655 ?
O9 Cs4 U3 120.49(18) . 1_655 ?
O15 Cs4 U3 106.55(17) . 1_655 ?
O13 Cs4 U3 62.09(17) 1_655 1_655 ?
O22 Cs4 U3 18.4(2) 1_655 1_655 ?
O23 Cs4 U3 105.11(19) 1_655 1_655 ?
O21 Cs4 U3 61.94(18) 3_554 1_655 ?
O6 Cs4 U3 155.80(15) . 1_655 ?
O17 Cs4 U3 74.36(15) 1_554 1_655 ?
U3 Cs4 U3 133.01(3) . 1_655 ?
W2 Cs4 U3 45.949(15) 1_655 1_655 ?
U1 Cs4 U3 50.860(15) 1_655 1_655 ?
 
loop_
 _geom_torsion_atom_site_label_1
 _geom_torsion_atom_site_label_2
 _geom_torsion_atom_site_label_3
 _geom_torsion_atom_site_label_4
 _geom_torsion
 _geom_torsion_site_symmetry_1
 _geom_torsion_site_symmetry_2
 _geom_torsion_site_symmetry_3
 _geom_torsion_site_symmetry_4
 _geom_torsion_publ_flag
O13 U1 U3 O9 176.0(4) . . . . ?
O6 U1 U3 O9 -2.6(4) . . . . ?
O14 U1 U3 O9 -81.8(6) . . . . ?
O19 U1 U3 O9 79.4(5) . . . . ?
O7 U1 U3 O9 -152.3(16) . . . . ?
O1 U1 U3 O9 89.6(4) . . . . ?
O2 U1 U3 O9 -95.0(4) . . . . ?
W1 U1 U3 O9 96.2(3) . . . . ?
U4 U1 U3 O9 -86.8(3) . . . . ?
Cs1 U1 U3 O9 41.2(3) . . . . ?
Cs3 U1 U3 O9 -148.8(3) 4_455 . . . ?
O13 U1 U3 O22 -2.3(4) . . . . ?
O6 U1 U3 O22 179.1(4) . . . . ?
O14 U1 U3 O22 99.9(6) . . . . ?
O19 U1 U3 O22 -98.9(5) . . . . ?
O7 U1 U3 O22 29.4(15) . . . . ?
O1 U1 U3 O22 -88.7(4) . . . . ?
O2 U1 U3 O22 86.8(4) . . . . ?
W1 U1 U3 O22 -82.0(3) . . . . ?
U4 U1 U3 O22 94.9(3) . . . . ?
Cs1 U1 U3 O22 -137.1(3) . . . . ?
Cs3 U1 U3 O22 33.0(3) 4_455 . . . ?
O13 U1 U3 O14 -102.2(6) . . . . ?
O6 U1 U3 O14 79.2(6) . . . . ?
O19 U1 U3 O14 161.2(7) . . . . ?
O7 U1 U3 O14 -70.5(16) . . . . ?
O1 U1 U3 O14 171.4(6) . . . . ?
O2 U1 U3 O14 -13.1(6) . . . . ?
W1 U1 U3 O14 178.1(6) . . . . ?
U4 U1 U3 O14 -5.0(6) . . . . ?
Cs1 U1 U3 O14 123.0(6) . . . . ?
Cs3 U1 U3 O14 -66.9(6) 4_455 . . . ?
O13 U1 U3 O11 15.2(12) . . . . ?
O6 U1 U3 O11 -163.4(12) . . . . ?
O14 U1 U3 O11 117.4(13) . . . . ?
O19 U1 U3 O11 -81.4(12) . . . . ?
O7 U1 U3 O11 46.9(19) . . . . ?
O1 U1 U3 O11 -71.1(12) . . . . ?
O2 U1 U3 O11 104.3(12) . . . . ?
W1 U1 U3 O11 -64.5(12) . . . . ?
U4 U1 U3 O11 112.4(12) . . . . ?
Cs1 U1 U3 O11 -119.6(12) . . . . ?
Cs3 U1 U3 O11 50.5(12) 4_455 . . . ?
O13 U1 U3 O3 -95.4(4) . . . 1_554 ?
O6 U1 U3 O3 86.0(4) . . . 1_554 ?
O14 U1 U3 O3 6.8(6) . . . 1_554 ?
O19 U1 U3 O3 168.0(5) . . . 1_554 ?
O7 U1 U3 O3 -63.6(15) . . . 1_554 ?
O1 U1 U3 O3 178.3(3) . . . 1_554 ?
O2 U1 U3 O3 -6.3(3) . . . 1_554 ?
W1 U1 U3 O3 -175.1(2) . . . 1_554 ?
U4 U1 U3 O3 1.8(2) . . . 1_554 ?
Cs1 U1 U3 O3 129.9(2) . . . 1_554 ?
Cs3 U1 U3 O3 -60.1(2) 4_455 . . 1_554 ?
O13 U1 U3 O4 89.8(4) . . . . ?
O6 U1 U3 O4 -88.8(4) . . . . ?
O14 U1 U3 O4 -168.0(6) . . . . ?
O19 U1 U3 O4 -6.8(5) . . . . ?
O7 U1 U3 O4 121.5(15) . . . . ?
O1 U1 U3 O4 3.4(3) . . . . ?
O2 U1 U3 O4 178.9(3) . . . . ?
W1 U1 U3 O4 10.1(2) . . . . ?
U4 U1 U3 O4 -173.0(2) . . . . ?
Cs1 U1 U3 O4 -45.0(2) . . . . ?
Cs3 U1 U3 O4 125.1(2) 4_455 . . . ?
O13 U1 U3 O19 96.6(5) . . . . ?
O6 U1 U3 O19 -82.0(5) . . . . ?
O14 U1 U3 O19 -161.2(7) . . . . ?
O7 U1 U3 O19 128.3(16) . . . . ?
O1 U1 U3 O19 10.2(5) . . . . ?
O2 U1 U3 O19 -174.3(5) . . . . ?
W1 U1 U3 O19 16.9(4) . . . . ?
U4 U1 U3 O19 -166.2(4) . . . . ?
Cs1 U1 U3 O19 -38.2(4) . . . . ?
Cs3 U1 U3 O19 131.9(4) 4_455 . . . ?
O13 U1 U3 W2 101.0(3) . . . . ?
O6 U1 U3 W2 -77.6(3) . . . . ?
O14 U1 U3 W2 -156.8(6) . . . . ?
O19 U1 U3 W2 4.4(4) . . . . ?
O7 U1 U3 W2 132.7(15) . . . . ?
O1 U1 U3 W2 14.6(3) . . . . ?
O2 U1 U3 W2 -169.9(2) . . . . ?
W1 U1 U3 W2 21.30(4) . . . . ?
U4 U1 U3 W2 -161.78(2) . . . . ?
Cs1 U1 U3 W2 -33.77(2) . . . . ?
Cs3 U1 U3 W2 136.30(2) 4_455 . . . ?
O13 U1 U3 U4 -97.2(3) . . . . ?
O6 U1 U3 U4 84.2(3) . . . . ?
O14 U1 U3 U4 5.0(6) . . . . ?
O19 U1 U3 U4 166.2(4) . . . . ?
O7 U1 U3 U4 -65.5(15) . . . . ?
O1 U1 U3 U4 176.4(3) . . . . ?
O2 U1 U3 U4 -8.1(2) . . . . ?
W1 U1 U3 U4 -176.93(4) . . . . ?
Cs1 U1 U3 U4 128.01(2) . . . . ?
Cs3 U1 U3 U4 -61.921(19) 4_455 . . . ?
O13 U1 U3 Cs1 -45.2(3) . . . 1_454 ?
O6 U1 U3 Cs1 136.2(3) . . . 1_454 ?
O14 U1 U3 Cs1 57.0(6) . . . 1_454 ?
O19 U1 U3 Cs1 -141.8(4) . . . 1_454 ?
O7 U1 U3 Cs1 -13.5(15) . . . 1_454 ?
O1 U1 U3 Cs1 -131.6(3) . . . 1_454 ?
O2 U1 U3 Cs1 43.9(2) . . . 1_454 ?
W1 U1 U3 Cs1 -124.90(4) . . . 1_454 ?
U4 U1 U3 Cs1 52.03(2) . . . 1_454 ?
Cs1 U1 U3 Cs1 -179.96(3) . . . 1_454 ?
Cs3 U1 U3 Cs1 -9.90(2) 4_455 . . 1_454 ?
O13 U1 U3 Cs2 137.4(3) . . . 3_554 ?
O6 U1 U3 Cs2 -41.2(3) . . . 3_554 ?
O14 U1 U3 Cs2 -120.4(6) . . . 3_554 ?
O19 U1 U3 Cs2 40.8(4) . . . 3_554 ?
O7 U1 U3 Cs2 169.1(15) . . . 3_554 ?
O1 U1 U3 Cs2 51.0(3) . . . 3_554 ?
O2 U1 U3 Cs2 -133.5(2) . . . 3_554 ?
W1 U1 U3 Cs2 57.69(5) . . . 3_554 ?
U4 U1 U3 Cs2 -125.38(2) . . . 3_554 ?
Cs1 U1 U3 Cs2 2.63(3) . . . 3_554 ?
Cs3 U1 U3 Cs2 172.70(2) 4_455 . . 3_554 ?
O9 U3 U4 O15 13.0(4) . . . . ?
O22 U3 U4 O15 -167.6(4) . . . . ?
O14 U3 U4 O15 -81.3(6) . . . . ?
O11 U3 U4 O15 106.6(4) . . . . ?
O3 U3 U4 O15 97.2(5) 1_554 . . . ?
O4 U3 U4 O15 -68.5(6) . . . . ?
O19 U3 U4 O15 -77.6(4) . . . . ?
W2 U3 U4 O15 -65.6(3) . . . . ?
U1 U3 U4 O15 -85.8(3) . . . . ?
Cs1 U3 U4 O15 147.8(3) 1_454 . . . ?
Cs2 U3 U4 O15 14.4(3) 3_554 . . . ?
O9 U3 U4 O18 -166.8(4) . . . . ?
O22 U3 U4 O18 12.6(4) . . . . ?
O14 U3 U4 O18 98.9(6) . . . . ?
O11 U3 U4 O18 -73.2(4) . . . . ?
O3 U3 U4 O18 -82.6(5) 1_554 . . . ?
O4 U3 U4 O18 111.7(6) . . . . ?
O19 U3 U4 O18 102.6(4) . . . . ?
W2 U3 U4 O18 114.6(3) . . . . ?
U1 U3 U4 O18 94.4(3) . . . . ?
Cs1 U3 U4 O18 -32.0(3) 1_454 . . . ?
Cs2 U3 U4 O18 -165.4(3) 3_554 . . . ?
O9 U3 U4 O14 94.3(6) . . . . ?
O22 U3 U4 O14 -86.3(6) . . . . ?
O11 U3 U4 O14 -172.1(6) . . . . ?
O3 U3 U4 O14 178.5(6) 1_554 . . . ?
O4 U3 U4 O14 12.9(8) . . . . ?
O19 U3 U4 O14 3.7(6) . . . . ?
W2 U3 U4 O14 15.7(5) . . . . ?
U1 U3 U4 O14 -4.4(5) . . . . ?
Cs1 U3 U4 O14 -130.8(5) 1_454 . . . ?
Cs2 U3 U4 O14 95.7(5) 3_554 . . . ?
O9 U3 U4 O8 -74.9(4) . . . 1_554 ?
O22 U3 U4 O8 104.5(4) . . . 1_554 ?
O14 U3 U4 O8 -169.2(6) . . . 1_554 ?
O11 U3 U4 O8 18.8(4) . . . 1_554 ?
O3 U3 U4 O8 9.3(4) 1_554 . . 1_554 ?
O4 U3 U4 O8 -156.3(6) . . . 1_554 ?
O19 U3 U4 O8 -165.5(4) . . . 1_554 ?
W2 U3 U4 O8 -153.5(3) . . . 1_554 ?
U1 U3 U4 O8 -173.6(3) . . . 1_554 ?
Cs1 U3 U4 O8 60.0(3) 1_454 . . 1_554 ?
Cs2 U3 U4 O8 -73.5(3) 3_554 . . 1_554 ?
O9 U3 U4 O3 -84.2(5) . . . 1_554 ?
O22 U3 U4 O3 95.2(5) . . . 1_554 ?
O14 U3 U4 O3 -178.5(6) . . . 1_554 ?
O11 U3 U4 O3 9.4(5) . . . 1_554 ?
O4 U3 U4 O3 -165.6(7) . . . 1_554 ?
O19 U3 U4 O3 -174.8(4) . . . 1_554 ?
W2 U3 U4 O3 -162.8(4) . . . 1_554 ?
U1 U3 U4 O3 177.0(4) . . . 1_554 ?
Cs1 U3 U4 O3 50.7(4) 1_454 . . 1_554 ?
Cs2 U3 U4 O3 -82.8(4) 3_554 . . 1_554 ?
O9 U3 U4 O7 93.6(8) . . . 4 ?
O22 U3 U4 O7 -87.0(8) . . . 4 ?
O14 U3 U4 O7 -0.7(9) . . . 4 ?
O11 U3 U4 O7 -172.8(8) . . . 4 ?
O3 U3 U4 O7 177.8(9) 1_554 . . 4 ?
O4 U3 U4 O7 12.2(10) . . . 4 ?
O19 U3 U4 O7 3.0(8) . . . 4 ?
W2 U3 U4 O7 15.0(8) . . . 4 ?
U1 U3 U4 O7 -5.2(8) . . . 4 ?
Cs1 U3 U4 O7 -131.5(8) 1_454 . . 4 ?
Cs2 U3 U4 O7 95.0(8) 3_554 . . 4 ?
O9 U3 U4 O2 106.7(4) . . . . ?
O22 U3 U4 O2 -73.9(4) . . . . ?
O14 U3 U4 O2 12.4(6) . . . . ?
O11 U3 U4 O2 -159.7(4) . . . . ?
O3 U3 U4 O2 -169.1(4) 1_554 . . . ?
O4 U3 U4 O2 25.2(6) . . . . ?
O19 U3 U4 O2 16.1(3) . . . . ?
W2 U3 U4 O2 28.1(2) . . . . ?
U1 U3 U4 O2 7.9(2) . . . . ?
Cs1 U3 U4 O2 -118.5(2) 1_454 . . . ?
Cs2 U3 U4 O2 108.1(2) 3_554 . . . ?
O9 U3 U4 W1 99.8(3) . . . 4 ?
O22 U3 U4 W1 -80.8(3) . . . 4 ?
O14 U3 U4 W1 5.5(5) . . . 4 ?
O11 U3 U4 W1 -166.6(3) . . . 4 ?
O3 U3 U4 W1 -176.0(4) 1_554 . . 4 ?
O4 U3 U4 W1 18.4(6) . . . 4 ?
O19 U3 U4 W1 9.2(2) . . . 4 ?
W2 U3 U4 W1 21.17(4) . . . 4 ?
U1 U3 U4 W1 1.02(2) . . . 4 ?
Cs1 U3 U4 W1 -125.35(3) 1_454 . . 4 ?
Cs2 U3 U4 W1 101.20(3) 3_554 . . 4 ?
O9 U3 U4 U2 -69.0(3) . . . 1_554 ?
O22 U3 U4 U2 110.4(3) . . . 1_554 ?
O14 U3 U4 U2 -163.3(5) . . . 1_554 ?
O11 U3 U4 U2 24.6(3) . . . 1_554 ?
O3 U3 U4 U2 15.2(4) 1_554 . . 1_554 ?
O4 U3 U4 U2 -150.4(6) . . . 1_554 ?
O19 U3 U4 U2 -159.6(2) . . . 1_554 ?
W2 U3 U4 U2 -147.62(2) . . . 1_554 ?
U1 U3 U4 U2 -167.765(18) . . . 1_554 ?
Cs1 U3 U4 U2 65.865(19) 1_454 . . 1_554 ?
Cs2 U3 U4 U2 -67.58(3) 3_554 . . 1_554 ?
O9 U3 U4 U1 98.8(3) . . . . ?
O22 U3 U4 U1 -81.8(3) . . . . ?
O14 U3 U4 U1 4.4(5) . . . . ?
O11 U3 U4 U1 -167.6(3) . . . . ?
O3 U3 U4 U1 -177.0(4) 1_554 . . . ?
O4 U3 U4 U1 17.3(6) . . . . ?
O19 U3 U4 U1 8.2(2) . . . . ?
W2 U3 U4 U1 20.15(2) . . . . ?
Cs1 U3 U4 U1 -126.37(2) 1_454 . . . ?
Cs2 U3 U4 U1 100.18(3) 3_554 . . . ?
O9 U3 U4 Cs1 -134.9(3) . . . 1_454 ?
O22 U3 U4 Cs1 44.5(3) . . . 1_454 ?
O14 U3 U4 Cs1 130.8(5) . . . 1_454 ?
O11 U3 U4 Cs1 -41.2(3) . . . 1_454 ?
O3 U3 U4 Cs1 -50.7(4) 1_554 . . 1_454 ?
O4 U3 U4 Cs1 143.7(6) . . . 1_454 ?
O19 U3 U4 Cs1 134.5(2) . . . 1_454 ?
W2 U3 U4 Cs1 146.52(3) . . . 1_454 ?
U1 U3 U4 Cs1 126.37(2) . . . 1_454 ?
Cs2 U3 U4 Cs1 -133.45(3) 3_554 . . 1_454 ?
O13 U1 U4 O15 176.1(4) . . . . ?
O6 U1 U4 O15 -5.5(4) . . . . ?
O14 U1 U4 O15 89.4(6) . . . . ?
O19 U1 U4 O15 85.6(4) . . . . ?
O7 U1 U4 O15 -93.5(4) . . . . ?
O1 U1 U4 O15 49(3) . . . . ?
O2 U1 U4 O15 -98.2(5) . . . . ?
W1 U1 U4 O15 -88.6(3) . . . . ?
U3 U1 U4 O15 94.4(3) . . . . ?
Cs1 U1 U4 O15 13.6(3) . . . . ?
Cs3 U1 U4 O15 -157.2(3) 4_455 . . . ?
O13 U1 U4 O18 -8.9(4) . . . . ?
O6 U1 U4 O18 169.5(4) . . . . ?
O14 U1 U4 O18 -95.5(6) . . . . ?
O19 U1 U4 O18 -99.4(4) . . . . ?
O7 U1 U4 O18 81.5(4) . . . . ?
O1 U1 U4 O18 -136(3) . . . . ?
O2 U1 U4 O18 76.9(5) . . . . ?
W1 U1 U4 O18 86.4(3) . . . . ?
U3 U1 U4 O18 -90.6(3) . . . . ?
Cs1 U1 U4 O18 -171.4(3) . . . . ?
Cs3 U1 U4 O18 17.8(3) 4_455 . . . ?
O13 U1 U4 O14 86.6(6) . . . . ?
O6 U1 U4 O14 -94.9(6) . . . . ?
O19 U1 U4 O14 -3.8(6) . . . . ?
O7 U1 U4 O14 177.1(6) . . . . ?
O1 U1 U4 O14 -40(3) . . . . ?
O2 U1 U4 O14 172.4(7) . . . . ?
W1 U1 U4 O14 -178.1(6) . . . . ?
U3 U1 U4 O14 5.0(6) . . . . ?
Cs1 U1 U4 O14 -75.8(6) . . . . ?
Cs3 U1 U4 O14 113.4(6) 4_455 . . . ?
O13 U1 U4 O8 117.8(14) . . . 1_554 ?
O6 U1 U4 O8 -63.7(14) . . . 1_554 ?
O14 U1 U4 O8 31.2(15) . . . 1_554 ?
O19 U1 U4 O8 27.4(14) . . . 1_554 ?
O7 U1 U4 O8 -151.7(14) . . . 1_554 ?
O1 U1 U4 O8 -9(3) . . . 1_554 ?
O2 U1 U4 O8 -156.4(14) . . . 1_554 ?
W1 U1 U4 O8 -146.9(14) . . . 1_554 ?
U3 U1 U4 O8 36.2(14) . . . 1_554 ?
Cs1 U1 U4 O8 -44.7(14) . . . 1_554 ?
Cs3 U1 U4 O8 144.5(14) 4_455 . . 1_554 ?
O13 U1 U4 O3 79.8(4) . . . 1_554 ?
O6 U1 U4 O3 -101.8(4) . . . 1_554 ?
O14 U1 U4 O3 -6.8(6) . . . 1_554 ?
O19 U1 U4 O3 -10.7(4) . . . 1_554 ?
O7 U1 U4 O3 170.2(4) . . . 1_554 ?
O1 U1 U4 O3 -47(3) . . . 1_554 ?
O2 U1 U4 O3 165.6(4) . . . 1_554 ?
W1 U1 U4 O3 175.1(2) . . . 1_554 ?
U3 U1 U4 O3 -1.9(2) . . . 1_554 ?
Cs1 U1 U4 O3 -82.7(2) . . . 1_554 ?
Cs3 U1 U4 O3 106.5(2) 4_455 . . 1_554 ?
O13 U1 U4 O7 -99.9(4) . . . 4 ?
O6 U1 U4 O7 78.5(4) . . . 4 ?
O14 U1 U4 O7 173.5(6) . . . 4 ?
O19 U1 U4 O7 169.6(4) . . . 4 ?
O7 U1 U4 O7 -9.49(9) . . . 4 ?
O1 U1 U4 O7 133(3) . . . 4 ?
O2 U1 U4 O7 -14.2(4) . . . 4 ?
W1 U1 U4 O7 -4.6(2) . . . 4 ?
U3 U1 U4 O7 178.4(2) . . . 4 ?
Cs1 U1 U4 O7 97.6(2) . . . 4 ?
Cs3 U1 U4 O7 -73.2(2) 4_455 . . 4 ?
O13 U1 U4 O2 -85.8(5) . . . . ?
O6 U1 U4 O2 92.7(4) . . . . ?
O14 U1 U4 O2 -172.4(7) . . . . ?
O19 U1 U4 O2 -176.2(5) . . . . ?
O7 U1 U4 O2 4.7(4) . . . . ?
O1 U1 U4 O2 147(3) . . . . ?
W1 U1 U4 O2 9.6(4) . . . . ?
U3 U1 U4 O2 -167.4(4) . . . . ?
Cs1 U1 U4 O2 111.8(4) . . . . ?
Cs3 U1 U4 O2 -59.0(4) 4_455 . . . ?
O13 U1 U4 W1 -97.5(3) . . . 4 ?
O6 U1 U4 W1 80.9(3) . . . 4 ?
O14 U1 U4 W1 175.9(6) . . . 4 ?
O19 U1 U4 W1 172.0(3) . . . 4 ?
O7 U1 U4 W1 -7.1(3) . . . 4 ?
O1 U1 U4 W1 136(3) . . . 4 ?
O2 U1 U4 W1 -11.8(4) . . . 4 ?
W1 U1 U4 W1 -2.20(4) . . . 4 ?
U3 U1 U4 W1 -179.17(2) . . . 4 ?
Cs1 U1 U4 W1 100.00(3) . . . 4 ?
Cs3 U1 U4 W1 -70.80(2) 4_455 . . 4 ?
O13 U1 U4 U2 97.0(3) . . . 1_554 ?
O6 U1 U4 U2 -84.5(3) . . . 1_554 ?
O14 U1 U4 U2 10.4(6) . . . 1_554 ?
O19 U1 U4 U2 6.6(3) . . . 1_554 ?
O7 U1 U4 U2 -172.5(3) . . . 1_554 ?
O1 U1 U4 U2 -30(3) . . . 1_554 ?
O2 U1 U4 U2 -177.2(4) . . . 1_554 ?
W1 U1 U4 U2 -167.66(4) . . . 1_554 ?
U3 U1 U4 U2 15.36(2) . . . 1_554 ?
Cs1 U1 U4 U2 -65.46(3) . . . 1_554 ?
Cs3 U1 U4 U2 123.74(3) 4_455 . . 1_554 ?
O13 U1 U4 U3 81.7(3) . . . . ?
O6 U1 U4 U3 -99.9(3) . . . . ?
O14 U1 U4 U3 -5.0(6) . . . . ?
O19 U1 U4 U3 -8.8(3) . . . . ?
O7 U1 U4 U3 172.1(3) . . . . ?
O1 U1 U4 U3 -45(3) . . . . ?
O2 U1 U4 U3 167.4(4) . . . . ?
W1 U1 U4 U3 176.97(4) . . . . ?
Cs1 U1 U4 U3 -80.82(3) . . . . ?
Cs3 U1 U4 U3 108.38(2) 4_455 . . . ?
O13 U1 U4 Cs1 36.8(3) . . . 1_454 ?
O6 U1 U4 Cs1 -144.8(3) . . . 1_454 ?
O14 U1 U4 Cs1 -49.8(6) . . . 1_454 ?
O19 U1 U4 Cs1 -53.7(3) . . . 1_454 ?
O7 U1 U4 Cs1 127.2(3) . . . 1_454 ?
O1 U1 U4 Cs1 -90(3) . . . 1_454 ?
O2 U1 U4 Cs1 122.6(4) . . . 1_454 ?
W1 U1 U4 Cs1 132.12(4) . . . 1_454 ?
U3 U1 U4 Cs1 -44.852(18) . . . 1_454 ?
Cs1 U1 U4 Cs1 -125.67(3) . . . 1_454 ?
Cs3 U1 U4 Cs1 63.52(2) 4_455 . . 1_454 ?
O13 U1 W1 O12 -178.5(4) . . . . ?
O6 U1 W1 O12 1.6(4) . . . . ?
O14 U1 W1 O12 6(13) . . . . ?
O19 U1 W1 O12 -88.5(4) . . . . ?
O7 U1 W1 O12 93.4(6) . . . . ?
O1 U1 W1 O12 -89.2(5) . . . . ?
O2 U1 W1 O12 91.9(4) . . . . ?
U4 U1 W1 O12 85.3(3) . . . . ?
U3 U1 W1 O12 -100.0(3) . . . . ?
Cs1 U1 W1 O12 -35.4(3) . . . . ?
Cs3 U1 W1 O12 146.5(3) 4_455 . . . ?
O13 U1 W1 O2 57.1(4) . . . 4_556 ?
O6 U1 W1 O2 -122.8(4) . . . 4_556 ?
O14 U1 W1 O2 -119(13) . . . 4_556 ?
O19 U1 W1 O2 147.1(5) . . . 4_556 ?
O7 U1 W1 O2 -31.1(5) . . . 4_556 ?
O1 U1 W1 O2 146.4(5) . . . 4_556 ?
O2 U1 W1 O2 -32.55(15) . . . 4_556 ?
U4 U1 W1 O2 -39.1(3) . . . 4_556 ?
U3 U1 W1 O2 135.5(3) . . . 4_556 ?
Cs1 U1 W1 O2 -159.8(3) . . . 4_556 ?
Cs3 U1 W1 O2 22.0(3) 4_455 . . 4_556 ?
O13 U1 W1 O8 -53.6(4) . . . . ?
O6 U1 W1 O8 126.5(4) . . . . ?
O14 U1 W1 O8 131(13) . . . . ?
O19 U1 W1 O8 36.4(4) . . . . ?
O7 U1 W1 O8 -141.8(5) . . . . ?
O1 U1 W1 O8 35.7(5) . . . . ?
O2 U1 W1 O8 -143.3(4) . . . . ?
U4 U1 W1 O8 -149.8(3) . . . . ?
U3 U1 W1 O8 24.8(3) . . . . ?
Cs1 U1 W1 O8 89.5(3) . . . . ?
Cs3 U1 W1 O8 -88.7(3) 4_455 . . . ?
O13 U1 W1 O7 88.1(5) . . . . ?
O6 U1 W1 O7 -91.8(5) . . . . ?
O14 U1 W1 O7 -88(13) . . . . ?
O19 U1 W1 O7 178.2(5) . . . . ?
O1 U1 W1 O7 177.5(6) . . . . ?
O2 U1 W1 O7 -1.5(5) . . . . ?
U4 U1 W1 O7 -8.1(4) . . . . ?
U3 U1 W1 O7 166.6(4) . . . . ?
Cs1 U1 W1 O7 -128.7(4) . . . . ?
Cs3 U1 W1 O7 53.1(4) 4_455 . . . ?
O13 U1 W1 O1 -89.3(5) . . . . ?
O6 U1 W1 O1 90.8(5) . . . . ?
O14 U1 W1 O1 95(13) . . . . ?
O19 U1 W1 O1 0.7(5) . . . . ?
O7 U1 W1 O1 -177.5(6) . . . . ?
O2 U1 W1 O1 -178.9(5) . . . . ?
U4 U1 W1 O1 174.5(4) . . . . ?
U3 U1 W1 O1 -10.9(4) . . . . ?
Cs1 U1 W1 O1 53.8(4) . . . . ?
Cs3 U1 W1 O1 -124.4(4) 4_455 . . . ?
O13 U1 W1 U4 75.6(3) . . . 4_556 ?
O6 U1 W1 U4 -104.3(3) . . . 4_556 ?
O14 U1 W1 U4 -100(13) . . . 4_556 ?
O19 U1 W1 U4 165.6(3) . . . 4_556 ?
O7 U1 W1 U4 -12.5(4) . . . 4_556 ?
O1 U1 W1 U4 164.9(4) . . . 4_556 ?
O2 U1 W1 U4 -14.0(2) . . . 4_556 ?
U4 U1 W1 U4 -20.58(4) . . . 4_556 ?
U3 U1 W1 U4 154.08(4) . . . 4_556 ?
Cs1 U1 W1 U4 -141.26(2) . . . 4_556 ?
Cs3 U1 W1 U4 40.55(2) 4_455 . . 4_556 ?
O13 U1 W1 U2 -76.3(3) . . . . ?
O6 U1 W1 U2 103.8(3) . . . . ?
O14 U1 W1 U2 108(13) . . . . ?
O19 U1 W1 U2 13.7(3) . . . . ?
O7 U1 W1 U2 -164.4(4) . . . . ?
O1 U1 W1 U2 13.0(4) . . . . ?
O2 U1 W1 U2 -165.9(2) . . . . ?
U4 U1 W1 U2 -172.47(4) . . . . ?
U3 U1 W1 U2 2.18(5) . . . . ?
Cs1 U1 W1 U2 66.849(19) . . . . ?
Cs3 U1 W1 U2 -111.34(2) 4_455 . . . ?
O13 U1 W1 Cs1 -143.1(3) . . . . ?
O6 U1 W1 Cs1 37.0(3) . . . . ?
O14 U1 W1 Cs1 41(13) . . . . ?
O19 U1 W1 Cs1 -53.1(3) . . . . ?
O7 U1 W1 Cs1 128.7(4) . . . . ?
O1 U1 W1 Cs1 -53.8(4) . . . . ?
O2 U1 W1 Cs1 127.3(2) . . . . ?
U4 U1 W1 Cs1 120.68(4) . . . . ?
U3 U1 W1 Cs1 -64.67(4) . . . . ?
Cs3 U1 W1 Cs1 -178.19(2) 4_455 . . . ?
O13 U1 W1 Cs3 148.5(3) . . . . ?
O6 U1 W1 Cs3 -31.4(3) . . . . ?
O14 U1 W1 Cs3 -27(13) . . . . ?
O19 U1 W1 Cs3 -121.5(3) . . . . ?
O7 U1 W1 Cs3 60.3(4) . . . . ?
O1 U1 W1 Cs3 -122.2(4) . . . . ?
O2 U1 W1 Cs3 58.9(2) . . . . ?
U4 U1 W1 Cs3 52.28(4) . . . . ?
U3 U1 W1 Cs3 -133.07(4) . . . . ?
Cs1 U1 W1 Cs3 -68.40(2) . . . . ?
Cs3 U1 W1 Cs3 113.412(14) 4_455 . . . ?
O13 U1 W1 Cs3 178.4(3) . . . 4_556 ?
O6 U1 W1 Cs3 -1.5(3) . . . 4_556 ?
O14 U1 W1 Cs3 3(13) . . . 4_556 ?
O19 U1 W1 Cs3 -91.6(3) . . . 4_556 ?
O7 U1 W1 Cs3 90.2(4) . . . 4_556 ?
O1 U1 W1 Cs3 -92.3(4) . . . 4_556 ?
O2 U1 W1 Cs3 88.7(2) . . . 4_556 ?
U4 U1 W1 Cs3 82.16(5) . . . 4_556 ?
U3 U1 W1 Cs3 -103.18(5) . . . 4_556 ?
Cs1 U1 W1 Cs3 -38.52(3) . . . 4_556 ?
Cs3 U1 W1 Cs3 143.30(4) 4_455 . . 4_556 ?
O13 U1 W1 Cs3 7.0(3) . . . 1_455 ?
O6 U1 W1 Cs3 -172.9(3) . . . 1_455 ?
O14 U1 W1 Cs3 -169(100) . . . 1_455 ?
O19 U1 W1 Cs3 97.0(3) . . . 1_455 ?
O7 U1 W1 Cs3 -81.1(4) . . . 1_455 ?
O1 U1 W1 Cs3 96.3(4) . . . 1_455 ?
O2 U1 W1 Cs3 -82.6(2) . . . 1_455 ?
U4 U1 W1 Cs3 -89.18(4) . . . 1_455 ?
U3 U1 W1 Cs3 85.48(4) . . . 1_455 ?
Cs1 U1 W1 Cs3 150.14(2) . . . 1_455 ?
Cs3 U1 W1 Cs3 -28.04(3) 4_455 . . 1_455 ?
O17 U2 W1 O12 -3.7(4) . . . . ?
O23 U2 W1 O12 173.9(5) . . . . ?
O3 U2 W1 O12 -91.2(4) . . . . ?
O16 U2 W1 O12 57(2) . . . . ?
O5 U2 W1 O12 76.6(4) . . . . ?
O8 U2 W1 O12 -102.5(6) . . . . ?
O1 U2 W1 O12 95.1(5) . . . . ?
U4 U2 W1 O12 -84.9(3) 1_556 . . . ?
Cs1 U2 W1 O12 -140.9(3) 1_455 . . . ?
Cs1 U2 W1 O12 38.0(3) . . . . ?
Cs2 U2 W1 O12 26.2(3) . . . . ?
O17 U2 W1 O2 120.0(5) . . . 4_556 ?
O23 U2 W1 O2 -62.4(5) . . . 4_556 ?
O3 U2 W1 O2 32.5(4) . . . 4_556 ?
O16 U2 W1 O2 -179(2) . . . 4_556 ?
O5 U2 W1 O2 -159.8(5) . . . 4_556 ?
O8 U2 W1 O2 21.1(6) . . . 4_556 ?
O1 U2 W1 O2 -141.2(6) . . . 4_556 ?
U4 U2 W1 O2 38.8(4) 1_556 . . 4_556 ?
Cs1 U2 W1 O2 -17.2(4) 1_455 . . 4_556 ?
Cs1 U2 W1 O2 161.6(4) . . . 4_556 ?
Cs2 U2 W1 O2 149.9(4) . . . 4_556 ?
O17 U2 W1 O8 98.8(5) . . . . ?
O23 U2 W1 O8 -83.5(6) . . . . ?
O3 U2 W1 O8 11.3(5) . . . . ?
O16 U2 W1 O8 160(2) . . . . ?
O5 U2 W1 O8 179.1(5) . . . . ?
O1 U2 W1 O8 -162.4(6) . . . . ?
U4 U2 W1 O8 17.6(5) 1_556 . . . ?
Cs1 U2 W1 O8 -38.4(5) 1_455 . . . ?
Cs1 U2 W1 O8 140.5(5) . . . . ?
Cs2 U2 W1 O8 128.7(5) . . . . ?
O17 U2 W1 O7 -124.0(4) . . . . ?
O23 U2 W1 O7 53.7(5) . . . . ?
O3 U2 W1 O7 148.6(4) . . . . ?
O16 U2 W1 O7 -63(2) . . . . ?
O5 U2 W1 O7 -43.7(4) . . . . ?
O8 U2 W1 O7 137.2(6) . . . . ?
O1 U2 W1 O7 -25.2(5) . . . . ?
U4 U2 W1 O7 154.9(3) 1_556 . . . ?
Cs1 U2 W1 O7 98.8(3) 1_455 . . . ?
Cs1 U2 W1 O7 -82.3(3) . . . . ?
Cs2 U2 W1 O7 -94.0(3) . . . . ?
O17 U2 W1 O1 -98.8(5) . . . . ?
O23 U2 W1 O1 78.9(5) . . . . ?
O3 U2 W1 O1 173.7(5) . . . . ?
O16 U2 W1 O1 -38(2) . . . . ?
O5 U2 W1 O1 -18.5(5) . . . . ?
O8 U2 W1 O1 162.4(6) . . . . ?
U4 U2 W1 O1 -180.0(4) 1_556 . . . ?
Cs1 U2 W1 O1 124.0(4) 1_455 . . . ?
Cs1 U2 W1 O1 -57.1(4) . . . . ?
Cs2 U2 W1 O1 -68.9(4) . . . . ?
O17 U2 W1 U1 -111.6(3) . . . . ?
O23 U2 W1 U1 66.1(3) . . . . ?
O3 U2 W1 U1 160.9(2) . . . . ?
O16 U2 W1 U1 -51(2) . . . . ?
O5 U2 W1 U1 -31.3(3) . . . . ?
O8 U2 W1 U1 149.6(5) . . . . ?
O1 U2 W1 U1 -12.8(4) . . . . ?
U4 U2 W1 U1 167.250(19) 1_556 . . . ?
Cs1 U2 W1 U1 111.20(2) 1_455 . . . ?
Cs1 U2 W1 U1 -69.91(2) . . . . ?
Cs2 U2 W1 U1 -81.67(3) . . . . ?
O17 U2 W1 U4 -174.4(3) . . . 4_556 ?
O23 U2 W1 U4 3.3(3) . . . 4_556 ?
O3 U2 W1 U4 98.2(2) . . . 4_556 ?
O16 U2 W1 U4 -113(2) . . . 4_556 ?
O5 U2 W1 U4 -94.1(3) . . . 4_556 ?
O8 U2 W1 U4 86.8(5) . . . 4_556 ?
O1 U2 W1 U4 -75.6(4) . . . 4_556 ?
U4 U2 W1 U4 104.47(4) 1_556 . . 4_556 ?
Cs1 U2 W1 U4 48.43(4) 1_455 . . 4_556 ?
Cs1 U2 W1 U4 -132.69(4) . . . 4_556 ?
Cs2 U2 W1 U4 -144.44(4) . . . 4_556 ?
O17 U2 W1 Cs1 -41.7(3) . . . . ?
O23 U2 W1 Cs1 136.0(3) . . . . ?
O3 U2 W1 Cs1 -129.1(2) . . . . ?
O16 U2 W1 Cs1 19(2) . . . . ?
O5 U2 W1 Cs1 38.6(3) . . . . ?
O8 U2 W1 Cs1 -140.5(5) . . . . ?
O1 U2 W1 Cs1 57.1(4) . . . . ?
U4 U2 W1 Cs1 -122.84(2) 1_556 . . . ?
Cs1 U2 W1 Cs1 -178.88(3) 1_455 . . . ?
Cs2 U2 W1 Cs1 -11.75(3) . . . . ?
O17 U2 W1 Cs3 -53.9(3) . . . . ?
O23 U2 W1 Cs3 123.7(3) . . . . ?
O3 U2 W1 Cs3 -141.4(2) . . . . ?
O16 U2 W1 Cs3 7(2) . . . . ?
O5 U2 W1 Cs3 26.4(3) . . . . ?
O8 U2 W1 Cs3 -152.7(5) . . . . ?
O1 U2 W1 Cs3 44.9(4) . . . . ?
U4 U2 W1 Cs3 -135.09(3) 1_556 . . . ?
Cs1 U2 W1 Cs3 168.87(3) 1_455 . . . ?
Cs1 U2 W1 Cs3 -12.25(3) . . . . ?
Cs2 U2 W1 Cs3 -24.00(4) . . . . ?
O17 U2 W1 Cs3 30.4(3) . . . 4_556 ?
O23 U2 W1 Cs3 -152.0(3) . . . 4_556 ?
O3 U2 W1 Cs3 -57.1(2) . . . 4_556 ?
O16 U2 W1 Cs3 91(2) . . . 4_556 ?
O5 U2 W1 Cs3 110.6(3) . . . 4_556 ?
O8 U2 W1 Cs3 -68.5(5) . . . 4_556 ?
O1 U2 W1 Cs3 129.1(4) . . . 4_556 ?
U4 U2 W1 Cs3 -50.82(2) 1_556 . . 4_556 ?
Cs1 U2 W1 Cs3 -106.86(2) 1_455 . . 4_556 ?
Cs1 U2 W1 Cs3 72.02(2) . . . 4_556 ?
Cs2 U2 W1 Cs3 60.27(3) . . . 4_556 ?
O17 U2 W1 Cs3 146.8(3) . . . 1_455 ?
O23 U2 W1 Cs3 -35.6(3) . . . 1_455 ?
O3 U2 W1 Cs3 59.3(2) . . . 1_455 ?
O16 U2 W1 Cs3 -152(2) . . . 1_455 ?
O5 U2 W1 Cs3 -133.0(3) . . . 1_455 ?
O8 U2 W1 Cs3 47.9(5) . . . 1_455 ?
O1 U2 W1 Cs3 -114.4(4) . . . 1_455 ?
U4 U2 W1 Cs3 65.590(18) 1_556 . . 1_455 ?
Cs1 U2 W1 Cs3 9.54(2) 1_455 . . 1_455 ?
Cs1 U2 W1 Cs3 -171.57(2) . . . 1_455 ?
Cs2 U2 W1 Cs3 176.67(3) . . . 1_455 ?
O9 U3 W2 O20 -2.7(5) . . . . ?
O22 U3 W2 O20 179.5(5) . . . . ?
O14 U3 W2 O20 90.3(4) . . . . ?
O11 U3 W2 O20 -91.0(4) . . . . ?
O3 U3 W2 O20 53.2(6) 1_554 . . . ?
O4 U3 W2 O20 -100.2(6) . . . . ?
O19 U3 W2 O20 106.4(6) . . . . ?
U4 U3 W2 O20 82.0(4) . . . . ?
U1 U3 W2 O20 101.1(4) . . . . ?
Cs1 U3 W2 O20 -173.4(4) 1_454 . . . ?
Cs2 U3 W2 O20 -41.6(4) 3_554 . . . ?
O9 U3 W2 O5 -124.8(6) . . . . ?
O22 U3 W2 O5 57.5(6) . . . . ?
O14 U3 W2 O5 -31.8(6) . . . . ?
O11 U3 W2 O5 146.9(6) . . . . ?
O3 U3 W2 O5 -68.9(7) 1_554 . . . ?
O4 U3 W2 O5 137.7(7) . . . . ?
O19 U3 W2 O5 -15.7(7) . . . . ?
U4 U3 W2 O5 -40.1(5) . . . . ?
U1 U3 W2 O5 -21.0(5) . . . . ?
Cs1 U3 W2 O5 64.5(5) 1_454 . . . ?
Cs2 U3 W2 O5 -163.7(5) 3_554 . . . ?
O9 U3 W2 O19 -109.1(6) . . . . ?
O22 U3 W2 O19 73.2(6) . . . . ?
O14 U3 W2 O19 -16.1(6) . . . . ?
O11 U3 W2 O19 162.7(6) . . . . ?
O3 U3 W2 O19 -53.2(7) 1_554 . . . ?
O4 U3 W2 O19 153.5(6) . . . . ?
U4 U3 W2 O19 -24.4(5) . . . . ?
U1 U3 W2 O19 -5.2(5) . . . . ?
Cs1 U3 W2 O19 80.2(5) 1_454 . . . ?
Cs2 U3 W2 O19 -147.9(5) 3_554 . . . ?
O9 U3 W2 O10 114.2(4) . . . . ?
O22 U3 W2 O10 -63.5(4) . . . . ?
O14 U3 W2 O10 -152.8(4) . . . . ?
O11 U3 W2 O10 26.0(4) . . . . ?
O3 U3 W2 O10 170.1(6) 1_554 . . . ?
O4 U3 W2 O10 16.8(5) . . . . ?
O19 U3 W2 O10 -136.7(6) . . . . ?
U4 U3 W2 O10 -161.1(3) . . . . ?
U1 U3 W2 O10 -141.9(3) . . . . ?
Cs1 U3 W2 O10 -56.5(3) 1_454 . . . ?
Cs2 U3 W2 O10 75.4(3) 3_554 . . . ?
O9 U3 W2 O4 97.4(5) . . . . ?
O22 U3 W2 O4 -80.3(5) . . . . ?
O14 U3 W2 O4 -169.5(5) . . . . ?
O11 U3 W2 O4 9.2(5) . . . . ?
O3 U3 W2 O4 153.4(7) 1_554 . . . ?
O19 U3 W2 O4 -153.5(6) . . . . ?
U4 U3 W2 O4 -177.8(4) . . . . ?
U1 U3 W2 O4 -158.7(4) . . . . ?
Cs1 U3 W2 O4 -73.2(4) 1_454 . . . ?
Cs2 U3 W2 O4 58.6(4) 3_554 . . . ?
O9 U3 W2 W3 111.8(3) . . . 3_454 ?
O22 U3 W2 W3 -65.9(3) . . . 3_454 ?
O14 U3 W2 W3 -155.2(3) . . . 3_454 ?
O11 U3 W2 W3 23.5(3) . . . 3_454 ?
O3 U3 W2 W3 167.7(5) 1_554 . . 3_454 ?
O4 U3 W2 W3 14.3(4) . . . 3_454 ?
O19 U3 W2 W3 -139.1(5) . . . 3_454 ?
U4 U3 W2 W3 -163.51(2) . . . 3_454 ?
U1 U3 W2 W3 -144.366(19) . . . 3_454 ?
Cs1 U3 W2 W3 -58.92(4) 1_454 . . 3_454 ?
Cs2 U3 W2 W3 72.94(2) 3_554 . . 3_454 ?
O9 U3 W2 Cs2 38.8(3) . . . 3_554 ?
O22 U3 W2 Cs2 -138.9(3) . . . 3_554 ?
O14 U3 W2 Cs2 131.9(3) . . . 3_554 ?
O11 U3 W2 Cs2 -49.4(3) . . . 3_554 ?
O3 U3 W2 Cs2 94.8(5) 1_554 . . 3_554 ?
O4 U3 W2 Cs2 -58.6(4) . . . 3_554 ?
O19 U3 W2 Cs2 147.9(5) . . . 3_554 ?
U4 U3 W2 Cs2 123.55(3) . . . 3_554 ?
U1 U3 W2 Cs2 142.69(2) . . . 3_554 ?
Cs1 U3 W2 Cs2 -131.86(4) 1_454 . . 3_554 ?
O9 U3 W2 Cs1 -66.9(3) . . . . ?
O22 U3 W2 Cs1 115.4(3) . . . . ?
O14 U3 W2 Cs1 26.1(3) . . . . ?
O11 U3 W2 Cs1 -155.2(3) . . . . ?
O3 U3 W2 Cs1 -11.0(5) 1_554 . . . ?
O4 U3 W2 Cs1 -164.3(4) . . . . ?
O19 U3 W2 Cs1 42.2(5) . . . . ?
U4 U3 W2 Cs1 17.81(3) . . . . ?
U1 U3 W2 Cs1 36.95(2) . . . . ?
Cs1 U3 W2 Cs1 122.40(4) 1_454 . . . ?
Cs2 U3 W2 Cs1 -105.74(3) 3_554 . . . ?
O9 U3 W2 Cs2 -16.2(3) . . . . ?
O22 U3 W2 Cs2 166.0(3) . . . . ?
O14 U3 W2 Cs2 76.8(3) . . . . ?
O11 U3 W2 Cs2 -104.5(3) . . . . ?
O3 U3 W2 Cs2 39.7(6) 1_554 . . . ?
O4 U3 W2 Cs2 -113.7(4) . . . . ?
O19 U3 W2 Cs2 92.8(5) . . . . ?
U4 U3 W2 Cs2 68.47(11) . . . . ?
U1 U3 W2 Cs2 87.61(11) . . . . ?
Cs1 U3 W2 Cs2 173.06(9) 1_454 . . . ?
Cs2 U3 W2 Cs2 -55.08(11) 3_554 . . . ?
O9 U3 W2 Cs4 -175.1(3) . . . 1_455 ?
O22 U3 W2 Cs4 7.2(3) . . . 1_455 ?
O14 U3 W2 Cs4 -82.0(3) . . . 1_455 ?
O11 U3 W2 Cs4 96.7(3) . . . 1_455 ?
O3 U3 W2 Cs4 -119.2(5) 1_554 . . 1_455 ?
O4 U3 W2 Cs4 87.5(4) . . . 1_455 ?
O19 U3 W2 Cs4 -66.0(5) . . . 1_455 ?
U4 U3 W2 Cs4 -90.36(2) . . . 1_455 ?
U1 U3 W2 Cs4 -71.215(18) . . . 1_455 ?
Cs1 U3 W2 Cs4 14.23(4) 1_454 . . 1_455 ?
Cs2 U3 W2 Cs4 146.09(2) 3_554 . . 1_455 ?
O12 W1 O1 U1 103.4(4) . . . . ?
O2 W1 O1 U1 -72.1(8) 4_556 . . . ?
O8 W1 O1 U1 -149.2(4) . . . . ?
O7 W1 O1 U1 -1.7(4) . . . . ?
U4 W1 O1 U1 -17.7(5) 4_556 . . . ?
U2 W1 O1 U1 -160.9(6) . . . . ?
Cs1 W1 O1 U1 102.7(4) . . . . ?
Cs3 W1 O1 U1 52.7(3) . . . . ?
Cs3 W1 O1 U1 129.4(2) 4_556 . . . ?
Cs3 W1 O1 U1 -92.8(3) 1_455 . . . ?
O12 W1 O1 U2 -95.7(4) . . . . ?
O2 W1 O1 U2 88.7(8) 4_556 . . . ?
O8 W1 O1 U2 11.7(4) . . . . ?
O7 W1 O1 U2 159.2(4) . . . . ?
U1 W1 O1 U2 160.9(6) . . . . ?
U4 W1 O1 U2 143.19(18) 4_556 . . . ?
Cs1 W1 O1 U2 -96.4(4) . . . . ?
Cs3 W1 O1 U2 -146.5(3) . . . . ?
Cs3 W1 O1 U2 -69.8(4) 4_556 . . . ?
Cs3 W1 O1 U2 68.1(3) 1_455 . . . ?
O12 W1 O1 Cs1 0.7(4) . . . . ?
O2 W1 O1 Cs1 -174.9(6) 4_556 . . . ?
O8 W1 O1 Cs1 108.1(4) . . . . ?
O7 W1 O1 Cs1 -104.4(4) . . . . ?
U1 W1 O1 Cs1 -102.7(4) . . . . ?
U4 W1 O1 Cs1 -120.4(2) 4_556 . . . ?
U2 W1 O1 Cs1 96.4(4) . . . . ?
Cs3 W1 O1 Cs1 -50.1(2) . . . . ?
Cs3 W1 O1 Cs1 26.6(4) 4_556 . . . ?
Cs3 W1 O1 Cs1 164.48(15) 1_455 . . . ?
O13 U1 O1 W1 90.5(5) . . . . ?
O6 U1 O1 W1 -87.8(4) . . . . ?
O14 U1 O1 W1 -178.2(5) . . . . ?
O19 U1 O1 W1 -179.3(5) . . . . ?
O7 U1 O1 W1 1.5(4) . . . . ?
O2 U1 O1 W1 1.7(8) . . . . ?
U4 U1 O1 W1 -143(3) . . . . ?
U3 U1 O1 W1 174.1(2) . . . . ?
Cs1 U1 O1 W1 -104.7(4) . . . . ?
Cs3 U1 O1 W1 64.7(4) 4_455 . . . ?
O13 U1 O1 U2 -56.6(7) . . . . ?
O6 U1 O1 U2 125.1(7) . . . . ?
O14 U1 O1 U2 34.7(11) . . . . ?
O19 U1 O1 U2 33.6(7) . . . . ?
O7 U1 O1 U2 -145.6(8) . . . . ?
O2 U1 O1 U2 -145.4(6) . . . . ?
W1 U1 O1 U2 -147.1(10) . . . . ?
U4 U1 O1 U2 70(3) . . . . ?
U3 U1 O1 U2 27.0(8) . . . . ?
Cs1 U1 O1 U2 108.3(7) . . . . ?
Cs3 U1 O1 U2 -82.3(6) 4_455 . . . ?
O13 U1 O1 Cs1 -164.9(3) . . . . ?
O6 U1 O1 Cs1 16.8(3) . . . . ?
O14 U1 O1 Cs1 -73.6(7) . . . . ?
O19 U1 O1 Cs1 -74.7(3) . . . . ?
O7 U1 O1 Cs1 106.2(4) . . . . ?
O2 U1 O1 Cs1 106.3(5) . . . . ?
W1 U1 O1 Cs1 104.7(4) . . . . ?
U4 U1 O1 Cs1 -38(3) . . . . ?
U3 U1 O1 Cs1 -81.3(2) . . . . ?
Cs3 U1 O1 Cs1 169.40(9) 4_455 . . . ?
O17 U2 O1 W1 79.5(4) . . . . ?
O23 U2 O1 W1 -101.4(5) . . . . ?
O3 U2 O1 W1 -8.6(7) . . . . ?
O16 U2 O1 W1 173.7(4) . . . . ?
O5 U2 O1 W1 161.0(5) . . . . ?
O8 U2 O1 W1 -10.2(4) . . . . ?
U4 U2 O1 W1 0.0(4) 1_556 . . . ?
Cs1 U2 O1 W1 -69.5(4) 1_455 . . . ?
Cs1 U2 O1 W1 102.8(4) . . . . ?
Cs2 U2 O1 W1 124.6(3) . . . . ?
O17 U2 O1 U1 -133.3(7) . . . . ?
O23 U2 O1 U1 45.7(7) . . . . ?
O3 U2 O1 U1 138.6(6) . . . . ?
O16 U2 O1 U1 -39.1(10) . . . . ?
O5 U2 O1 U1 -51.9(7) . . . . ?
O8 U2 O1 U1 137.0(8) . . . . ?
W1 U2 O1 U1 147.2(10) . . . . ?
U4 U2 O1 U1 147.2(6) 1_556 . . . ?
Cs1 U2 O1 U1 77.6(7) 1_455 . . . ?
Cs1 U2 O1 U1 -110.0(7) . . . . ?
Cs2 U2 O1 U1 -88.2(7) . . . . ?
O17 U2 O1 Cs1 -23.3(3) . . . . ?
O23 U2 O1 Cs1 155.7(3) . . . . ?
O3 U2 O1 Cs1 -111.4(4) . . . . ?
O16 U2 O1 Cs1 70.9(6) . . . . ?
O5 U2 O1 Cs1 58.2(3) . . . . ?
O8 U2 O1 Cs1 -113.0(4) . . . . ?
W1 U2 O1 Cs1 -102.8(4) . . . . ?
U4 U2 O1 Cs1 -102.77(16) 1_556 . . . ?
Cs1 U2 O1 Cs1 -172.34(6) 1_455 . . . ?
Cs2 U2 O1 Cs1 21.8(2) . . . . ?
O13 U1 O2 W1 -126.1(9) . . . 4 ?
O6 U1 O2 W1 51.0(9) . . . 4 ?
O14 U1 O2 W1 142.5(10) . . . 4 ?
O19 U1 O2 W1 144.0(8) . . . 4 ?
O7 U1 O2 W1 -37.3(9) . . . 4 ?
O1 U1 O2 W1 -37.5(12) . . . 4 ?
W1 U1 O2 W1 -36.5(9) . . . 4 ?
U4 U1 O2 W1 138.5(11) . . . 4 ?
U3 U1 O2 W1 149.2(8) . . . 4 ?
Cs1 U1 O2 W1 34.1(10) . . . 4 ?
Cs3 U1 O2 W1 -122.4(9) 4_455 . . 4 ?
O13 U1 O2 U4 95.3(4) . . . . ?
O6 U1 O2 U4 -87.6(4) . . . . ?
O14 U1 O2 U4 3.9(3) . . . . ?
O19 U1 O2 U4 5.4(6) . . . . ?
O7 U1 O2 U4 -175.8(4) . . . . ?
O1 U1 O2 U4 -176.0(4) . . . . ?
W1 U1 O2 U4 -175.04(19) . . . . ?
U3 U1 O2 U4 10.7(3) . . . . ?
Cs1 U1 O2 U4 -104.5(3) . . . . ?
Cs3 U1 O2 U4 99.0(3) 4_455 . . . ?
O13 U1 O2 Cs3 -3.7(3) . . . 4_455 ?
O6 U1 O2 Cs3 173.4(3) . . . 4_455 ?
O14 U1 O2 Cs3 -95.1(3) . . . 4_455 ?
O19 U1 O2 Cs3 -93.6(5) . . . 4_455 ?
O7 U1 O2 Cs3 85.1(3) . . . 4_455 ?
O1 U1 O2 Cs3 85.0(5) . . . 4_455 ?
W1 U1 O2 Cs3 85.94(18) . . . 4_455 ?
U4 U1 O2 Cs3 -99.0(3) . . . 4_455 ?
U3 U1 O2 Cs3 -88.34(15) . . . 4_455 ?
Cs1 U1 O2 Cs3 156.52(9) . . . 4_455 ?
O15 U4 O2 W1 -76.8(4) . . . 4 ?
O18 U4 O2 W1 97.5(5) . . . 4 ?
O14 U4 O2 W1 -162.9(5) . . . 4 ?
O8 U4 O2 W1 12.8(9) 1_554 . . 4 ?
O3 U4 O2 W1 -179.9(4) 1_554 . . 4 ?
O7 U4 O2 W1 5.5(4) 4 . . 4 ?
U2 U4 O2 W1 -147.4(9) 1_554 . . 4 ?
U3 U4 O2 W1 -170.1(3) . . . 4 ?
U1 U4 O2 W1 -158.9(6) . . . 4 ?
Cs1 U4 O2 W1 130.1(3) 1_454 . . 4 ?
O15 U4 O2 U1 82.1(4) . . . . ?
O18 U4 O2 U1 -103.6(4) . . . . ?
O14 U4 O2 U1 -4.0(3) . . . . ?
O8 U4 O2 U1 171.7(5) 1_554 . . . ?
O3 U4 O2 U1 -21.0(6) 1_554 . . . ?
O7 U4 O2 U1 164.4(5) 4 . . . ?
W1 U4 O2 U1 158.9(6) 4 . . . ?
U2 U4 O2 U1 11.5(15) 1_554 . . . ?
U3 U4 O2 U1 -11.2(3) . . . . ?
Cs1 U4 O2 U1 -71.0(3) 1_454 . . . ?
O15 U4 O2 Cs3 176.0(3) . . . 4_455 ?
O18 U4 O2 Cs3 -9.7(3) . . . 4_455 ?
O14 U4 O2 Cs3 89.9(4) . . . 4_455 ?
O8 U4 O2 Cs3 -94.4(7) 1_554 . . 4_455 ?
O3 U4 O2 Cs3 72.9(5) 1_554 . . 4_455 ?
O7 U4 O2 Cs3 -101.7(3) 4 . . 4_455 ?
W1 U4 O2 Cs3 -107.2(4) 4 . . 4_455 ?
U2 U4 O2 Cs3 105.4(12) 1_554 . . 4_455 ?
U3 U4 O2 Cs3 82.68(17) . . . 4_455 ?
U1 U4 O2 Cs3 93.9(3) . . . 4_455 ?
Cs1 U4 O2 Cs3 22.9(3) 1_454 . . 4_455 ?
O17 U2 O3 U4 -74.2(4) . . . 1_556 ?
O23 U2 O3 U4 104.4(4) . . . 1_556 ?
O16 U2 O3 U4 -167.1(4) . . . 1_556 ?
O5 U2 O3 U4 -144.2(6) . . . 1_556 ?
O8 U2 O3 U4 15.8(3) . . . 1_556 ?
O1 U2 O3 U4 14.3(6) . . . 1_556 ?
W1 U2 O3 U4 9.7(4) . . . 1_556 ?
Cs1 U2 O3 U4 111.6(4) 1_455 . . 1_556 ?
Cs1 U2 O3 U4 -55.6(4) . . . 1_556 ?
Cs2 U2 O3 U4 -119.6(3) . . . 1_556 ?
O17 U2 O3 U3 66.0(7) . . . 1_556 ?
O23 U2 O3 U3 -115.3(7) . . . 1_556 ?
O16 U2 O3 U3 -26.8(6) . . . 1_556 ?
O5 U2 O3 U3 -3.9(12) . . . 1_556 ?
O8 U2 O3 U3 156.0(7) . . . 1_556 ?
O1 U2 O3 U3 154.6(5) . . . 1_556 ?
W1 U2 O3 U3 149.9(6) . . . 1_556 ?
U4 U2 O3 U3 140.3(9) 1_556 . . 1_556 ?
Cs1 U2 O3 U3 -108.2(7) 1_455 . . 1_556 ?
Cs1 U2 O3 U3 84.6(6) . . . 1_556 ?
Cs2 U2 O3 U3 20.7(7) . . . 1_556 ?
O17 U2 O3 Cs1 174.2(3) . . . 1_455 ?
O23 U2 O3 Cs1 -7.1(4) . . . 1_455 ?
O16 U2 O3 Cs1 81.4(3) . . . 1_455 ?
O5 U2 O3 Cs1 104.3(7) . . . 1_455 ?
O8 U2 O3 Cs1 -95.8(3) . . . 1_455 ?
O1 U2 O3 Cs1 -97.3(4) . . . 1_455 ?
W1 U2 O3 Cs1 -101.90(18) . . . 1_455 ?
U4 U2 O3 Cs1 -111.6(4) 1_556 . . 1_455 ?
Cs1 U2 O3 Cs1 -167.17(6) . . . 1_455 ?
Cs2 U2 O3 Cs1 128.87(16) . . . 1_455 ?
O20 W2 O4 W3 -114.6(5) . . . 3_454 ?
O5 W2 O4 W3 56.7(9) . . . 3_454 ?
O19 W2 O4 W3 139.9(5) . . . 3_454 ?
O10 W2 O4 W3 -5.9(4) . . . 3_454 ?
U3 W2 O4 W3 158.2(6) . . . 3_454 ?
Cs2 W2 O4 W3 -101.3(4) 3_554 . . 3_454 ?
Cs1 W2 O4 W3 -171.87(17) . . . 3_454 ?
Cs2 W2 O4 W3 -39.1(6) . . . 3_454 ?
Cs4 W2 O4 W3 81.4(3) 1_455 . . 3_454 ?
O20 W2 O4 U3 87.1(5) . . . . ?
O5 W2 O4 U3 -101.5(8) . . . . ?
O19 W2 O4 U3 -18.4(4) . . . . ?
O10 W2 O4 U3 -164.2(5) . . . . ?
W3 W2 O4 U3 -158.2(6) 3_454 . . . ?
Cs2 W2 O4 U3 100.4(4) 3_554 . . . ?
Cs1 W2 O4 U3 29.9(8) . . . . ?
Cs2 W2 O4 U3 162.71(11) . . . . ?
Cs4 W2 O4 U3 -76.8(3) 1_455 . . . ?
O20 W2 O4 Cs2 -13.3(4) . . . 3_554 ?
O5 W2 O4 Cs2 158.1(7) . . . 3_554 ?
O19 W2 O4 Cs2 -118.8(4) . . . 3_554 ?
O10 W2 O4 Cs2 95.4(4) . . . 3_554 ?
W3 W2 O4 Cs2 101.3(4) 3_454 . . 3_554 ?
U3 W2 O4 Cs2 -100.4(4) . . . 3_554 ?
Cs1 W2 O4 Cs2 -70.5(5) . . . 3_554 ?
Cs2 W2 O4 Cs2 62.3(5) . . . 3_554 ?
Cs4 W2 O4 Cs2 -177.2(3) 1_455 . . 3_554 ?
O9 U3 O4 W2 -78.3(5) . . . . ?
O22 U3 O4 W2 103.2(5) . . . . ?
O14 U3 O4 W2 12.7(6) . . . . ?
O11 U3 O4 W2 -171.4(5) . . . . ?
O3 U3 O4 W2 -140.9(11) 1_554 . . . ?
O19 U3 O4 W2 14.9(4) . . . . ?
U4 U3 O4 W2 4.4(9) . . . . ?
U1 U3 O4 W2 19.5(4) . . . . ?
Cs1 U3 O4 W2 138.7(3) 1_454 . . . ?
Cs2 U3 O4 W2 -100.0(5) 3_554 . . . ?
O9 U3 O4 W3 139.4(8) . . . 3_454 ?
O22 U3 O4 W3 -39.1(8) . . . 3_454 ?
O14 U3 O4 W3 -129.6(7) . . . 3_454 ?
O11 U3 O4 W3 46.3(7) . . . 3_454 ?
O3 U3 O4 W3 76.8(15) 1_554 . . 3_454 ?
O19 U3 O4 W3 -127.4(8) . . . 3_454 ?
W2 U3 O4 W3 -142.3(10) . . . 3_454 ?
U4 U3 O4 W3 -137.9(5) . . . 3_454 ?
U1 U3 O4 W3 -122.8(7) . . . 3_454 ?
Cs1 U3 O4 W3 -3.6(8) 1_454 . . 3_454 ?
Cs2 U3 O4 W3 117.7(8) 3_554 . . 3_454 ?
O9 U3 O4 Cs2 21.7(4) . . . 3_554 ?
O22 U3 O4 Cs2 -156.8(4) . . . 3_554 ?
O14 U3 O4 Cs2 112.7(4) . . . 3_554 ?
O11 U3 O4 Cs2 -71.4(3) . . . 3_554 ?
O3 U3 O4 Cs2 -40.9(14) 1_554 . . 3_554 ?
O19 U3 O4 Cs2 114.9(4) . . . 3_554 ?
W2 U3 O4 Cs2 100.0(5) . . . 3_554 ?
U4 U3 O4 Cs2 104.4(5) . . . 3_554 ?
U1 U3 O4 Cs2 119.53(18) . . . 3_554 ?
Cs1 U3 O4 Cs2 -121.3(2) 1_454 . . 3_554 ?
O20 W2 O5 U2 -156.4(11) . . . . ?
O19 W2 O5 U2 -47.6(11) . . . . ?
O10 W2 O5 U2 91.6(11) . . . . ?
O4 W2 O5 U2 32.4(16) . . . . ?
W3 W2 O5 U2 71.7(11) 3_454 . . . ?
U3 W2 O5 U2 -36.7(14) . . . . ?
Cs2 W2 O5 U2 175.1(5) 3_554 . . . ?
Cs1 W2 O5 U2 -119.3(12) . . . . ?
Cs2 W2 O5 U2 157.9(13) . . . . ?
Cs4 W2 O5 U2 8.9(10) 1_455 . . . ?
O20 W2 O5 Cs2 45.7(5) . . . . ?
O19 W2 O5 Cs2 154.5(4) . . . . ?
O10 W2 O5 Cs2 -66.3(4) . . . . ?
O4 W2 O5 Cs2 -125.5(7) . . . . ?
W3 W2 O5 Cs2 -86.1(4) 3_454 . . . ?
U3 W2 O5 Cs2 165.42(11) . . . . ?
Cs2 W2 O5 Cs2 17.2(8) 3_554 . . . ?
Cs1 W2 O5 Cs2 82.9(4) . . . . ?
Cs4 W2 O5 Cs2 -149.0(3) 1_455 . . . ?
O20 W2 O5 Cs1 -37.1(5) . . . . ?
O19 W2 O5 Cs1 71.6(4) . . . . ?
O10 W2 O5 Cs1 -149.1(4) . . . . ?
O4 W2 O5 Cs1 151.6(6) . . . . ?
W3 W2 O5 Cs1 -169.00(7) 3_454 . . . ?
U3 W2 O5 Cs1 82.6(5) . . . . ?
Cs2 W2 O5 Cs1 -65.7(6) 3_554 . . . ?
Cs2 W2 O5 Cs1 -82.9(4) . . . . ?
Cs4 W2 O5 Cs1 128.1(3) 1_455 . . . ?
O17 U2 O5 W2 161.0(11) . . . . ?
O23 U2 O5 W2 -16.6(11) . . . . ?
O3 U2 O5 W2 -127.4(10) . . . . ?
O16 U2 O5 W2 -103.5(11) . . . . ?
O8 U2 O5 W2 79.3(12) . . . . ?
O1 U2 O5 W2 68.5(11) . . . . ?
W1 U2 O5 W2 78.7(11) . . . . ?
U4 U2 O5 W2 133.9(9) 1_556 . . . ?
Cs1 U2 O5 W2 -49.3(12) 1_455 . . . ?
Cs1 U2 O5 W2 121.8(12) . . . . ?
Cs2 U2 O5 W2 -159.1(13) . . . . ?
O17 U2 O5 Cs2 -40.0(3) . . . . ?
O23 U2 O5 Cs2 142.4(4) . . . . ?
O3 U2 O5 Cs2 31.6(8) . . . . ?
O16 U2 O5 Cs2 55.6(3) . . . . ?
O8 U2 O5 Cs2 -121.6(4) . . . . ?
O1 U2 O5 Cs2 -132.4(4) . . . . ?
W1 U2 O5 Cs2 -122.29(17) . . . . ?
U4 U2 O5 Cs2 -67.0(7) 1_556 . . . ?
Cs1 U2 O5 Cs2 109.7(3) 1_455 . . . ?
Cs1 U2 O5 Cs2 -79.2(3) . . . . ?
O17 U2 O5 Cs1 39.2(3) . . . . ?
O23 U2 O5 Cs1 -138.4(3) . . . . ?
O3 U2 O5 Cs1 110.8(7) . . . . ?
O16 U2 O5 Cs1 134.7(4) . . . . ?
O8 U2 O5 Cs1 -42.5(5) . . . . ?
O1 U2 O5 Cs1 -53.3(3) . . . . ?
W1 U2 O5 Cs1 -43.1(2) . . . . ?
U4 U2 O5 Cs1 12.2(8) 1_556 . . . ?
Cs1 U2 O5 Cs1 -171.12(6) 1_455 . . . ?
Cs2 U2 O5 Cs1 79.2(3) . . . . ?
O13 U1 O6 Cs1 -52(8) . . . . ?
O14 U1 O6 Cs1 129.4(4) . . . . ?
O19 U1 O6 Cs1 61.9(4) . . . . ?
O7 U1 O6 Cs1 -82.8(4) . . . . ?
O1 U1 O6 Cs1 -18.1(3) . . . . ?
O2 U1 O6 Cs1 -161.7(3) . . . . ?
W1 U1 O6 Cs1 -50.6(3) . . . . ?
U4 U1 O6 Cs1 158.3(3) . . . . ?
U3 U1 O6 Cs1 101.1(3) . . . . ?
Cs3 U1 O6 Cs1 -152.5(2) 4_455 . . . ?
O13 U1 O6 Cs3 49(8) . . . . ?
O14 U1 O6 Cs3 -129.9(4) . . . . ?
O19 U1 O6 Cs3 162.6(4) . . . . ?
O7 U1 O6 Cs3 17.9(4) . . . . ?
O1 U1 O6 Cs3 82.6(4) . . . . ?
O2 U1 O6 Cs3 -61.0(4) . . . . ?
W1 U1 O6 Cs3 50.1(4) . . . . ?
U4 U1 O6 Cs3 -101.0(4) . . . . ?
U3 U1 O6 Cs3 -158.2(3) . . . . ?
Cs1 U1 O6 Cs3 100.7(5) . . . . ?
Cs3 U1 O6 Cs3 -51.8(7) 4_455 . . . ?
O13 U1 O6 Cs4 -167(7) . . . . ?
O14 U1 O6 Cs4 14.5(4) . . . . ?
O19 U1 O6 Cs4 -53.1(4) . . . . ?
O7 U1 O6 Cs4 162.3(4) . . . . ?
O1 U1 O6 Cs4 -133.1(4) . . . . ?
O2 U1 O6 Cs4 83.4(4) . . . . ?
W1 U1 O6 Cs4 -165.6(3) . . . . ?
U4 U1 O6 Cs4 43.3(3) . . . . ?
U3 U1 O6 Cs4 -13.9(4) . . . . ?
Cs1 U1 O6 Cs4 -115.0(5) . . . . ?
Cs3 U1 O6 Cs4 92.6(5) 4_455 . . . ?
O12 W1 O7 U1 -100.3(5) . . . . ?
O2 W1 O7 U1 154.4(4) 4_556 . . . ?
O8 W1 O7 U1 70.8(7) . . . . ?
O1 W1 O7 U1 1.7(4) . . . . ?
U4 W1 O7 U1 161.0(6) 4_556 . . . ?
U2 W1 O7 U1 18.7(5) . . . . ?
Cs1 W1 O7 U1 -47.3(4) . . . . ?
Cs3 W1 O7 U1 -98.1(4) . . . . ?
Cs3 W1 O7 U1 -130.0(2) 4_556 . . . ?
Cs3 W1 O7 U1 103.9(3) 1_455 . . . ?
O12 W1 O7 U4 98.7(5) . . . 4_556 ?
O2 W1 O7 U4 -6.7(4) 4_556 . . 4_556 ?
O8 W1 O7 U4 -90.2(6) . . . 4_556 ?
O1 W1 O7 U4 -159.3(5) . . . 4_556 ?
U1 W1 O7 U4 -161.0(6) . . . 4_556 ?
U2 W1 O7 U4 -142.3(2) . . . 4_556 ?
Cs1 W1 O7 U4 151.7(3) . . . 4_556 ?
Cs3 W1 O7 U4 100.9(4) . . . 4_556 ?
Cs3 W1 O7 U4 69.0(4) 4_556 . . 4_556 ?
Cs3 W1 O7 U4 -57.2(3) 1_455 . . 4_556 ?
O12 W1 O7 Cs3 -2.2(4) . . . . ?
O2 W1 O7 Cs3 -107.6(3) 4_556 . . . ?
O8 W1 O7 Cs3 168.9(5) . . . . ?
O1 W1 O7 Cs3 99.8(3) . . . . ?
U1 W1 O7 Cs3 98.1(4) . . . . ?
U4 W1 O7 Cs3 -100.9(4) 4_556 . . . ?
U2 W1 O7 Cs3 116.8(2) . . . . ?
Cs1 W1 O7 Cs3 50.81(19) . . . . ?
Cs3 W1 O7 Cs3 -31.9(3) 4_556 . . . ?
Cs3 W1 O7 Cs3 -158.05(16) 1_455 . . . ?
O13 U1 O7 W1 -91.4(5) . . . . ?
O6 U1 O7 W1 87.0(5) . . . . ?
O14 U1 O7 W1 178.2(5) . . . . ?
O19 U1 O7 W1 -2.9(8) . . . . ?
O1 U1 O7 W1 -1.5(4) . . . . ?
O2 U1 O7 W1 178.6(5) . . . . ?
U4 U1 O7 W1 175.5(2) . . . . ?
U3 U1 O7 W1 -123.0(13) . . . . ?
Cs1 U1 O7 W1 43.8(4) . . . . ?
Cs3 U1 O7 W1 -126.6(4) 4_455 . . . ?
O13 U1 O7 U4 58.3(7) . . . 4_556 ?
O6 U1 O7 U4 -123.3(7) . . . 4_556 ?
O14 U1 O7 U4 -32.1(11) . . . 4_556 ?
O19 U1 O7 U4 146.8(6) . . . 4_556 ?
O1 U1 O7 U4 148.2(8) . . . 4_556 ?
O2 U1 O7 U4 -31.7(6) . . . 4_556 ?
W1 U1 O7 U4 149.7(10) . . . 4_556 ?
U4 U1 O7 U4 -34.7(7) . . . 4_556 ?
U3 U1 O7 U4 27(2) . . . 4_556 ?
Cs1 U1 O7 U4 -166.5(6) . . . 4_556 ?
Cs3 U1 O7 U4 23.1(6) 4_455 . . 4_556 ?
O13 U1 O7 Cs3 167.9(3) . . . . ?
O6 U1 O7 Cs3 -13.7(3) . . . . ?
O14 U1 O7 Cs3 77.5(7) . . . . ?
O19 U1 O7 Cs3 -103.6(6) . . . . ?
O1 U1 O7 Cs3 -102.2(3) . . . . ?
O2 U1 O7 Cs3 77.9(3) . . . . ?
W1 U1 O7 Cs3 -100.7(4) . . . . ?
U4 U1 O7 Cs3 74.8(2) . . . . ?
U3 U1 O7 Cs3 136.3(14) . . . . ?
Cs1 U1 O7 Cs3 -56.91(15) . . . . ?
Cs3 U1 O7 Cs3 132.67(18) 4_455 . . . ?
O12 W1 O8 U4 -46.8(8) . . . 1_556 ?
O2 W1 O8 U4 59.7(7) 4_556 . . 1_556 ?
O7 W1 O8 U4 142.2(6) . . . 1_556 ?
O1 W1 O8 U4 -148.6(8) . . . 1_556 ?
U1 W1 O8 U4 -171.8(5) . . . 1_556 ?
U4 W1 O8 U4 85.1(8) 4_556 . . 1_556 ?
U2 W1 O8 U4 -136.6(10) . . . 1_556 ?
Cs1 W1 O8 U4 -100.4(7) . . . 1_556 ?
Cs3 W1 O8 U4 -62.9(11) . . . 1_556 ?
Cs3 W1 O8 U4 -21.1(7) 4_556 . . 1_556 ?
Cs3 W1 O8 U4 102.8(7) 1_455 . . 1_556 ?
O12 W1 O8 U2 89.8(5) . . . . ?
O2 W1 O8 U2 -163.7(5) 4_556 . . . ?
O7 W1 O8 U2 -81.2(7) . . . . ?
O1 W1 O8 U2 -12.0(4) . . . . ?
U1 W1 O8 U2 -35.2(5) . . . . ?
U4 W1 O8 U2 -138.3(2) 4_556 . . . ?
Cs1 W1 O8 U2 36.2(4) . . . . ?
Cs3 W1 O8 U2 73.7(8) . . . . ?
Cs3 W1 O8 U2 115.5(3) 4_556 . . . ?
Cs3 W1 O8 U2 -120.6(4) 1_455 . . . ?
O12 W1 O8 Cs3 -149.6(3) . . . 1_455 ?
O2 W1 O8 Cs3 -43.1(3) 4_556 . . 1_455 ?
O7 W1 O8 Cs3 39.4(7) . . . 1_455 ?
O1 W1 O8 Cs3 108.5(3) . . . 1_455 ?
U1 W1 O8 Cs3 85.3(2) . . . 1_455 ?
U4 W1 O8 Cs3 -17.7(4) 4_556 . . 1_455 ?
U2 W1 O8 Cs3 120.6(5) . . . 1_455 ?
Cs1 W1 O8 Cs3 156.77(12) . . . 1_455 ?
Cs3 W1 O8 Cs3 -165.8(5) . . . 1_455 ?
Cs3 W1 O8 Cs3 -123.92(17) 4_556 . . 1_455 ?
O17 U2 O8 W1 -79.5(5) . . . . ?
O23 U2 O8 W1 97.5(5) . . . . ?
O3 U2 O8 W1 -168.4(5) . . . . ?
O16 U2 O8 W1 -175.0(6) . . . . ?
O5 U2 O8 W1 -1.2(7) . . . . ?
O1 U2 O8 W1 10.4(4) . . . . ?
U4 U2 O8 W1 -152.8(7) 1_556 . . . ?
Cs1 U2 O8 W1 143.3(4) 1_455 . . . ?
Cs1 U2 O8 W1 -34.5(4) . . . . ?
Cs2 U2 O8 W1 -75.3(5) . . . . ?
O17 U2 O8 U4 73.3(4) . . . 1_556 ?
O23 U2 O8 U4 -109.7(4) . . . 1_556 ?
O3 U2 O8 U4 -15.6(3) . . . 1_556 ?
O16 U2 O8 U4 -22.2(10) . . . 1_556 ?
O5 U2 O8 U4 151.6(4) . . . 1_556 ?
O1 U2 O8 U4 163.2(5) . . . 1_556 ?
W1 U2 O8 U4 152.8(7) . . . 1_556 ?
Cs1 U2 O8 U4 -63.9(3) 1_455 . . 1_556 ?
Cs1 U2 O8 U4 118.3(3) . . . 1_556 ?
Cs2 U2 O8 U4 77.5(4) . . . 1_556 ?
O17 U2 O8 Cs3 175.0(4) . . . 1_455 ?
O23 U2 O8 Cs3 -8.0(4) . . . 1_455 ?
O3 U2 O8 Cs3 86.1(4) . . . 1_455 ?
O16 U2 O8 Cs3 79.5(9) . . . 1_455 ?
O5 U2 O8 Cs3 -106.7(5) . . . 1_455 ?
O1 U2 O8 Cs3 -95.1(4) . . . 1_455 ?
W1 U2 O8 Cs3 -105.5(5) . . . 1_455 ?
U4 U2 O8 Cs3 101.7(4) 1_556 . . 1_455 ?
Cs1 U2 O8 Cs3 37.8(2) 1_455 . . 1_455 ?
Cs1 U2 O8 Cs3 -140.0(3) . . . 1_455 ?
Cs2 U2 O8 Cs3 179.24(4) . . . 1_455 ?
O22 U3 O9 Cs4 160(10) . . . . ?
O14 U3 O9 Cs4 -2.4(6) . . . . ?
O11 U3 O9 Cs4 -157.9(6) . . . . ?
O3 U3 O9 Cs4 -72.3(6) 1_554 . . . ?
O4 U3 O9 Cs4 121.5(6) . . . . ?
O19 U3 O9 Cs4 61.3(6) . . . . ?
W2 U3 O9 Cs4 89.6(6) . . . . ?
U4 U3 O9 Cs4 -34.6(6) . . . . ?
U1 U3 O9 Cs4 25.8(6) . . . . ?
Cs1 U3 O9 Cs4 -97.1(6) 1_454 . . . ?
Cs2 U3 O9 Cs4 147.0(9) 3_554 . . . ?
O22 U3 O9 Cs2 13(11) . . . 3_554 ?
O14 U3 O9 Cs2 -149.4(4) . . . 3_554 ?
O11 U3 O9 Cs2 55.1(4) . . . 3_554 ?
O3 U3 O9 Cs2 140.8(4) 1_554 . . 3_554 ?
O4 U3 O9 Cs2 -25.5(4) . . . 3_554 ?
O19 U3 O9 Cs2 -85.7(4) . . . 3_554 ?
W2 U3 O9 Cs2 -57.4(3) . . . 3_554 ?
U4 U3 O9 Cs2 178.4(4) . . . 3_554 ?
U1 U3 O9 Cs2 -121.2(3) . . . 3_554 ?
Cs1 U3 O9 Cs2 116.0(3) 1_454 . . 3_554 ?
O20 W2 O10 W3 104.7(6) . . . 3_454 ?
O5 W2 O10 W3 -148.9(5) . . . 3_454 ?
O19 W2 O10 W3 -50.9(8) . . . 3_454 ?
O4 W2 O10 W3 6.8(4) . . . 3_454 ?
U3 W2 O10 W3 -4.2(5) . . . 3_454 ?
Cs2 W2 O10 W3 61.0(4) 3_554 . . 3_454 ?
Cs1 W2 O10 W3 177.21(15) . . . 3_454 ?
Cs2 W2 O10 W3 167.0(5) . . . 3_454 ?
Cs4 W2 O10 W3 -65.6(4) 1_455 . . 3_454 ?
O9 U3 O11 W3 28.2(7) . . . 1_554 ?
O22 U3 O11 W3 -153.4(7) . . . 1_554 ?
O14 U3 O11 W3 -74.9(11) . . . 1_554 ?
O3 U3 O11 W3 -59.1(7) 1_554 . . 1_554 ?
O4 U3 O11 W3 113.1(7) . . . 1_554 ?
O19 U3 O11 W3 121.8(7) . . . 1_554 ?
W2 U3 O11 W3 108.1(6) . . . 1_554 ?
U4 U3 O11 W3 -64.9(8) . . . 1_554 ?
U1 U3 O11 W3 -170.9(5) . . . 1_554 ?
Cs1 U3 O11 W3 -106.8(7) 1_454 . . 1_554 ?
Cs2 U3 O11 W3 63.0(6) 3_554 . . 1_554 ?
O9 U3 O11 Cs2 -159.7(4) . . . 1_454 ?
O22 U3 O11 Cs2 18.7(4) . . . 1_454 ?
O14 U3 O11 Cs2 97.3(8) . . . 1_454 ?
O3 U3 O11 Cs2 113.0(4) 1_554 . . 1_454 ?
O4 U3 O11 Cs2 -74.8(4) . . . 1_454 ?
O19 U3 O11 Cs2 -66.1(6) . . . 1_454 ?
W2 U3 O11 Cs2 -79.7(3) . . . 1_454 ?
U4 U3 O11 Cs2 107.2(3) . . . 1_454 ?
U1 U3 O11 Cs2 1.3(14) . . . 1_454 ?
Cs1 U3 O11 Cs2 65.4(3) 1_454 . . 1_454 ?
Cs2 U3 O11 Cs2 -124.9(3) 3_554 . . 1_454 ?
O9 U3 O11 Cs1 135.0(3) . . . 1_454 ?
O22 U3 O11 Cs1 -46.6(3) . . . 1_454 ?
O14 U3 O11 Cs1 31.9(9) . . . 1_454 ?
O3 U3 O11 Cs1 47.7(2) 1_554 . . 1_454 ?
O4 U3 O11 Cs1 -140.2(3) . . . 1_454 ?
O19 U3 O11 Cs1 -131.5(5) . . . 1_454 ?
W2 U3 O11 Cs1 -145.09(6) . . . 1_454 ?
U4 U3 O11 Cs1 41.9(2) . . . 1_454 ?
U1 U3 O11 Cs1 -64.1(12) . . . 1_454 ?
Cs2 U3 O11 Cs1 169.74(18) 3_554 . . 1_454 ?
O2 W1 O12 Cs3 -42.2(6) 4_556 . . 4_556 ?
O8 W1 O12 Cs3 52.5(6) . . . 4_556 ?
O7 W1 O12 Cs3 -132.8(5) . . . 4_556 ?
O1 W1 O12 Cs3 140.0(5) . . . 4_556 ?
U1 W1 O12 Cs3 -176.4(4) . . . 4_556 ?
U4 W1 O12 Cs3 -89.6(5) 4_556 . . 4_556 ?
U2 W1 O12 Cs3 95.6(5) . . . 4_556 ?
Cs1 W1 O12 Cs3 140.7(7) . . . 4_556 ?
Cs3 W1 O12 Cs3 -135.2(7) . . . 4_556 ?
Cs3 W1 O12 Cs3 -7.2(10) 1_455 . . 4_556 ?
O2 W1 O12 Cs1 177.1(3) 4_556 . . . ?
O8 W1 O12 Cs1 -88.1(4) . . . . ?
O7 W1 O12 Cs1 86.5(4) . . . . ?
O1 W1 O12 Cs1 -0.7(4) . . . . ?
U1 W1 O12 Cs1 42.9(3) . . . . ?
U4 W1 O12 Cs1 129.76(19) 4_556 . . . ?
U2 W1 O12 Cs1 -45.1(3) . . . . ?
Cs3 W1 O12 Cs1 84.2(3) . . . . ?
Cs3 W1 O12 Cs1 -140.7(7) 4_556 . . . ?
Cs3 W1 O12 Cs1 -147.9(4) 1_455 . . . ?
O2 W1 O12 Cs3 92.9(4) 4_556 . . . ?
O8 W1 O12 Cs3 -172.3(3) . . . . ?
O7 W1 O12 Cs3 2.3(4) . . . . ?
O1 W1 O12 Cs3 -84.8(4) . . . . ?
U1 W1 O12 Cs3 -41.2(3) . . . . ?
U4 W1 O12 Cs3 45.6(3) 4_556 . . . ?
U2 W1 O12 Cs3 -129.3(2) . . . . ?
Cs1 W1 O12 Cs3 -84.2(3) . . . . ?
Cs3 W1 O12 Cs3 135.2(7) 4_556 . . . ?
Cs3 W1 O12 Cs3 128.0(4) 1_455 . . . ?
O6 U1 O13 Cs3 -104(8) . . . 4_455 ?
O14 U1 O13 Cs3 73.9(5) . . . 4_455 ?
O19 U1 O13 Cs3 141.4(5) . . . 4_455 ?
O7 U1 O13 Cs3 -73.9(5) . . . 4_455 ?
O1 U1 O13 Cs3 -138.5(5) . . . 4_455 ?
O2 U1 O13 Cs3 5.1(5) . . . 4_455 ?
W1 U1 O13 Cs3 -106.0(4) . . . 4_455 ?
U4 U1 O13 Cs3 45.0(4) . . . 4_455 ?
U3 U1 O13 Cs3 102.1(4) . . . 4_455 ?
Cs1 U1 O13 Cs3 -154.2(2) . . . 4_455 ?
O6 U1 O13 Cs4 104(8) . . . 1_455 ?
O14 U1 O13 Cs4 -77.2(5) . . . 1_455 ?
O19 U1 O13 Cs4 -9.7(5) . . . 1_455 ?
O7 U1 O13 Cs4 135.0(5) . . . 1_455 ?
O1 U1 O13 Cs4 70.4(5) . . . 1_455 ?
O2 U1 O13 Cs4 -146.0(5) . . . 1_455 ?
W1 U1 O13 Cs4 102.9(5) . . . 1_455 ?
U4 U1 O13 Cs4 -106.1(5) . . . 1_455 ?
U3 U1 O13 Cs4 -49.0(5) . . . 1_455 ?
Cs1 U1 O13 Cs4 54.7(7) . . . 1_455 ?
Cs3 U1 O13 Cs4 -151.1(9) 4_455 . . 1_455 ?
O15 U4 O14 U1 -89.3(6) . . . . ?
O18 U4 O14 U1 87.7(6) . . . . ?
O8 U4 O14 U1 -171.5(4) 1_554 . . . ?
O3 U4 O14 U1 172.9(6) 1_554 . . . ?
O7 U4 O14 U1 -8.4(8) 4 . . . ?
O2 U4 O14 U1 5.1(4) . . . . ?
W1 U4 O14 U1 -3.9(5) 4 . . . ?
U2 U4 O14 U1 -172.0(4) 1_554 . . . ?
U3 U4 O14 U1 171.9(9) . . . . ?
Cs1 U4 O14 U1 131.1(5) 1_454 . . . ?
O15 U4 O14 U3 98.8(5) . . . . ?
O18 U4 O14 U3 -84.2(5) . . . . ?
O8 U4 O14 U3 16.6(9) 1_554 . . . ?
O3 U4 O14 U3 1.0(4) 1_554 . . . ?
O7 U4 O14 U3 179.7(4) 4 . . . ?
O2 U4 O14 U3 -166.8(6) . . . . ?
W1 U4 O14 U3 -175.8(4) 4 . . . ?
U2 U4 O14 U3 16.1(5) 1_554 . . . ?
U1 U4 O14 U3 -171.9(9) . . . . ?
Cs1 U4 O14 U3 -40.9(4) 1_454 . . . ?
O13 U1 O14 U4 -94.5(6) . . . . ?
O6 U1 O14 U4 85.4(6) . . . . ?
O19 U1 O14 U4 175.9(7) . . . . ?
O7 U1 O14 U4 -4.8(10) . . . . ?
O1 U1 O14 U4 174.7(4) . . . . ?
O2 U1 O14 U4 -5.2(5) . . . . ?
W1 U1 O14 U4 81(14) . . . . ?
U3 U1 O14 U4 -171.3(10) . . . . ?
Cs1 U1 O14 U4 122.1(4) . . . . ?
Cs3 U1 O14 U4 -59.5(5) 4_455 . . . ?
O13 U1 O14 U3 76.8(6) . . . . ?
O6 U1 O14 U3 -103.3(6) . . . . ?
O19 U1 O14 U3 -12.8(5) . . . . ?
O7 U1 O14 U3 166.4(4) . . . . ?
O1 U1 O14 U3 -14.0(10) . . . . ?
O2 U1 O14 U3 166.0(7) . . . . ?
W1 U1 O14 U3 -108(13) . . . . ?
U4 U1 O14 U3 171.3(10) . . . . ?
Cs1 U1 O14 U3 -66.7(6) . . . . ?
Cs3 U1 O14 U3 111.8(5) 4_455 . . . ?
O9 U3 O14 U4 -87.1(5) . . . . ?
O22 U3 O14 U4 93.7(5) . . . . ?
O11 U3 O14 U4 15.8(11) . . . . ?
O3 U3 O14 U4 -1.0(4) 1_554 . . . ?
O4 U3 O14 U4 -173.7(4) . . . . ?
O19 U3 O14 U4 -175.9(6) . . . . ?
W2 U3 O14 U4 -167.0(4) . . . . ?
U1 U3 O14 U4 171.9(9) . . . . ?
Cs1 U3 O14 U4 44.9(4) 1_454 . . . ?
Cs2 U3 O14 U4 -111.8(4) 3_554 . . . ?
O9 U3 O14 U1 101.1(6) . . . . ?
O22 U3 O14 U1 -78.2(6) . . . . ?
O11 U3 O14 U1 -156.1(6) . . . . ?
O3 U3 O14 U1 -172.8(6) 1_554 . . . ?
O4 U3 O14 U1 14.5(7) . . . . ?
O19 U3 O14 U1 12.3(5) . . . . ?
W2 U3 O14 U1 21.1(5) . . . . ?
U4 U3 O14 U1 -171.9(9) . . . . ?
Cs1 U3 O14 U1 -126.9(5) 1_454 . . . ?
Cs2 U3 O14 U1 76.4(6) 3_554 . . . ?
O18 U4 O15 Cs4 -174(4) . . . . ?
O14 U4 O15 Cs4 -24.0(6) . . . . ?
O8 U4 O15 Cs4 118.3(6) 1_554 . . . ?
O3 U4 O15 Cs4 46.6(6) 1_554 . . . ?
O7 U4 O15 Cs4 -154.2(6) 4 . . . ?
O2 U4 O15 Cs4 -91.2(5) . . . . ?
W1 U4 O15 Cs4 -122.3(5) 4 . . . ?
U2 U4 O15 Cs4 78.7(5) 1_554 . . . ?
U3 U4 O15 Cs4 8.5(5) . . . . ?
U1 U4 O15 Cs4 -53.1(5) . . . . ?
Cs1 U4 O15 Cs4 52.1(8) 1_454 . . . ?
O18 U4 O15 Cs3 -5(5) . . . 4 ?
O14 U4 O15 Cs3 145.0(5) . . . 4 ?
O8 U4 O15 Cs3 -72.7(5) 1_554 . . 4 ?
O3 U4 O15 Cs3 -144.4(4) 1_554 . . 4 ?
O7 U4 O15 Cs3 14.8(4) 4 . . 4 ?
O2 U4 O15 Cs3 77.8(5) . . . 4 ?
W1 U4 O15 Cs3 46.7(4) 4 . . 4 ?
U2 U4 O15 Cs3 -112.3(4) 1_554 . . 4 ?
U3 U4 O15 Cs3 177.5(4) . . . 4 ?
U1 U4 O15 Cs3 115.9(4) . . . 4 ?
Cs1 U4 O15 Cs3 -138.9(3) 1_454 . . 4 ?
O21 W3 O16 U2 120.0(15) . . . . ?
O11 W3 O16 U2 3.6(15) 1_556 . . . ?
O10 W3 O16 U2 -121.8(15) 3_454 . . . ?
O4 W3 O16 U2 -90(2) 3_454 . . . ?
W2 W3 O16 U2 -120.7(13) 3_454 . . . ?
Cs2 W3 O16 U2 124.9(16) . . . . ?
Cs2 W3 O16 U2 -38.4(16) 1_455 . . . ?
Cs2 W3 O16 U2 79.7(15) 3 . . . ?
O21 W3 O16 Cs2 -4.9(4) . . . . ?
O11 W3 O16 Cs2 -121.3(4) 1_556 . . . ?
O10 W3 O16 Cs2 113.3(4) 3_454 . . . ?
O4 W3 O16 Cs2 145.3(14) 3_454 . . . ?
W2 W3 O16 Cs2 114.4(3) 3_454 . . . ?
Cs2 W3 O16 Cs2 -163.27(7) 1_455 . . . ?
Cs2 W3 O16 Cs2 -45.1(3) 3 . . . ?
O17 U2 O16 W3 -98.4(15) . . . . ?
O23 U2 O16 W3 84.1(15) . . . . ?
O3 U2 O16 W3 -9.9(15) . . . . ?
O5 U2 O16 W3 -178.8(16) . . . . ?
O8 U2 O16 W3 -4(2) . . . . ?
O1 U2 O16 W3 168.4(12) . . . . ?
W1 U2 O16 W3 -158.8(11) . . . . ?
U4 U2 O16 W3 -18.7(16) 1_556 . . . ?
Cs1 U2 O16 W3 38.7(14) 1_455 . . . ?
Cs1 U2 O16 W3 -140.5(14) . . . . ?
Cs2 U2 O16 W3 -125.6(16) . . . . ?
O17 U2 O16 Cs2 27.2(3) . . . . ?
O23 U2 O16 Cs2 -150.3(4) . . . . ?
O3 U2 O16 Cs2 115.7(3) . . . . ?
O5 U2 O16 Cs2 -53.2(3) . . . . ?
O8 U2 O16 Cs2 122.0(7) . . . . ?
O1 U2 O16 Cs2 -66.0(6) . . . . ?
W1 U2 O16 Cs2 -33(3) . . . . ?
U4 U2 O16 Cs2 106.90(19) 1_556 . . . ?
Cs1 U2 O16 Cs2 164.3(2) 1_455 . . . ?
Cs1 U2 O16 Cs2 -14.9(3) . . . . ?
O23 U2 O17 Cs1 6(8) . . . . ?
O3 U2 O17 Cs1 159.9(3) . . . . ?
O16 U2 O17 Cs1 -117.8(4) . . . . ?
O5 U2 O17 Cs1 -46.6(3) . . . . ?
O8 U2 O17 Cs1 87.6(3) . . . . ?
O1 U2 O17 Cs1 25.4(3) . . . . ?
W1 U2 O17 Cs1 56.9(3) . . . . ?
U4 U2 O17 Cs1 124.0(3) 1_556 . . . ?
Cs1 U2 O17 Cs1 166.18(9) 1_455 . . . ?
Cs2 U2 O17 Cs1 -88.5(4) . . . . ?
O23 U2 O17 Cs2 95(8) . . . . ?
O3 U2 O17 Cs2 -111.6(3) . . . . ?
O16 U2 O17 Cs2 -29.3(4) . . . . ?
O5 U2 O17 Cs2 41.9(3) . . . . ?
O8 U2 O17 Cs2 176.1(3) . . . . ?
O1 U2 O17 Cs2 113.8(3) . . . . ?
W1 U2 O17 Cs2 145.3(3) . . . . ?
U4 U2 O17 Cs2 -147.6(3) 1_556 . . . ?
Cs1 U2 O17 Cs2 -105.3(3) 1_455 . . . ?
Cs1 U2 O17 Cs2 88.5(4) . . . . ?
O23 U2 O17 Cs4 -154(8) . . . 1_556 ?
O3 U2 O17 Cs4 -0.7(5) . . . 1_556 ?
O16 U2 O17 Cs4 81.7(6) . . . 1_556 ?
O5 U2 O17 Cs4 152.8(6) . . . 1_556 ?
O8 U2 O17 Cs4 -73.0(5) . . . 1_556 ?
O1 U2 O17 Cs4 -135.2(5) . . . 1_556 ?
W1 U2 O17 Cs4 -103.7(5) . . . 1_556 ?
U4 U2 O17 Cs4 -36.6(5) 1_556 . . 1_556 ?
Cs1 U2 O17 Cs4 5.6(8) 1_455 . . 1_556 ?
Cs1 U2 O17 Cs4 -160.6(8) . . . 1_556 ?
Cs2 U2 O17 Cs4 110.9(7) . . . 1_556 ?
O15 U4 O18 Cs3 -46(4) . . . 1_454 ?
O14 U4 O18 Cs3 165.1(4) . . . 1_454 ?
O8 U4 O18 Cs3 22.4(4) 1_554 . . 1_454 ?
O3 U4 O18 Cs3 94.6(4) 1_554 . . 1_454 ?
O7 U4 O18 Cs3 -64.9(4) 4 . . 1_454 ?
O2 U4 O18 Cs3 -128.3(4) . . . 1_454 ?
W1 U4 O18 Cs3 -96.7(4) 4 . . 1_454 ?
U2 U4 O18 Cs3 61.4(4) 1_554 . . 1_454 ?
U3 U4 O18 Cs3 132.3(3) . . . 1_454 ?
U1 U4 O18 Cs3 -165.7(3) . . . 1_454 ?
Cs1 U4 O18 Cs3 92.9(5) 1_454 . . 1_454 ?
O15 U4 O18 Cs3 94(4) . . . 4_455 ?
O14 U4 O18 Cs3 -54.8(4) . . . 4_455 ?
O8 U4 O18 Cs3 162.5(4) 1_554 . . 4_455 ?
O3 U4 O18 Cs3 -125.3(4) 1_554 . . 4_455 ?
O7 U4 O18 Cs3 75.2(4) 4 . . 4_455 ?
O2 U4 O18 Cs3 11.8(4) . . . 4_455 ?
W1 U4 O18 Cs3 43.4(4) 4 . . 4_455 ?
U2 U4 O18 Cs3 -158.4(3) 1_554 . . 4_455 ?
U3 U4 O18 Cs3 -87.6(4) . . . 4_455 ?
U1 U4 O18 Cs3 -25.6(4) . . . 4_455 ?
Cs1 U4 O18 Cs3 -127.0(6) 1_454 . . 4_455 ?
O15 U4 O18 Cs1 -139(4) . . . 1_454 ?
O14 U4 O18 Cs1 72.2(4) . . . 1_454 ?
O8 U4 O18 Cs1 -70.5(4) 1_554 . . 1_454 ?
O3 U4 O18 Cs1 1.7(3) 1_554 . . 1_454 ?
O7 U4 O18 Cs1 -157.8(4) 4 . . 1_454 ?
O2 U4 O18 Cs1 138.8(4) . . . 1_454 ?
W1 U4 O18 Cs1 170.4(3) 4 . . 1_454 ?
U2 U4 O18 Cs1 -31.5(3) 1_554 . . 1_454 ?
U3 U4 O18 Cs1 39.4(3) . . . 1_454 ?
U1 U4 O18 Cs1 101.4(3) . . . 1_454 ?
O20 W2 O19 U1 81.0(11) . . . . ?
O5 W2 O19 U1 -26.0(11) . . . . ?
O10 W2 O19 U1 -122.8(10) . . . . ?
O4 W2 O19 U1 -178.5(11) . . . . ?
W3 W2 O19 U1 -151.3(9) 3_454 . . . ?
U3 W2 O19 U1 164.6(14) . . . . ?
Cs2 W2 O19 U1 133.2(10) 3_554 . . . ?
Cs1 W2 O19 U1 23.8(10) . . . . ?
Cs2 W2 O19 U1 0.5(14) . . . . ?
Cs4 W2 O19 U1 -105.4(11) 1_455 . . . ?
O20 W2 O19 U3 -83.6(5) . . . . ?
O5 W2 O19 U3 169.4(5) . . . . ?
O10 W2 O19 U3 72.6(7) . . . . ?
O4 W2 O19 U3 16.9(4) . . . . ?
W3 W2 O19 U3 44.1(5) 3_454 . . . ?
Cs2 W2 O19 U3 -31.4(4) 3_554 . . . ?
Cs1 W2 O19 U3 -140.8(4) . . . . ?
Cs2 W2 O19 U3 -164.04(10) . . . . ?
Cs4 W2 O19 U3 90.1(4) 1_455 . . . ?
O13 U1 O19 W2 113.7(11) . . . . ?
O6 U1 O19 W2 -63.4(11) . . . . ?
O14 U1 O19 W2 -155.0(12) . . . . ?
O7 U1 O19 W2 25.7(15) . . . . ?
O1 U1 O19 W2 24.4(11) . . . . ?
O2 U1 O19 W2 -156.5(9) . . . . ?
W1 U1 O19 W2 24.0(12) . . . . ?
U4 U1 O19 W2 -153.0(10) . . . . ?
U3 U1 O19 W2 -164.7(14) . . . . ?
Cs1 U1 O19 W2 -23.9(10) . . . . ?
Cs3 U1 O19 W2 138.3(10) 4_455 . . . ?
O13 U1 O19 U3 -81.6(4) . . . . ?
O6 U1 O19 U3 101.3(4) . . . . ?
O14 U1 O19 U3 9.7(4) . . . . ?
O7 U1 O19 U3 -169.6(4) . . . . ?
O1 U1 O19 U3 -171.0(4) . . . . ?
O2 U1 O19 U3 8.2(7) . . . . ?
W1 U1 O19 U3 -171.3(2) . . . . ?
U4 U1 O19 U3 11.7(3) . . . . ?
Cs1 U1 O19 U3 140.8(4) . . . . ?
Cs3 U1 O19 U3 -57.0(4) 4_455 . . . ?
O9 U3 O19 W2 68.5(5) . . . . ?
O22 U3 O19 W2 -109.2(5) . . . . ?
O14 U3 O19 W2 162.1(6) . . . . ?
O11 U3 O19 W2 -25.7(8) . . . . ?
O3 U3 O19 W2 155.5(4) 1_554 . . . ?
O4 U3 O19 W2 -15.8(4) . . . . ?
U4 U3 O19 W2 159.9(4) . . . . ?
U1 U3 O19 W2 171.9(8) . . . . ?
Cs1 U3 O19 W2 -133.8(3) 1_454 . . . ?
Cs2 U3 O19 W2 27.8(4) 3_554 . . . ?
O9 U3 O19 U1 -103.4(4) . . . . ?
O22 U3 O19 U1 78.9(4) . . . . ?
O14 U3 O19 U1 -9.8(4) . . . . ?
O11 U3 O19 U1 162.4(4) . . . . ?
O3 U3 O19 U1 -16.4(6) 1_554 . . . ?
O4 U3 O19 U1 172.2(5) . . . . ?
W2 U3 O19 U1 -171.9(8) . . . . ?
U4 U3 O19 U1 -12.1(4) . . . . ?
Cs1 U3 O19 U1 54.3(5) 1_454 . . . ?
Cs2 U3 O19 U1 -144.1(3) 3_554 . . . ?
O5 W2 O20 Cs2 -161.7(4) . . . 3_554 ?
O19 W2 O20 Cs2 98.9(4) . . . 3_554 ?
O10 W2 O20 Cs2 -64.6(5) . . . 3_554 ?
O4 W2 O20 Cs2 14.2(4) . . . 3_554 ?
W3 W2 O20 Cs2 -27.1(5) 3_454 . . 3_554 ?
U3 W2 O20 Cs2 54.5(3) . . . 3_554 ?
Cs1 W2 O20 Cs2 166.1(5) . . . 3_554 ?
Cs2 W2 O20 Cs2 -128.2(4) . . . 3_554 ?
Cs4 W2 O20 Cs2 79.8(13) 1_455 . . 3_554 ?
O5 W2 O20 Cs1 32.2(4) . . . . ?
O19 W2 O20 Cs1 -67.2(4) . . . . ?
O10 W2 O20 Cs1 129.3(3) . . . . ?
O4 W2 O20 Cs1 -151.9(3) . . . . ?
W3 W2 O20 Cs1 166.75(5) 3_454 . . . ?
U3 W2 O20 Cs1 -111.59(18) . . . . ?
Cs2 W2 O20 Cs1 -166.1(5) 3_554 . . . ?
Cs2 W2 O20 Cs1 65.67(18) . . . . ?
Cs4 W2 O20 Cs1 -86.3(13) 1_455 . . . ?
O11 W3 O21 Cs2 107.7(4) 1_556 . . . ?
O16 W3 O21 Cs2 5.5(5) . . . . ?
O10 W3 O21 Cs2 -96.4(5) 3_454 . . . ?
O4 W3 O21 Cs2 -167.5(4) 3_454 . . . ?
W2 W3 O21 Cs2 -131.8(3) 3_454 . . . ?
Cs2 W3 O21 Cs2 160.07(11) 1_455 . . . ?
Cs2 W3 O21 Cs2 109.6(6) 3 . . . ?
O11 W3 O21 Cs2 -2.0(6) 1_556 . . 3 ?
O16 W3 O21 Cs2 -104.2(5) . . . 3 ?
O10 W3 O21 Cs2 154.0(4) 3_454 . . 3 ?
O4 W3 O21 Cs2 82.8(5) 3_454 . . 3 ?
W2 W3 O21 Cs2 118.5(4) 3_454 . . 3 ?
Cs2 W3 O21 Cs2 -109.6(6) . . . 3 ?
Cs2 W3 O21 Cs2 50.4(6) 1_455 . . 3 ?
O11 W3 O21 Cs4 -136.6(5) 1_556 . . 3_554 ?
O16 W3 O21 Cs4 121.2(5) . . . 3_554 ?
O10 W3 O21 Cs4 19.3(7) 3_454 . . 3_554 ?
O4 W3 O21 Cs4 -51.8(5) 3_454 . . 3_554 ?
W2 W3 O21 Cs4 -16.1(5) 3_454 . . 3_554 ?
Cs2 W3 O21 Cs4 115.7(7) . . . 3_554 ?
Cs2 W3 O21 Cs4 -84.2(6) 1_455 . . 3_554 ?
Cs2 W3 O21 Cs4 -134.7(8) 3 . . 3_554 ?
O9 U3 O22 Cs1 105(11) . . . 1_454 ?
O14 U3 O22 Cs1 -92.5(4) . . . 1_454 ?
O11 U3 O22 Cs1 62.8(3) . . . 1_454 ?
O3 U3 O22 Cs1 -22.6(3) 1_554 . . 1_454 ?
O4 U3 O22 Cs1 143.4(3) . . . 1_454 ?
O19 U3 O22 Cs1 -156.3(3) . . . 1_454 ?
W2 U3 O22 Cs1 175.0(2) . . . 1_454 ?
U4 U3 O22 Cs1 -60.4(3) . . . 1_454 ?
U1 U3 O22 Cs1 -120.5(3) . . . 1_454 ?
Cs2 U3 O22 Cs1 117.4(3) 3_554 . . 1_454 ?
O9 U3 O22 Cs4 -82(11) . . . 1_455 ?
O14 U3 O22 Cs4 80.4(5) . . . 1_455 ?
O11 U3 O22 Cs4 -124.3(5) . . . 1_455 ?
O3 U3 O22 Cs4 150.3(5) 1_554 . . 1_455 ?
O4 U3 O22 Cs4 -43.7(5) . . . 1_455 ?
O19 U3 O22 Cs4 16.6(5) . . . 1_455 ?
W2 U3 O22 Cs4 -12.1(5) . . . 1_455 ?
U4 U3 O22 Cs4 112.5(4) . . . 1_455 ?
U1 U3 O22 Cs4 52.4(4) . . . 1_455 ?
Cs1 U3 O22 Cs4 172.9(7) 1_454 . . 1_455 ?
Cs2 U3 O22 Cs4 -69.7(7) 3_554 . . 1_455 ?
O9 U3 O22 Cs2 26(11) . . . 1_454 ?
O14 U3 O22 Cs2 -171.1(4) . . . 1_454 ?
O11 U3 O22 Cs2 -15.7(3) . . . 1_454 ?
O3 U3 O22 Cs2 -101.2(3) 1_554 . . 1_454 ?
O4 U3 O22 Cs2 64.9(3) . . . 1_454 ?
O19 U3 O22 Cs2 125.1(3) . . . 1_454 ?
W2 U3 O22 Cs2 96.5(3) . . . 1_454 ?
U4 U3 O22 Cs2 -138.9(3) . . . 1_454 ?
U1 U3 O22 Cs2 160.9(3) . . . 1_454 ?
Cs1 U3 O22 Cs2 -78.6(3) 1_454 . . 1_454 ?
Cs2 U3 O22 Cs2 38.9(6) 3_554 . . 1_454 ?
O17 U2 O23 Cs1 161(8) . . . 1_455 ?
O3 U2 O23 Cs1 7.4(4) . . . 1_455 ?
O16 U2 O23 Cs1 -75.0(4) . . . 1_455 ?
O5 U2 O23 Cs1 -146.5(3) . . . 1_455 ?
O8 U2 O23 Cs1 79.6(4) . . . 1_455 ?
O1 U2 O23 Cs1 141.8(3) . . . 1_455 ?
W1 U2 O23 Cs1 110.5(3) . . . 1_455 ?
U4 U2 O23 Cs1 43.8(3) 1_556 . . 1_455 ?
Cs1 U2 O23 Cs1 166.90(8) . . . 1_455 ?
Cs2 U2 O23 Cs1 -107.1(3) . . . 1_455 ?
O17 U2 O23 Cs4 -34(8) . . . 1_455 ?
O3 U2 O23 Cs4 172.0(6) . . . 1_455 ?
O16 U2 O23 Cs4 89.6(7) . . . 1_455 ?
O5 U2 O23 Cs4 18.1(7) . . . 1_455 ?
O8 U2 O23 Cs4 -115.8(7) . . . 1_455 ?
O1 U2 O23 Cs4 -53.6(7) . . . 1_455 ?
W1 U2 O23 Cs4 -84.9(6) . . . 1_455 ?
U4 U2 O23 Cs4 -151.6(6) 1_556 . . 1_455 ?
Cs1 U2 O23 Cs4 164.6(9) 1_455 . . 1_455 ?
Cs1 U2 O23 Cs4 -28.5(9) . . . 1_455 ?
Cs2 U2 O23 Cs4 57.5(8) . . . 1_455 ?
U2 O17 Cs1 O3 -177.9(3) . . . 1_655 ?
Cs2 O17 Cs1 O3 75.2(3) . . . 1_655 ?
Cs4 O17 Cs1 O3 -11.4(3) 1_556 . . 1_655 ?
U2 O17 Cs1 O23 97.1(13) . . . 1_655 ?
Cs2 O17 Cs1 O23 -9.8(14) . . . 1_655 ?
Cs4 O17 Cs1 O23 -96.3(13) 1_556 . . 1_655 ?
U2 O17 Cs1 O22 177.6(5) . . . 1_656 ?
Cs2 O17 Cs1 O22 70.7(2) . . . 1_656 ?
Cs4 O17 Cs1 O22 -15.8(2) 1_556 . . 1_656 ?
U2 O17 Cs1 O1 -23.2(3) . . . . ?
Cs2 O17 Cs1 O1 -130.1(3) . . . . ?
Cs4 O17 Cs1 O1 143.3(3) 1_556 . . . ?
U2 O17 Cs1 O6 -17.3(5) . . . . ?
Cs2 O17 Cs1 O6 -124.2(2) . . . . ?
Cs4 O17 Cs1 O6 149.2(2) 1_556 . . . ?
U2 O17 Cs1 O12 -80.2(4) . . . . ?
Cs2 O17 Cs1 O12 172.9(3) . . . . ?
Cs4 O17 Cs1 O12 86.3(3) 1_556 . . . ?
U2 O17 Cs1 O5 40.9(4) . . . . ?
Cs2 O17 Cs1 O5 -65.9(3) . . . . ?
Cs4 O17 Cs1 O5 -152.5(4) 1_556 . . . ?
U2 O17 Cs1 O18 -121.6(4) . . . 1_656 ?
Cs2 O17 Cs1 O18 131.6(2) . . . 1_656 ?
Cs4 O17 Cs1 O18 45.0(3) 1_556 . . 1_656 ?
U2 O17 Cs1 O20 59.5(4) . . . . ?
Cs2 O17 Cs1 O20 -47.4(2) . . . . ?
Cs4 O17 Cs1 O20 -134.0(3) 1_556 . . . ?
U2 O17 Cs1 O11 136.7(4) . . . 1_656 ?
Cs2 O17 Cs1 O11 29.8(2) . . . 1_656 ?
Cs4 O17 Cs1 O11 -56.8(2) 1_556 . . 1_656 ?
U2 O17 Cs1 W1 -55.1(3) . . . . ?
Cs2 O17 Cs1 W1 -161.9(2) . . . . ?
Cs4 O17 Cs1 W1 111.5(2) 1_556 . . . ?
W1 O1 Cs1 O3 9.0(8) . . . 1_655 ?
U1 O1 Cs1 O3 -98.8(6) . . . 1_655 ?
U2 O1 Cs1 O3 114.9(5) . . . 1_655 ?
W1 O1 Cs1 O17 -90.4(4) . . . . ?
U1 O1 Cs1 O17 161.8(4) . . . . ?
U2 O1 Cs1 O17 15.5(2) . . . . ?
W1 O1 Cs1 O23 103.0(4) . . . 1_655 ?
U1 O1 Cs1 O23 -4.8(4) . . . 1_655 ?
U2 O1 Cs1 O23 -151.1(3) . . . 1_655 ?
W1 O1 Cs1 O22 -69.0(4) . . . 1_656 ?
U1 O1 Cs1 O22 -176.8(2) . . . 1_656 ?
U2 O1 Cs1 O22 36.9(3) . . . 1_656 ?
W1 O1 Cs1 O6 96.2(4) . . . . ?
U1 O1 Cs1 O6 -11.6(2) . . . . ?
U2 O1 Cs1 O6 -157.9(4) . . . . ?
W1 O1 Cs1 O12 -0.4(3) . . . . ?
U1 O1 Cs1 O12 -108.2(3) . . . . ?
U2 O1 Cs1 O12 105.5(3) . . . . ?
W1 O1 Cs1 O5 -151.9(4) . . . . ?
U1 O1 Cs1 O5 100.3(3) . . . . ?
U2 O1 Cs1 O5 -46.0(3) . . . . ?
W1 O1 Cs1 O18 9.0(4) . . . 1_656 ?
U1 O1 Cs1 O18 -98.8(3) . . . 1_656 ?
U2 O1 Cs1 O18 114.9(2) . . . 1_656 ?
W1 O1 Cs1 O20 173.6(3) . . . . ?
U1 O1 Cs1 O20 65.9(3) . . . . ?
U2 O1 Cs1 O20 -80.5(3) . . . . ?
W1 O1 Cs1 O11 -124.9(3) . . . 1_656 ?
U1 O1 Cs1 O11 127.3(3) . . . 1_656 ?
U2 O1 Cs1 O11 -19.0(5) . . . 1_656 ?
U1 O1 Cs1 W1 -107.8(4) . . . . ?
U2 O1 Cs1 W1 105.9(4) . . . . ?
U1 O6 Cs1 O3 171.4(3) . . . 1_655 ?
Cs3 O6 Cs1 O3 48.1(3) . . . 1_655 ?
Cs4 O6 Cs1 O3 -59.8(3) . . . 1_655 ?
U1 O6 Cs1 O17 10.4(5) . . . . ?
Cs3 O6 Cs1 O17 -112.9(2) . . . . ?
Cs4 O6 Cs1 O17 139.2(2) . . . . ?
U1 O6 Cs1 O23 -157.8(5) . . . 1_655 ?
Cs3 O6 Cs1 O23 78.8(2) . . . 1_655 ?
Cs4 O6 Cs1 O23 -29.1(2) . . . 1_655 ?
U1 O6 Cs1 O22 85.1(12) . . . 1_656 ?
Cs3 O6 Cs1 O22 -38.2(12) . . . 1_656 ?
Cs4 O6 Cs1 O22 -146.1(10) . . . 1_656 ?
U1 O6 Cs1 O1 16.5(3) . . . . ?
Cs3 O6 Cs1 O1 -106.8(3) . . . . ?
Cs4 O6 Cs1 O1 145.3(3) . . . . ?
U1 O6 Cs1 O12 71.5(4) . . . . ?
Cs3 O6 Cs1 O12 -51.9(2) . . . . ?
Cs4 O6 Cs1 O12 -159.7(3) . . . . ?
U1 O6 Cs1 O5 -30.3(4) . . . . ?
Cs3 O6 Cs1 O5 -153.7(2) . . . . ?
Cs4 O6 Cs1 O5 98.4(2) . . . . ?
U1 O6 Cs1 O18 120.7(4) . . . 1_656 ?
Cs3 O6 Cs1 O18 -2.6(2) . . . 1_656 ?
Cs4 O6 Cs1 O18 -110.5(2) . . . 1_656 ?
U1 O6 Cs1 O20 -76.6(4) . . . . ?
Cs3 O6 Cs1 O20 160.0(3) . . . . ?
Cs4 O6 Cs1 O20 52.1(2) . . . . ?
U1 O6 Cs1 O11 -118.1(4) . . . 1_656 ?
Cs3 O6 Cs1 O11 118.5(3) . . . 1_656 ?
Cs4 O6 Cs1 O11 10.7(5) . . . 1_656 ?
U1 O6 Cs1 W1 48.1(3) . . . . ?
Cs3 O6 Cs1 W1 -75.30(15) . . . . ?
Cs4 O6 Cs1 W1 176.8(3) . . . . ?
W1 O12 Cs1 O3 -176.0(4) . . . 1_655 ?
Cs3 O12 Cs1 O3 37.4(4) 4_556 . . 1_655 ?
Cs3 O12 Cs1 O3 -70.8(2) . . . 1_655 ?
W1 O12 Cs1 O17 64.1(4) . . . . ?
Cs3 O12 Cs1 O17 -82.5(4) 4_556 . . . ?
Cs3 O12 Cs1 O17 169.2(3) . . . . ?
W1 O12 Cs1 O23 -115.2(4) . . . 1_655 ?
Cs3 O12 Cs1 O23 98.2(4) 4_556 . . 1_655 ?
Cs3 O12 Cs1 O23 -10.1(4) . . . 1_655 ?
W1 O12 Cs1 O22 125.7(4) . . . 1_656 ?
Cs3 O12 Cs1 O22 -20.9(4) 4_556 . . 1_656 ?
Cs3 O12 Cs1 O22 -129.1(2) . . . 1_656 ?
W1 O12 Cs1 O1 0.5(3) . . . . ?
Cs3 O12 Cs1 O1 -146.1(4) 4_556 . . . ?
Cs3 O12 Cs1 O1 105.6(3) . . . . ?
W1 O12 Cs1 O6 -57.5(4) . . . . ?
Cs3 O12 Cs1 O6 155.9(4) 4_556 . . . ?
Cs3 O12 Cs1 O6 47.6(2) . . . . ?
W1 O12 Cs1 O5 22.7(4) . . . . ?
Cs3 O12 Cs1 O5 -123.9(3) 4_556 . . . ?
Cs3 O12 Cs1 O5 127.8(2) . . . . ?
W1 O12 Cs1 O18 -168.1(5) . . . 1_656 ?
Cs3 O12 Cs1 O18 45.3(3) 4_556 . . 1_656 ?
Cs3 O12 Cs1 O18 -63.0(2) . . . 1_656 ?
W1 O12 Cs1 O20 -8.2(6) . . . . ?
Cs3 O12 Cs1 O20 -154.8(3) 4_556 . . . ?
Cs3 O12 Cs1 O20 96.9(3) . . . . ?
W1 O12 Cs1 O11 130.7(4) . . . 1_656 ?
Cs3 O12 Cs1 O11 -15.9(5) 4_556 . . 1_656 ?
Cs3 O12 Cs1 O11 -124.2(3) . . . 1_656 ?
Cs3 O12 Cs1 W1 -146.6(6) 4_556 . . . ?
Cs3 O12 Cs1 W1 105.1(4) . . . . ?
W2 O5 Cs1 O3 86.6(5) . . . 1_655 ?
U2 O5 Cs1 O3 -117.2(4) . . . 1_655 ?
Cs2 O5 Cs1 O3 -20.9(5) . . . 1_655 ?
W2 O5 Cs1 O17 175.8(5) . . . . ?
U2 O5 Cs1 O17 -28.1(3) . . . . ?
Cs2 O5 Cs1 O17 68.3(3) . . . . ?
W2 O5 Cs1 O23 7.9(5) . . . 1_655 ?
U2 O5 Cs1 O23 164.1(3) . . . 1_655 ?
Cs2 O5 Cs1 O23 -99.6(3) . . . 1_655 ?
W2 O5 Cs1 O22 136.6(4) . . . 1_656 ?
U2 O5 Cs1 O22 -67.3(3) . . . 1_656 ?
Cs2 O5 Cs1 O22 29.0(2) . . . 1_656 ?
W2 O5 Cs1 O1 -106.4(5) . . . . ?
U2 O5 Cs1 O1 49.7(3) . . . . ?
Cs2 O5 Cs1 O1 146.0(3) . . . . ?
W2 O5 Cs1 O6 -56.3(4) . . . . ?
U2 O5 Cs1 O6 99.9(3) . . . . ?
Cs2 O5 Cs1 O6 -163.8(2) . . . . ?
W2 O5 Cs1 O12 -129.0(4) . . . . ?
U2 O5 Cs1 O12 27.1(3) . . . . ?
Cs2 O5 Cs1 O12 123.4(2) . . . . ?
W2 O5 Cs1 O18 -147.4(4) . . . 1_656 ?
U2 O5 Cs1 O18 8.8(6) . . . 1_656 ?
Cs2 O5 Cs1 O18 105.1(5) . . . 1_656 ?
W2 O5 Cs1 O20 22.0(3) . . . . ?
U2 O5 Cs1 O20 178.1(5) . . . . ?
Cs2 O5 Cs1 O20 -85.6(3) . . . . ?
W2 O5 Cs1 O11 89.6(4) . . . 1_656 ?
U2 O5 Cs1 O11 -114.3(3) . . . 1_656 ?
Cs2 O5 Cs1 O11 -17.9(2) . . . 1_656 ?
W2 O5 Cs1 W1 -119.5(4) . . . . ?
U2 O5 Cs1 W1 36.7(2) . . . . ?
Cs2 O5 Cs1 W1 132.98(16) . . . . ?
W2 O20 Cs1 O3 -170.7(3) . . . 1_655 ?
Cs2 O20 Cs1 O3 44.8(10) 3_554 . . 1_655 ?
W2 O20 Cs1 O17 -42.2(4) . . . . ?
Cs2 O20 Cs1 O17 173.3(9) 3_554 . . . ?
W2 O20 Cs1 O23 145.5(4) . . . 1_655 ?
Cs2 O20 Cs1 O23 0.9(9) 3_554 . . 1_655 ?
W2 O20 Cs1 O22 -104.3(4) . . . 1_656 ?
Cs2 O20 Cs1 O22 111.1(9) 3_554 . . 1_656 ?
W2 O20 Cs1 O1 15.4(4) . . . . ?
Cs2 O20 Cs1 O1 -129.1(9) 3_554 . . . ?
W2 O20 Cs1 O6 70.9(4) . . . . ?
Cs2 O20 Cs1 O6 -73.7(9) 3_554 . . . ?
W2 O20 Cs1 O12 22.3(6) . . . . ?
Cs2 O20 Cs1 O12 -122.2(9) 3_554 . . . ?
W2 O20 Cs1 O5 -22.5(3) . . . . ?
Cs2 O20 Cs1 O5 -167.0(11) 3_554 . . . ?
W2 O20 Cs1 O18 141.1(6) . . . 1_656 ?
Cs2 O20 Cs1 O18 -3.4(15) 3_554 . . 1_656 ?
W2 O20 Cs1 O11 -131.5(4) . . . 1_656 ?
Cs2 O20 Cs1 O11 84.0(9) 3_554 . . 1_656 ?
W2 O20 Cs1 W1 18.6(4) . . . . ?
Cs2 O20 Cs1 W1 -125.9(9) 3_554 . . . ?
O12 W1 Cs1 O3 5.1(5) . . . 1_655 ?
O2 W1 Cs1 O3 -2.4(7) 4_556 . . 1_655 ?
O8 W1 Cs1 O3 111.0(4) . . . 1_655 ?
O7 W1 Cs1 O3 -99.8(3) . . . 1_655 ?
O1 W1 Cs1 O3 -175.7(4) . . . 1_655 ?
U1 W1 Cs1 O3 -131.2(2) . . . 1_655 ?
U4 W1 Cs1 O3 -74.9(2) 4_556 . . 1_655 ?
U2 W1 Cs1 O3 136.3(2) . . . 1_655 ?
Cs3 W1 Cs1 O3 -54.4(2) . . . 1_655 ?
Cs3 W1 Cs1 O3 25.7(2) 4_556 . . 1_655 ?
Cs3 W1 Cs1 O3 153.1(2) 1_455 . . 1_655 ?
O12 W1 Cs1 O17 -105.8(5) . . . . ?
O2 W1 Cs1 O17 -113.3(7) 4_556 . . . ?
O8 W1 Cs1 O17 0.0(4) . . . . ?
O7 W1 Cs1 O17 149.3(3) . . . . ?
O1 W1 Cs1 O17 73.4(4) . . . . ?
U1 W1 Cs1 O17 117.9(2) . . . . ?
U4 W1 Cs1 O17 174.2(2) 4_556 . . . ?
U2 W1 Cs1 O17 25.4(2) . . . . ?
Cs3 W1 Cs1 O17 -165.3(2) . . . . ?
Cs3 W1 Cs1 O17 -85.2(2) 4_556 . . . ?
Cs3 W1 Cs1 O17 42.2(2) 1_455 . . . ?
O12 W1 Cs1 O23 81.5(5) . . . 1_655 ?
O2 W1 Cs1 O23 74.0(7) 4_556 . . 1_655 ?
O8 W1 Cs1 O23 -172.7(4) . . . 1_655 ?
O7 W1 Cs1 O23 -23.4(4) . . . 1_655 ?
O1 W1 Cs1 O23 -99.3(4) . . . 1_655 ?
U1 W1 Cs1 O23 -54.8(3) . . . 1_655 ?
U4 W1 Cs1 O23 1.5(3) 4_556 . . 1_655 ?
U2 W1 Cs1 O23 -147.3(3) . . . 1_655 ?
Cs3 W1 Cs1 O23 22.0(3) . . . 1_655 ?
Cs3 W1 Cs1 O23 102.1(3) 4_556 . . 1_655 ?
Cs3 W1 Cs1 O23 -130.5(3) 1_455 . . 1_655 ?
O12 W1 Cs1 O22 -57.6(4) . . . 1_656 ?
O2 W1 Cs1 O22 -65.2(7) 4_556 . . 1_656 ?
O8 W1 Cs1 O22 48.2(3) . . . 1_656 ?
O7 W1 Cs1 O22 -162.6(3) . . . 1_656 ?
O1 W1 Cs1 O22 121.5(4) . . . 1_656 ?
U1 W1 Cs1 O22 165.97(19) . . . 1_656 ?
U4 W1 Cs1 O22 -137.68(19) 4_556 . . 1_656 ?
U2 W1 Cs1 O22 73.52(19) . . . 1_656 ?
Cs3 W1 Cs1 O22 -117.16(19) . . . 1_656 ?
Cs3 W1 Cs1 O22 -37.10(19) 4_556 . . 1_656 ?
Cs3 W1 Cs1 O22 90.3(2) 1_455 . . 1_656 ?
O12 W1 Cs1 O1 -179.2(5) . . . . ?
O2 W1 Cs1 O1 173.3(8) 4_556 . . . ?
O8 W1 Cs1 O1 -73.4(4) . . . . ?
O7 W1 Cs1 O1 75.9(4) . . . . ?
U1 W1 Cs1 O1 44.4(3) . . . . ?
U4 W1 Cs1 O1 100.8(3) 4_556 . . . ?
U2 W1 Cs1 O1 -48.0(3) . . . . ?
Cs3 W1 Cs1 O1 121.3(3) . . . . ?
Cs3 W1 Cs1 O1 -158.6(3) 4_556 . . . ?
Cs3 W1 Cs1 O1 -31.2(3) 1_455 . . . ?
O12 W1 Cs1 O6 113.7(4) . . . . ?
O2 W1 Cs1 O6 106.1(7) 4_556 . . . ?
O8 W1 Cs1 O6 -140.5(4) . . . . ?
O7 W1 Cs1 O6 8.7(3) . . . . ?
O1 W1 Cs1 O6 -67.2(4) . . . . ?
U1 W1 Cs1 O6 -22.71(19) . . . . ?
U4 W1 Cs1 O6 33.6(2) 4_556 . . . ?
U2 W1 Cs1 O6 -115.2(2) . . . . ?
Cs3 W1 Cs1 O6 54.2(2) . . . . ?
Cs3 W1 Cs1 O6 134.2(2) 4_556 . . . ?
Cs3 W1 Cs1 O6 -98.4(2) 1_455 . . . ?
O2 W1 Cs1 O12 -7.5(8) 4_556 . . . ?
O8 W1 Cs1 O12 105.8(5) . . . . ?
O7 W1 Cs1 O12 -104.9(5) . . . . ?
O1 W1 Cs1 O12 179.2(5) . . . . ?
U1 W1 Cs1 O12 -136.4(4) . . . . ?
U4 W1 Cs1 O12 -80.0(4) 4_556 . . . ?
U2 W1 Cs1 O12 131.2(4) . . . . ?
Cs3 W1 Cs1 O12 -59.5(4) . . . . ?
Cs3 W1 Cs1 O12 20.5(4) 4_556 . . . ?
Cs3 W1 Cs1 O12 148.0(4) 1_455 . . . ?
O12 W1 Cs1 O5 -157.0(4) . . . . ?
O2 W1 Cs1 O5 -164.5(7) 4_556 . . . ?
O8 W1 Cs1 O5 -51.2(3) . . . . ?
O7 W1 Cs1 O5 98.1(3) . . . . ?
O1 W1 Cs1 O5 22.2(4) . . . . ?
U1 W1 Cs1 O5 66.65(17) . . . . ?
U4 W1 Cs1 O5 123.00(17) 4_556 . . . ?
U2 W1 Cs1 O5 -25.81(17) . . . . ?
Cs3 W1 Cs1 O5 143.52(17) . . . . ?
Cs3 W1 Cs1 O5 -136.42(17) 4_556 . . . ?
Cs3 W1 Cs1 O5 -9.00(18) 1_455 . . . ?
O12 W1 Cs1 O18 9.7(4) . . . 1_656 ?
O2 W1 Cs1 O18 2.2(7) 4_556 . . 1_656 ?
O8 W1 Cs1 O18 115.5(3) . . . 1_656 ?
O7 W1 Cs1 O18 -95.2(3) . . . 1_656 ?
O1 W1 Cs1 O18 -171.1(4) . . . 1_656 ?
U1 W1 Cs1 O18 -126.65(17) . . . 1_656 ?
U4 W1 Cs1 O18 -70.30(17) 4_556 . . 1_656 ?
U2 W1 Cs1 O18 140.90(16) . . . 1_656 ?
Cs3 W1 Cs1 O18 -49.78(17) . . . 1_656 ?
Cs3 W1 Cs1 O18 30.28(17) 4_556 . . 1_656 ?
Cs3 W1 Cs1 O18 157.71(17) 1_455 . . 1_656 ?
O12 W1 Cs1 O20 174.0(4) . . . . ?
O2 W1 Cs1 O20 166.4(7) 4_556 . . . ?
O8 W1 Cs1 O20 -80.2(3) . . . . ?
O7 W1 Cs1 O20 69.0(3) . . . . ?
O1 W1 Cs1 O20 -6.9(4) . . . . ?
U1 W1 Cs1 O20 37.58(18) . . . . ?
U4 W1 Cs1 O20 93.93(18) 4_556 . . . ?
U2 W1 Cs1 O20 -54.87(18) . . . . ?
Cs3 W1 Cs1 O20 114.45(18) . . . . ?
Cs3 W1 Cs1 O20 -165.49(18) 4_556 . . . ?
Cs3 W1 Cs1 O20 -38.06(19) 1_455 . . . ?
O12 W1 Cs1 O11 -81.8(5) . . . 1_656 ?
O2 W1 Cs1 O11 -89.4(8) 4_556 . . 1_656 ?
O8 W1 Cs1 O11 24.0(4) . . . 1_656 ?
O7 W1 Cs1 O11 173.2(4) . . . 1_656 ?
O1 W1 Cs1 O11 97.3(4) . . . 1_656 ?
U1 W1 Cs1 O11 141.8(3) . . . 1_656 ?
U4 W1 Cs1 O11 -161.9(3) 4_556 . . 1_656 ?
U2 W1 Cs1 O11 49.3(3) . . . 1_656 ?
Cs3 W1 Cs1 O11 -141.3(3) . . . 1_656 ?
Cs3 W1 Cs1 O11 -61.3(3) 4_556 . . 1_656 ?
Cs3 W1 Cs1 O11 66.1(3) 1_455 . . 1_656 ?
W3 O21 Cs2 O21 -124.8(5) . . . 3 ?
Cs2 O21 Cs2 O21 0.0 3 . . 3 ?
Cs4 O21 Cs2 O21 102.6(3) 3_554 . . 3 ?
W3 O21 Cs2 O9 160.9(5) . . . 3_554 ?
Cs2 O21 Cs2 O9 -74.3(3) 3 . . 3_554 ?
Cs4 O21 Cs2 O9 28.4(2) 3_554 . . 3_554 ?
W3 O21 Cs2 O20 100.1(5) . . . 3_554 ?
Cs2 O21 Cs2 O20 -135.1(3) 3 . . 3_554 ?
Cs4 O21 Cs2 O20 -32.5(3) 3_554 . . 3_554 ?
W3 O21 Cs2 O5 14.4(5) . . . . ?
Cs2 O21 Cs2 O5 139.3(2) 3 . . . ?
Cs4 O21 Cs2 O5 -118.1(3) 3_554 . . . ?
W3 O21 Cs2 O11 -157.4(4) . . . 1_656 ?
Cs2 O21 Cs2 O11 -32.6(7) 3 . . 1_656 ?
Cs4 O21 Cs2 O11 70.1(7) 3_554 . . 1_656 ?
W3 O21 Cs2 O17 -35.3(5) . . . . ?
Cs2 O21 Cs2 O17 89.6(3) 3 . . . ?
Cs4 O21 Cs2 O17 -167.8(3) 3_554 . . . ?
W3 O21 Cs2 O4 147.6(4) . . . 3_554 ?
Cs2 O21 Cs2 O4 -87.6(3) 3 . . 3_554 ?
Cs4 O21 Cs2 O4 15.1(4) 3_554 . . 3_554 ?
W3 O21 Cs2 O16 -3.8(3) . . . . ?
Cs2 O21 Cs2 O16 121.1(4) 3 . . . ?
Cs4 O21 Cs2 O16 -136.3(4) 3_554 . . . ?
W3 O21 Cs2 O22 -83.7(5) . . . 1_656 ?
Cs2 O21 Cs2 O22 41.1(4) 3 . . 1_656 ?
Cs4 O21 Cs2 O22 143.8(2) 3_554 . . 1_656 ?
Cs2 O21 Cs2 W3 124.8(5) 3 . . . ?
Cs4 O21 Cs2 W3 -132.5(6) 3_554 . . . ?
W3 O21 Cs2 W2 117.2(4) . . . 3_554 ?
Cs2 O21 Cs2 W2 -117.99(18) 3 . . 3_554 ?
Cs4 O21 Cs2 W2 -15.3(3) 3_554 . . 3_554 ?
W2 O5 Cs2 O21 105.1(4) . . . . ?
U2 O5 Cs2 O21 -64.8(3) . . . . ?
Cs1 O5 Cs2 O21 -154.7(2) . . . . ?
W2 O5 Cs2 O21 -167.5(4) . . . 3 ?
U2 O5 Cs2 O21 22.6(5) . . . 3 ?
Cs1 O5 Cs2 O21 -67.3(4) . . . 3 ?
W2 O5 Cs2 O9 39.4(7) . . . 3_554 ?
U2 O5 Cs2 O9 -130.5(4) . . . 3_554 ?
Cs1 O5 Cs2 O9 139.5(4) . . . 3_554 ?
W2 O5 Cs2 O20 10.4(4) . . . 3_554 ?
U2 O5 Cs2 O20 -159.4(3) . . . 3_554 ?
Cs1 O5 Cs2 O20 110.6(2) . . . 3_554 ?
W2 O5 Cs2 O11 -78.2(4) . . . 1_656 ?
U2 O5 Cs2 O11 111.9(3) . . . 1_656 ?
Cs1 O5 Cs2 O11 21.9(2) . . . 1_656 ?
W2 O5 Cs2 O17 -162.9(6) . . . . ?
U2 O5 Cs2 O17 27.3(3) . . . . ?
Cs1 O5 Cs2 O17 -62.7(3) . . . . ?
W2 O5 Cs2 O4 -28.2(5) . . . 3_554 ?
U2 O5 Cs2 O4 161.9(2) . . . 3_554 ?
Cs1 O5 Cs2 O4 71.9(3) . . . 3_554 ?
W2 O5 Cs2 O16 123.6(5) . . . . ?
U2 O5 Cs2 O16 -46.3(3) . . . . ?
Cs1 O5 Cs2 O16 -136.2(3) . . . . ?
W2 O5 Cs2 O22 -123.5(4) . . . 1_656 ?
U2 O5 Cs2 O22 66.6(3) . . . 1_656 ?
Cs1 O5 Cs2 O22 -23.4(2) . . . 1_656 ?
W2 O5 Cs2 W3 111.2(4) . . . . ?
U2 O5 Cs2 W3 -58.7(2) . . . . ?
Cs1 O5 Cs2 W3 -148.67(17) . . . . ?
W2 O5 Cs2 W2 -8.6(4) . . . 3_554 ?
U2 O5 Cs2 W2 -178.5(2) . . . 3_554 ?
Cs1 O5 Cs2 W2 91.54(13) . . . 3_554 ?
U2 O17 Cs2 O21 54.5(4) . . . . ?
Cs1 O17 Cs2 O21 164.2(3) . . . . ?
Cs4 O17 Cs2 O21 -87.2(2) 1_556 . . . ?
U2 O17 Cs2 O21 138.4(4) . . . 3 ?
Cs1 O17 Cs2 O21 -111.9(3) . . . 3 ?
Cs4 O17 Cs2 O21 -3.3(2) 1_556 . . 3 ?
U2 O17 Cs2 O9 103.2(8) . . . 3_554 ?
Cs1 O17 Cs2 O9 -147.1(7) . . . 3_554 ?
Cs4 O17 Cs2 O9 -38.5(8) 1_556 . . 3_554 ?
U2 O17 Cs2 O20 -47.9(6) . . . 3_554 ?
Cs1 O17 Cs2 O20 61.7(4) . . . 3_554 ?
Cs4 O17 Cs2 O20 170.4(3) 1_556 . . 3_554 ?
U2 O17 Cs2 O5 -38.6(4) . . . . ?
Cs1 O17 Cs2 O5 71.0(3) . . . . ?
Cs4 O17 Cs2 O5 179.7(4) 1_556 . . . ?
U2 O17 Cs2 O11 -145.2(4) . . . 1_656 ?
Cs1 O17 Cs2 O11 -35.6(2) . . . 1_656 ?
Cs4 O17 Cs2 O11 73.1(2) 1_556 . . 1_656 ?
U2 O17 Cs2 O4 -129.5(4) . . . 3_554 ?
Cs1 O17 Cs2 O4 -19.8(5) . . . 3_554 ?
Cs4 O17 Cs2 O4 88.8(4) 1_556 . . 3_554 ?
U2 O17 Cs2 O16 24.9(3) . . . . ?
Cs1 O17 Cs2 O16 134.5(3) . . . . ?
Cs4 O17 Cs2 O16 -116.9(3) 1_556 . . . ?
U2 O17 Cs2 O22 -168.7(5) . . . 1_656 ?
Cs1 O17 Cs2 O22 -59.1(2) . . . 1_656 ?
Cs4 O17 Cs2 O22 49.5(2) 1_556 . . 1_656 ?
U2 O17 Cs2 W3 40.6(3) . . . . ?
Cs1 O17 Cs2 W3 150.2(2) . . . . ?
Cs4 O17 Cs2 W3 -101.11(15) 1_556 . . . ?
U2 O17 Cs2 W2 -82.1(4) . . . 3_554 ?
Cs1 O17 Cs2 W2 27.6(4) . . . 3_554 ?
Cs4 O17 Cs2 W2 136.21(16) 1_556 . . 3_554 ?
W3 O16 Cs2 O21 3.5(3) . . . . ?
U2 O16 Cs2 O21 -157.9(4) . . . . ?
W3 O16 Cs2 O21 67.7(4) . . . 3 ?
U2 O16 Cs2 O21 -93.7(3) . . . 3 ?
W3 O16 Cs2 O9 -13.3(5) . . . 3_554 ?
U2 O16 Cs2 O9 -174.7(3) . . . 3_554 ?
W3 O16 Cs2 O20 -81.5(4) . . . 3_554 ?
U2 O16 Cs2 O20 117.1(3) . . . 3_554 ?
W3 O16 Cs2 O5 -152.2(5) . . . . ?
U2 O16 Cs2 O5 46.5(3) . . . . ?
W3 O16 Cs2 O11 163.2(3) . . . 1_656 ?
U2 O16 Cs2 O11 1.8(6) . . . 1_656 ?
W3 O16 Cs2 O17 143.4(5) . . . . ?
U2 O16 Cs2 O17 -18.0(2) . . . . ?
W3 O16 Cs2 O4 -76.0(7) . . . 3_554 ?
U2 O16 Cs2 O4 122.6(5) . . . 3_554 ?
W3 O16 Cs2 O22 131.5(3) . . . 1_656 ?
U2 O16 Cs2 O22 -29.9(3) . . . 1_656 ?
U2 O16 Cs2 W3 -161.4(6) . . . . ?
W3 O16 Cs2 W2 -85.3(4) . . . 3_554 ?
U2 O16 Cs2 W2 113.3(2) . . . 3_554 ?
O11 W3 Cs2 O21 -97.2(6) 1_556 . . . ?
O16 W3 Cs2 O21 -173.4(6) . . . . ?
O10 W3 Cs2 O21 105.8(5) 3_454 . . . ?
O4 W3 Cs2 O21 18.1(6) 3_454 . . . ?
W2 W3 Cs2 O21 69.1(5) 3_454 . . . ?
Cs2 W3 Cs2 O21 -94.1(5) 1_455 . . . ?
Cs2 W3 Cs2 O21 -40.2(5) 3 . . . ?
O21 W3 Cs2 O21 55.4(6) . . . 3 ?
O11 W3 Cs2 O21 -41.8(4) 1_556 . . 3 ?
O16 W3 Cs2 O21 -118.0(4) . . . 3 ?
O10 W3 Cs2 O21 161.3(3) 3_454 . . 3 ?
O4 W3 Cs2 O21 73.5(4) 3_454 . . 3 ?
W2 W3 Cs2 O21 124.50(18) 3_454 . . 3 ?
Cs2 W3 Cs2 O21 -38.7(2) 1_455 . . 3 ?
Cs2 W3 Cs2 O21 15.18(17) 3 . . 3 ?
O21 W3 Cs2 O9 -18.1(5) . . . 3_554 ?
O11 W3 Cs2 O9 -115.3(4) 1_556 . . 3_554 ?
O16 W3 Cs2 O9 168.4(4) . . . 3_554 ?
O10 W3 Cs2 O9 87.7(3) 3_454 . . 3_554 ?
O4 W3 Cs2 O9 0.0(4) 3_454 . . 3_554 ?
W2 W3 Cs2 O9 50.94(18) 3_454 . . 3_554 ?
Cs2 W3 Cs2 O9 -112.2(2) 1_455 . . 3_554 ?
Cs2 W3 Cs2 O9 -58.38(18) 3 . . 3_554 ?
O21 W3 Cs2 O20 -82.8(5) . . . 3_554 ?
O11 W3 Cs2 O20 180.0(4) 1_556 . . 3_554 ?
O16 W3 Cs2 O20 103.7(4) . . . 3_554 ?
O10 W3 Cs2 O20 23.0(4) 3_454 . . 3_554 ?
O4 W3 Cs2 O20 -64.7(4) 3_454 . . 3_554 ?
W2 W3 Cs2 O20 -13.8(2) 3_454 . . 3_554 ?
Cs2 W3 Cs2 O20 -176.9(2) 1_455 . . 3_554 ?
Cs2 W3 Cs2 O20 -123.1(2) 3 . . 3_554 ?
O21 W3 Cs2 O5 -164.9(5) . . . . ?
O11 W3 Cs2 O5 97.9(4) 1_556 . . . ?
O16 W3 Cs2 O5 21.6(4) . . . . ?
O10 W3 Cs2 O5 -59.1(3) 3_454 . . . ?
O4 W3 Cs2 O5 -146.8(4) 3_454 . . . ?
W2 W3 Cs2 O5 -95.87(17) 3_454 . . . ?
Cs2 W3 Cs2 O5 101.0(2) 1_455 . . . ?
Cs2 W3 Cs2 O5 154.81(17) 3 . . . ?
O21 W3 Cs2 O11 103.6(11) . . . 1_656 ?
O11 W3 Cs2 O11 6.4(7) 1_556 . . 1_656 ?
O16 W3 Cs2 O11 -69.8(11) . . . 1_656 ?
O10 W3 Cs2 O11 -150.5(11) 3_454 . . 1_656 ?
O4 W3 Cs2 O11 121.8(11) 3_454 . . 1_656 ?
W2 W3 Cs2 O11 172.7(10) 3_454 . . 1_656 ?
Cs2 W3 Cs2 O11 9.5(11) 1_455 . . 1_656 ?
Cs2 W3 Cs2 O11 63.4(10) 3 . . 1_656 ?
O21 W3 Cs2 O17 143.6(5) . . . . ?
O11 W3 Cs2 O17 46.4(4) 1_556 . . . ?
O16 W3 Cs2 O17 -29.8(4) . . . . ?
O10 W3 Cs2 O17 -110.5(3) 3_454 . . . ?
O4 W3 Cs2 O17 161.8(4) 3_454 . . . ?
W2 W3 Cs2 O17 -147.28(17) 3_454 . . . ?
Cs2 W3 Cs2 O17 49.5(2) 1_455 . . . ?
Cs2 W3 Cs2 O17 103.39(17) 3 . . . ?
O21 W3 Cs2 O4 -45.8(5) . . . 3_554 ?
O11 W3 Cs2 O4 -143.0(4) 1_556 . . 3_554 ?
O16 W3 Cs2 O4 140.7(5) . . . 3_554 ?
O10 W3 Cs2 O4 60.0(4) 3_454 . . 3_554 ?
O4 W3 Cs2 O4 -27.72(18) 3_454 . . 3_554 ?
W2 W3 Cs2 O4 23.2(3) 3_454 . . 3_554 ?
Cs2 W3 Cs2 O4 -139.9(3) 1_455 . . 3_554 ?
Cs2 W3 Cs2 O4 -86.1(3) 3 . . 3_554 ?
O21 W3 Cs2 O16 173.4(6) . . . . ?
O11 W3 Cs2 O16 76.2(5) 1_556 . . . ?
O10 W3 Cs2 O16 -80.7(5) 3_454 . . . ?
O4 W3 Cs2 O16 -168.5(5) 3_454 . . . ?
W2 W3 Cs2 O16 -117.5(4) 3_454 . . . ?
Cs2 W3 Cs2 O16 79.3(4) 1_455 . . . ?
Cs2 W3 Cs2 O16 133.2(4) 3 . . . ?
O21 W3 Cs2 O22 114.2(5) . . . 1_656 ?
O11 W3 Cs2 O22 17.0(4) 1_556 . . 1_656 ?
O16 W3 Cs2 O22 -59.2(4) . . . 1_656 ?
O10 W3 Cs2 O22 -139.9(3) 3_454 . . 1_656 ?
O4 W3 Cs2 O22 132.3(4) 3_454 . . 1_656 ?
W2 W3 Cs2 O22 -176.70(18) 3_454 . . 1_656 ?
Cs2 W3 Cs2 O22 20.1(2) 1_455 . . 1_656 ?
Cs2 W3 Cs2 O22 73.98(19) 3 . . 1_656 ?
O21 W3 Cs2 W2 -74.1(5) . . . 3_554 ?
O11 W3 Cs2 W2 -171.3(3) 1_556 . . 3_554 ?
O16 W3 Cs2 W2 112.4(4) . . . 3_554 ?
O10 W3 Cs2 W2 31.7(3) 3_454 . . 3_554 ?
O4 W3 Cs2 W2 -56.0(4) 3_454 . . 3_554 ?
W2 W3 Cs2 W2 -5.06(4) 3_454 . . 3_554 ?
Cs2 W3 Cs2 W2 -168.24(9) 1_455 . . 3_554 ?
Cs2 W3 Cs2 W2 -114.38(4) 3 . . 3_554 ?
U1 O6 Cs3 O12 66.5(5) . . . 4 ?
Cs1 O6 Cs3 O12 -178.0(3) . . . 4 ?
Cs4 O6 Cs3 O12 -81.9(3) . . . 4 ?
U1 O6 Cs3 O13 -77.3(13) . . . 4_656 ?
Cs1 O6 Cs3 O13 38.2(12) . . . 4_656 ?
Cs4 O6 Cs3 O13 134.3(11) . . . 4_656 ?
U1 O6 Cs3 O15 -1.5(5) . . . 4_556 ?
Cs1 O6 Cs3 O15 114.0(2) . . . 4_556 ?
Cs4 O6 Cs3 O15 -149.9(3) . . . 4_556 ?
U1 O6 Cs3 O18 -112.9(5) . . . 1_656 ?
Cs1 O6 Cs3 O18 2.7(2) . . . 1_656 ?
Cs4 O6 Cs3 O18 98.7(3) . . . 1_656 ?
U1 O6 Cs3 O18 110.2(5) . . . 4_656 ?
Cs1 O6 Cs3 O18 -134.3(2) . . . 4_656 ?
Cs4 O6 Cs3 O18 -38.2(3) . . . 4_656 ?
U1 O6 Cs3 O12 -66.7(5) . . . . ?
Cs1 O6 Cs3 O12 48.9(2) . . . . ?
Cs4 O6 Cs3 O12 144.9(3) . . . . ?
U1 O6 Cs3 O2 169.3(4) . . . 4_656 ?
Cs1 O6 Cs3 O2 -75.2(3) . . . 4_656 ?
Cs4 O6 Cs3 O2 20.9(4) . . . 4_656 ?
U1 O6 Cs3 O7 -15.2(4) . . . . ?
Cs1 O6 Cs3 O7 100.3(3) . . . . ?
Cs4 O6 Cs3 O7 -163.6(4) . . . . ?
U1 O6 Cs3 O8 -162.1(4) . . . 1_655 ?
Cs1 O6 Cs3 O8 -46.6(2) . . . 1_655 ?
Cs4 O6 Cs3 O8 49.5(3) . . . 1_655 ?
U1 O6 Cs3 W1 -45.7(4) . . . . ?
Cs1 O6 Cs3 W1 69.81(15) . . . . ?
Cs4 O6 Cs3 W1 165.9(3) . . . . ?
U1 O6 Cs3 U1 -157.8(2) . . . 4_656 ?
Cs1 O6 Cs3 U1 -42.3(6) . . . 4_656 ?
Cs4 O6 Cs3 U1 53.8(6) . . . 4_656 ?
W1 O12 Cs3 O12 -7.4(4) . . . 4 ?
Cs3 O12 Cs3 O12 136.9(4) 4_556 . . 4 ?
Cs1 O12 Cs3 O12 -108.01(18) . . . 4 ?
W1 O12 Cs3 O13 -129.6(4) . . . 4_656 ?
Cs3 O12 Cs3 O13 14.7(3) 4_556 . . 4_656 ?
Cs1 O12 Cs3 O13 129.7(2) . . . 4_656 ?
W1 O12 Cs3 O6 52.8(4) . . . . ?
Cs3 O12 Cs3 O6 -163.0(4) 4_556 . . . ?
Cs1 O12 Cs3 O6 -47.9(2) . . . . ?
W1 O12 Cs3 O15 -54.2(4) . . . 4_556 ?
Cs3 O12 Cs3 O15 90.1(3) 4_556 . . 4_556 ?
Cs1 O12 Cs3 O15 -154.9(3) . . . 4_556 ?
W1 O12 Cs3 O18 167.2(5) . . . 1_656 ?
Cs3 O12 Cs3 O18 -48.6(3) 4_556 . . 1_656 ?
Cs1 O12 Cs3 O18 66.5(3) . . . 1_656 ?
W1 O12 Cs3 O18 -95(3) . . . 4_656 ?
Cs3 O12 Cs3 O18 49(3) 4_556 . . 4_656 ?
Cs1 O12 Cs3 O18 164(3) . . . 4_656 ?
W1 O12 Cs3 O2 -178.6(3) . . . 4_656 ?
Cs3 O12 Cs3 O2 -34.3(4) 4_556 . . 4_656 ?
Cs1 O12 Cs3 O2 80.8(3) . . . 4_656 ?
W1 O12 Cs3 O7 -1.6(3) . . . . ?
Cs3 O12 Cs3 O7 142.7(4) 4_556 . . . ?
Cs1 O12 Cs3 O7 -102.2(3) . . . . ?
W1 O12 Cs3 O8 148.1(4) . . . 1_655 ?
Cs3 O12 Cs3 O8 -67.6(3) 4_556 . . 1_655 ?
Cs1 O12 Cs3 O8 47.5(2) . . . 1_655 ?
Cs3 O12 Cs3 W1 144.3(6) 4_556 . . . ?
Cs1 O12 Cs3 W1 -100.6(4) . . . . ?
W1 O12 Cs3 U1 -146.3(3) . . . 4_656 ?
Cs3 O12 Cs3 U1 -2.0(3) 4_556 . . 4_656 ?
Cs1 O12 Cs3 U1 113.11(15) . . . 4_656 ?
W1 O7 Cs3 O12 176.5(3) . . . 4 ?
U1 O7 Cs3 O12 -76.1(3) . . . 4 ?
U4 O7 Cs3 O12 68.0(3) 4_556 . . 4 ?
W1 O7 Cs3 O13 68.9(4) . . . 4_656 ?
U1 O7 Cs3 O13 176.3(3) . . . 4_656 ?
U4 O7 Cs3 O13 -39.6(4) 4_556 . . 4_656 ?
W1 O7 Cs3 O6 -97.5(4) . . . . ?
U1 O7 Cs3 O6 9.9(2) . . . . ?
U4 O7 Cs3 O6 154.0(4) 4_556 . . . ?
W1 O7 Cs3 O15 100.5(4) . . . 4_556 ?
U1 O7 Cs3 O15 -152.1(4) . . . 4_556 ?
U4 O7 Cs3 O15 -7.9(2) 4_556 . . 4_556 ?
W1 O7 Cs3 O18 -7.6(3) . . . 1_656 ?
U1 O7 Cs3 O18 99.8(3) . . . 1_656 ?
U4 O7 Cs3 O18 -116.0(3) 4_556 . . 1_656 ?
W1 O7 Cs3 O18 174.2(3) . . . 4_656 ?
U1 O7 Cs3 O18 -78.4(3) . . . 4_656 ?
U4 O7 Cs3 O18 65.7(4) 4_556 . . 4_656 ?
W1 O7 Cs3 O12 1.4(3) . . . . ?
U1 O7 Cs3 O12 108.8(3) . . . . ?
U4 O7 Cs3 O12 -107.1(4) 4_556 . . . ?
W1 O7 Cs3 O2 34(3) . . . 4_656 ?
U1 O7 Cs3 O2 141(2) . . . 4_656 ?
U4 O7 Cs3 O2 -75(2) 4_556 . . 4_656 ?
W1 O7 Cs3 O8 -45.4(4) . . . 1_655 ?
U1 O7 Cs3 O8 62.0(4) . . . 1_655 ?
U4 O7 Cs3 O8 -153.9(2) 4_556 . . 1_655 ?
U1 O7 Cs3 W1 107.4(4) . . . . ?
U4 O7 Cs3 W1 -108.5(4) 4_556 . . . ?
W1 O7 Cs3 U1 64.7(4) . . . 4_656 ?
U1 O7 Cs3 U1 172.06(7) . . . 4_656 ?
U4 O7 Cs3 U1 -43.8(4) 4_556 . . 4_656 ?
O12 W1 Cs3 O12 173.8(3) . . . 4 ?
O2 W1 Cs3 O12 73.2(3) 4_556 . . 4 ?
O8 W1 Cs3 O12 -166.3(7) . . . 4 ?
O7 W1 Cs3 O12 -3.5(3) . . . 4 ?
O1 W1 Cs3 O12 -82.7(3) . . . 4 ?
U1 W1 Cs3 O12 -47.98(18) . . . 4 ?
U4 W1 Cs3 O12 39.80(18) 4_556 . . 4 ?
U2 W1 Cs3 O12 -111.66(18) . . . 4 ?
Cs1 W1 Cs3 O12 -124.20(18) . . . 4 ?
Cs3 W1 Cs3 O12 150.51(18) 4_556 . . 4 ?
Cs3 W1 Cs3 O12 33.68(19) 1_455 . . 4 ?
O12 W1 Cs3 O13 54.6(4) . . . 4_656 ?
O2 W1 Cs3 O13 -46.0(4) 4_556 . . 4_656 ?
O8 W1 Cs3 O13 74.6(7) . . . 4_656 ?
O7 W1 Cs3 O13 -122.6(4) . . . 4_656 ?
O1 W1 Cs3 O13 158.1(3) . . . 4_656 ?
U1 W1 Cs3 O13 -167.1(2) . . . 4_656 ?
U4 W1 Cs3 O13 -79.4(2) 4_556 . . 4_656 ?
U2 W1 Cs3 O13 129.2(2) . . . 4_656 ?
Cs1 W1 Cs3 O13 116.6(2) . . . 4_656 ?
Cs3 W1 Cs3 O13 31.3(2) 4_556 . . 4_656 ?
Cs3 W1 Cs3 O13 -85.5(2) 1_455 . . 4_656 ?
O12 W1 Cs3 O6 -118.2(4) . . . . ?
O2 W1 Cs3 O6 141.2(4) 4_556 . . . ?
O8 W1 Cs3 O6 -98.2(7) . . . . ?
O7 W1 Cs3 O6 64.6(4) . . . . ?
O1 W1 Cs3 O6 -14.7(3) . . . . ?
U1 W1 Cs3 O6 20.1(2) . . . . ?
U4 W1 Cs3 O6 107.8(2) 4_556 . . . ?
U2 W1 Cs3 O6 -43.6(2) . . . . ?
Cs1 W1 Cs3 O6 -56.2(2) . . . . ?
Cs3 W1 Cs3 O6 -141.4(2) 4_556 . . . ?
Cs3 W1 Cs3 O6 101.7(2) 1_455 . . . ?
O12 W1 Cs3 O15 116.2(4) . . . 4_556 ?
O2 W1 Cs3 O15 15.6(4) 4_556 . . 4_556 ?
O8 W1 Cs3 O15 136.1(7) . . . 4_556 ?
O7 W1 Cs3 O15 -61.1(4) . . . 4_556 ?
O1 W1 Cs3 O15 -140.3(3) . . . 4_556 ?
U1 W1 Cs3 O15 -105.6(2) . . . 4_556 ?
U4 W1 Cs3 O15 -17.8(2) 4_556 . . 4_556 ?
U2 W1 Cs3 O15 -169.3(2) . . . 4_556 ?
Cs1 W1 Cs3 O15 178.2(2) . . . 4_556 ?
Cs3 W1 Cs3 O15 92.9(2) 4_556 . . 4_556 ?
Cs3 W1 Cs3 O15 -23.9(2) 1_455 . . 4_556 ?
O12 W1 Cs3 O18 -10.5(4) . . . 1_656 ?
O2 W1 Cs3 O18 -111.1(3) 4_556 . . 1_656 ?
O8 W1 Cs3 O18 9.4(7) . . . 1_656 ?
O7 W1 Cs3 O18 172.3(3) . . . 1_656 ?
O1 W1 Cs3 O18 93.0(3) . . . 1_656 ?
U1 W1 Cs3 O18 127.75(16) . . . 1_656 ?
U4 W1 Cs3 O18 -144.46(16) 4_556 . . 1_656 ?
U2 W1 Cs3 O18 64.07(16) . . . 1_656 ?
Cs1 W1 Cs3 O18 51.54(16) . . . 1_656 ?
Cs3 W1 Cs3 O18 -33.75(16) 4_556 . . 1_656 ?
Cs3 W1 Cs3 O18 -150.58(16) 1_455 . . 1_656 ?
O12 W1 Cs3 O18 165.9(6) . . . 4_656 ?
O2 W1 Cs3 O18 65.3(5) 4_556 . . 4_656 ?
O8 W1 Cs3 O18 -174.2(8) . . . 4_656 ?
O7 W1 Cs3 O18 -11.4(5) . . . 4_656 ?
O1 W1 Cs3 O18 -90.6(5) . . . 4_656 ?
U1 W1 Cs3 O18 -55.9(4) . . . 4_656 ?
U4 W1 Cs3 O18 31.9(4) 4_556 . . 4_656 ?
U2 W1 Cs3 O18 -119.6(4) . . . 4_656 ?
Cs1 W1 Cs3 O18 -132.1(4) . . . 4_656 ?
Cs3 W1 Cs3 O18 142.6(4) 4_556 . . 4_656 ?
Cs3 W1 Cs3 O18 25.8(4) 1_455 . . 4_656 ?
O2 W1 Cs3 O12 -100.6(5) 4_556 . . . ?
O8 W1 Cs3 O12 19.9(8) . . . . ?
O7 W1 Cs3 O12 -177.3(5) . . . . ?
O1 W1 Cs3 O12 103.5(5) . . . . ?
U1 W1 Cs3 O12 138.2(4) . . . . ?
U4 W1 Cs3 O12 -134.0(4) 4_556 . . . ?
U2 W1 Cs3 O12 74.6(4) . . . . ?
Cs1 W1 Cs3 O12 62.0(4) . . . . ?
Cs3 W1 Cs3 O12 -23.3(4) 4_556 . . . ?
Cs3 W1 Cs3 O12 -140.1(4) 1_455 . . . ?
O12 W1 Cs3 O2 2.3(5) . . . 4_656 ?
O2 W1 Cs3 O2 -98.3(4) 4_556 . . 4_656 ?
O8 W1 Cs3 O2 22.2(8) . . . 4_656 ?
O7 W1 Cs3 O2 -175.0(4) . . . 4_656 ?
O1 W1 Cs3 O2 105.8(4) . . . 4_656 ?
U1 W1 Cs3 O2 140.5(3) . . . 4_656 ?
U4 W1 Cs3 O2 -131.7(3) 4_556 . . 4_656 ?
U2 W1 Cs3 O2 76.8(3) . . . 4_656 ?
Cs1 W1 Cs3 O2 64.3(3) . . . 4_656 ?
Cs3 W1 Cs3 O2 -21.0(3) 4_556 . . 4_656 ?
Cs3 W1 Cs3 O2 -137.8(3) 1_455 . . 4_656 ?
O12 W1 Cs3 O7 177.3(5) . . . . ?
O2 W1 Cs3 O7 76.7(4) 4_556 . . . ?
O8 W1 Cs3 O7 -162.8(8) . . . . ?
O1 W1 Cs3 O7 -79.2(4) . . . . ?
U1 W1 Cs3 O7 -44.5(3) . . . . ?
U4 W1 Cs3 O7 43.3(3) 4_556 . . . ?
U2 W1 Cs3 O7 -108.2(3) . . . . ?
Cs1 W1 Cs3 O7 -120.7(3) . . . . ?
Cs3 W1 Cs3 O7 154.0(3) 4_556 . . . ?
Cs3 W1 Cs3 O7 37.2(3) 1_455 . . . ?
O12 W1 Cs3 O8 -35.8(4) . . . 1_655 ?
O2 W1 Cs3 O8 -136.4(3) 4_556 . . 1_655 ?
O8 W1 Cs3 O8 -15.9(6) . . . 1_655 ?
O7 W1 Cs3 O8 146.9(3) . . . 1_655 ?
O1 W1 Cs3 O8 67.7(3) . . . 1_655 ?
U1 W1 Cs3 O8 102.44(15) . . . 1_655 ?
U4 W1 Cs3 O8 -169.77(15) 4_556 . . 1_655 ?
U2 W1 Cs3 O8 38.76(16) . . . 1_655 ?
Cs1 W1 Cs3 O8 26.23(15) . . . 1_655 ?
Cs3 W1 Cs3 O8 -59.07(15) 4_556 . . 1_655 ?
Cs3 W1 Cs3 O8 -175.89(15) 1_455 . . 1_655 ?
O12 W1 Cs3 U1 40.9(4) . . . 4_656 ?
O2 W1 Cs3 U1 -59.6(3) 4_556 . . 4_656 ?
O8 W1 Cs3 U1 60.9(7) . . . 4_656 ?
O7 W1 Cs3 U1 -136.3(3) . . . 4_656 ?
O1 W1 Cs3 U1 144.5(3) . . . 4_656 ?
U1 W1 Cs3 U1 179.18(3) . . . 4_656 ?
U4 W1 Cs3 U1 -93.03(3) 4_556 . . 4_656 ?
U2 W1 Cs3 U1 115.50(3) . . . 4_656 ?
Cs1 W1 Cs3 U1 102.97(4) . . . 4_656 ?
Cs3 W1 Cs3 U1 17.67(2) 4_556 . . 4_656 ?
Cs3 W1 Cs3 U1 -99.15(5) 1_455 . . 4_656 ?
U3 O9 Cs4 O15 37.4(6) . . . . ?
Cs2 O9 Cs4 O15 -172.3(3) 3_554 . . . ?
U3 O9 Cs4 O13 49.7(11) . . . 1_655 ?
Cs2 O9 Cs4 O13 -160.0(5) 3_554 . . 1_655 ?
U3 O9 Cs4 O22 125.0(6) . . . 1_655 ?
Cs2 O9 Cs4 O22 -84.8(3) 3_554 . . 1_655 ?
U3 O9 Cs4 O23 -84.0(7) . . . 1_655 ?
Cs2 O9 Cs4 O23 66.3(3) 3_554 . . 1_655 ?
U3 O9 Cs4 O21 179.5(7) . . . 3_554 ?
Cs2 O9 Cs4 O21 -30.3(2) 3_554 . . 3_554 ?
U3 O9 Cs4 O6 -29.9(6) . . . . ?
Cs2 O9 Cs4 O6 120.4(3) 3_554 . . . ?
U3 O9 Cs4 O17 92.5(6) . . . 1_554 ?
Cs2 O9 Cs4 O17 -117.3(3) 3_554 . . 1_554 ?
Cs2 O9 Cs4 U3 150.3(8) 3_554 . . . ?
U3 O9 Cs4 W2 -164.1(5) . . . 1_655 ?
Cs2 O9 Cs4 W2 -13.9(4) 3_554 . . 1_655 ?
U3 O9 Cs4 U1 105.2(10) . . . 1_655 ?
Cs2 O9 Cs4 U1 -104.6(9) 3_554 . . 1_655 ?
U3 O9 Cs4 U3 140.3(5) . . . 1_655 ?
Cs2 O9 Cs4 U3 -69.5(3) 3_554 . . 1_655 ?
U4 O15 Cs4 O9 -19.4(6) . . . . ?
Cs3 O15 Cs4 O9 169.5(3) 4 . . . ?
U4 O15 Cs4 O13 165.2(6) . . . 1_655 ?
Cs3 O15 Cs4 O13 -5.9(2) 4 . . 1_655 ?
U4 O15 Cs4 O22 -128.0(6) . . . 1_655 ?
Cs3 O15 Cs4 O22 61.0(3) 4 . . 1_655 ?
U4 O15 Cs4 O23 101.1(6) . . . 1_655 ?
Cs3 O15 Cs4 O23 -70.0(3) 4 . . 1_655 ?
U4 O15 Cs4 O21 -71.3(7) . . . 3_554 ?
Cs3 O15 Cs4 O21 117.6(3) 4 . . 3_554 ?
U4 O15 Cs4 O6 66.5(6) . . . . ?
Cs3 O15 Cs4 O6 -104.6(3) 4 . . . ?
U4 O15 Cs4 O17 -82.4(6) . . . 1_554 ?
Cs3 O15 Cs4 O17 106.6(3) 4 . . 1_554 ?
U4 O15 Cs4 U3 -7.9(5) . . . . ?
Cs3 O15 Cs4 U3 -179.0(3) 4 . . . ?
U4 O15 Cs4 W2 -166.8(3) . . . 1_655 ?
Cs3 O15 Cs4 W2 22.1(4) 4 . . 1_655 ?
U4 O15 Cs4 U1 170.7(5) . . . 1_655 ?
Cs3 O15 Cs4 U1 -0.3(2) 4 . . 1_655 ?
U4 O15 Cs4 U3 -138.2(5) . . . 1_655 ?
Cs3 O15 Cs4 U3 50.8(2) 4 . . 1_655 ?
U1 O6 Cs4 O9 22.4(4) . . . . ?
Cs1 O6 Cs4 O9 -100.8(3) . . . . ?
Cs3 O6 Cs4 O9 171.1(3) . . . . ?
U1 O6 Cs4 O15 -59.0(4) . . . . ?
Cs1 O6 Cs4 O15 177.7(3) . . . . ?
Cs3 O6 Cs4 O15 89.6(3) . . . . ?
U1 O6 Cs4 O13 -136.1(4) . . . 1_655 ?
Cs1 O6 Cs4 O13 100.7(3) . . . 1_655 ?
Cs3 O6 Cs4 O13 12.5(3) . . . 1_655 ?
U1 O6 Cs4 O22 -93.1(7) . . . 1_655 ?
Cs1 O6 Cs4 O22 143.7(5) . . . 1_655 ?
Cs3 O6 Cs4 O22 55.6(7) . . . 1_655 ?
U1 O6 Cs4 O23 152.9(5) . . . 1_655 ?
Cs1 O6 Cs4 O23 29.6(2) . . . 1_655 ?
Cs3 O6 Cs4 O23 -58.5(3) . . . 1_655 ?
U1 O6 Cs4 O21 69.4(6) . . . 3_554 ?
Cs1 O6 Cs4 O21 -53.8(5) . . . 3_554 ?
Cs3 O6 Cs4 O21 -141.9(3) . . . 3_554 ?
U1 O6 Cs4 O17 -31.9(5) . . . 1_554 ?
Cs1 O6 Cs4 O17 -155.1(2) . . . 1_554 ?
Cs3 O6 Cs4 O17 116.8(3) . . . 1_554 ?
U1 O6 Cs4 U3 13.1(4) . . . . ?
Cs1 O6 Cs4 U3 -110.1(2) . . . . ?
Cs3 O6 Cs4 U3 161.8(3) . . . . ?
U1 O6 Cs4 W2 155.2(3) . . . 1_655 ?
Cs1 O6 Cs4 W2 31.9(3) . . . 1_655 ?
Cs3 O6 Cs4 W2 -56.2(3) . . . 1_655 ?
U1 O6 Cs4 U1 -149.6(4) . . . 1_655 ?
Cs1 O6 Cs4 U1 87.16(19) . . . 1_655 ?
Cs3 O6 Cs4 U1 -1.0(3) . . . 1_655 ?
U1 O6 Cs4 U3 -136.5(3) . . . 1_655 ?
Cs1 O6 Cs4 U3 100.3(3) . . . 1_655 ?
Cs3 O6 Cs4 U3 12.1(6) . . . 1_655 ?
O22 U3 Cs4 O9 -178.2(9) . . . . ?
O14 U3 Cs4 O9 177.3(7) . . . . ?
O11 U3 Cs4 O9 25.5(7) . . . . ?
O3 U3 Cs4 O9 104.3(7) 1_554 . . . ?
O4 U3 Cs4 O9 -59.9(7) . . . . ?
O19 U3 Cs4 O9 -115.7(7) . . . . ?
W2 U3 Cs4 O9 -85.3(6) . . . . ?
U4 U3 Cs4 O9 142.0(6) . . . . ?
U1 U3 Cs4 O9 -153.1(6) . . . . ?
Cs1 U3 Cs4 O9 108.5(6) 1_454 . . . ?
Cs2 U3 Cs4 O9 -22.7(6) 3_554 . . . ?
O9 U3 Cs4 O15 -139.0(7) . . . . ?
O22 U3 Cs4 O15 42.8(7) . . . . ?
O14 U3 Cs4 O15 38.3(3) . . . . ?
O11 U3 Cs4 O15 -113.5(3) . . . . ?
O3 U3 Cs4 O15 -34.7(3) 1_554 . . . ?
O4 U3 Cs4 O15 161.1(3) . . . . ?
O19 U3 Cs4 O15 105.3(3) . . . . ?
W2 U3 Cs4 O15 135.65(19) . . . . ?
U4 U3 Cs4 O15 2.98(18) . . . . ?
U1 U3 Cs4 O15 67.91(18) . . . . ?
Cs1 U3 Cs4 O15 -30.49(19) 1_454 . . . ?
Cs2 U3 Cs4 O15 -161.76(19) 3_554 . . . ?
O9 U3 Cs4 O13 -150.8(7) . . . 1_655 ?
O22 U3 Cs4 O13 31.0(7) . . . 1_655 ?
O14 U3 Cs4 O13 26.5(4) . . . 1_655 ?
O11 U3 Cs4 O13 -125.2(4) . . . 1_655 ?
O3 U3 Cs4 O13 -46.4(4) 1_554 . . 1_655 ?
O4 U3 Cs4 O13 149.4(4) . . . 1_655 ?
O19 U3 Cs4 O13 93.6(4) . . . 1_655 ?
W2 U3 Cs4 O13 123.9(3) . . . 1_655 ?
U4 U3 Cs4 O13 -8.8(3) . . . 1_655 ?
U1 U3 Cs4 O13 56.2(3) . . . 1_655 ?
Cs1 U3 Cs4 O13 -42.2(3) 1_454 . . 1_655 ?
Cs2 U3 Cs4 O13 -173.5(3) 3_554 . . 1_655 ?
O9 U3 Cs4 O22 -61.4(7) . . . 1_655 ?
O22 U3 Cs4 O22 120.4(8) . . . 1_655 ?
O14 U3 Cs4 O22 115.9(3) . . . 1_655 ?
O11 U3 Cs4 O22 -35.8(3) . . . 1_655 ?
O3 U3 Cs4 O22 43.0(3) 1_554 . . 1_655 ?
O4 U3 Cs4 O22 -121.3(3) . . . 1_655 ?
O19 U3 Cs4 O22 -177.1(3) . . . 1_655 ?
W2 U3 Cs4 O22 -146.71(19) . . . 1_655 ?
U4 U3 Cs4 O22 80.62(19) . . . 1_655 ?
U1 U3 Cs4 O22 145.54(19) . . . 1_655 ?
Cs1 U3 Cs4 O22 47.14(19) 1_454 . . 1_655 ?
Cs2 U3 Cs4 O22 -84.12(19) 3_554 . . 1_655 ?
O9 U3 Cs4 O23 105.9(7) . . . 1_655 ?
O22 U3 Cs4 O23 -72.3(7) . . . 1_655 ?
O14 U3 Cs4 O23 -76.8(3) . . . 1_655 ?
O11 U3 Cs4 O23 131.4(3) . . . 1_655 ?
O3 U3 Cs4 O23 -149.8(3) 1_554 . . 1_655 ?
O4 U3 Cs4 O23 46.0(3) . . . 1_655 ?
O19 U3 Cs4 O23 -9.8(3) . . . 1_655 ?
W2 U3 Cs4 O23 20.56(19) . . . 1_655 ?
U4 U3 Cs4 O23 -112.11(19) . . . 1_655 ?
U1 U3 Cs4 O23 -47.19(19) . . . 1_655 ?
Cs1 U3 Cs4 O23 -145.59(19) 1_454 . . 1_655 ?
Cs2 U3 Cs4 O23 83.14(19) 3_554 . . 1_655 ?
O9 U3 Cs4 O21 -0.5(7) . . . 3_554 ?
O22 U3 Cs4 O21 -178.7(7) . . . 3_554 ?
O14 U3 Cs4 O21 176.8(3) . . . 3_554 ?
O11 U3 Cs4 O21 25.0(3) . . . 3_554 ?
O3 U3 Cs4 O21 103.8(3) 1_554 . . 3_554 ?
O4 U3 Cs4 O21 -60.4(3) . . . 3_554 ?
O19 U3 Cs4 O21 -116.2(3) . . . 3_554 ?
W2 U3 Cs4 O21 -85.83(18) . . . 3_554 ?
U4 U3 Cs4 O21 141.50(18) . . . 3_554 ?
U1 U3 Cs4 O21 -153.58(18) . . . 3_554 ?
Cs1 U3 Cs4 O21 108.02(18) 1_454 . . 3_554 ?
Cs2 U3 Cs4 O21 -23.24(18) 3_554 . . 3_554 ?
O9 U3 Cs4 O6 147.6(6) . . . . ?
O22 U3 Cs4 O6 -30.6(7) . . . . ?
O14 U3 Cs4 O6 -35.1(3) . . . . ?
O11 U3 Cs4 O6 173.1(3) . . . . ?
O3 U3 Cs4 O6 -108.1(2) 1_554 . . . ?
O4 U3 Cs4 O6 87.7(3) . . . . ?
O19 U3 Cs4 O6 31.9(3) . . . . ?
W2 U3 Cs4 O6 62.26(15) . . . . ?
U4 U3 Cs4 O6 -70.41(15) . . . . ?
U1 U3 Cs4 O6 -5.49(15) . . . . ?
Cs1 U3 Cs4 O6 -103.89(15) 1_454 . . . ?
Cs2 U3 Cs4 O6 124.85(15) 3_554 . . . ?
O9 U3 Cs4 O17 -78.6(6) . . . 1_554 ?
O22 U3 Cs4 O17 103.2(7) . . . 1_554 ?
O14 U3 Cs4 O17 98.7(3) . . . 1_554 ?
O11 U3 Cs4 O17 -53.1(3) . . . 1_554 ?
O3 U3 Cs4 O17 25.7(2) 1_554 . . 1_554 ?
O4 U3 Cs4 O17 -138.5(3) . . . 1_554 ?
O19 U3 Cs4 O17 165.7(3) . . . 1_554 ?
W2 U3 Cs4 O17 -163.94(15) . . . 1_554 ?
U4 U3 Cs4 O17 63.39(15) . . . 1_554 ?
U1 U3 Cs4 O17 128.31(15) . . . 1_554 ?
Cs1 U3 Cs4 O17 29.91(15) 1_454 . . 1_554 ?
Cs2 U3 Cs4 O17 -101.35(15) 3_554 . . 1_554 ?
O9 U3 Cs4 W2 21.6(6) . . . 1_655 ?
O22 U3 Cs4 W2 -156.6(7) . . . 1_655 ?
O14 U3 Cs4 W2 -161.1(3) . . . 1_655 ?
O11 U3 Cs4 W2 47.2(3) . . . 1_655 ?
O3 U3 Cs4 W2 126.0(2) 1_554 . . 1_655 ?
O4 U3 Cs4 W2 -38.2(2) . . . 1_655 ?
O19 U3 Cs4 W2 -94.1(2) . . . 1_655 ?
W2 U3 Cs4 W2 -63.70(5) . . . 1_655 ?
U4 U3 Cs4 W2 163.63(5) . . . 1_655 ?
U1 U3 Cs4 W2 -131.45(5) . . . 1_655 ?
Cs1 U3 Cs4 W2 130.15(4) 1_454 . . 1_655 ?
Cs2 U3 Cs4 W2 -1.11(4) 3_554 . . 1_655 ?
O9 U3 Cs4 U1 -143.5(6) . . . 1_655 ?
O22 U3 Cs4 U1 38.2(7) . . . 1_655 ?
O14 U3 Cs4 U1 33.8(3) . . . 1_655 ?
O11 U3 Cs4 U1 -118.0(3) . . . 1_655 ?
O3 U3 Cs4 U1 -39.2(2) 1_554 . . 1_655 ?
O4 U3 Cs4 U1 156.6(2) . . . 1_655 ?
O19 U3 Cs4 U1 100.8(2) . . . 1_655 ?
W2 U3 Cs4 U1 131.15(10) . . . 1_655 ?
U4 U3 Cs4 U1 -1.52(9) . . . 1_655 ?
U1 U3 Cs4 U1 63.40(9) . . . 1_655 ?
Cs1 U3 Cs4 U1 -35.00(11) 1_454 . . 1_655 ?
Cs2 U3 Cs4 U1 -166.27(10) 3_554 . . 1_655 ?
O9 U3 Cs4 U3 -48.9(6) . . . 1_655 ?
O22 U3 Cs4 U3 132.9(7) . . . 1_655 ?
O14 U3 Cs4 U3 128.4(3) . . . 1_655 ?
O11 U3 Cs4 U3 -23.3(3) . . . 1_655 ?
O3 U3 Cs4 U3 55.5(2) 1_554 . . 1_655 ?
O4 U3 Cs4 U3 -108.7(2) . . . 1_655 ?
O19 U3 Cs4 U3 -164.6(2) . . . 1_655 ?
W2 U3 Cs4 U3 -134.20(3) . . . 1_655 ?
U4 U3 Cs4 U3 93.13(4) . . . 1_655 ?
U1 U3 Cs4 U3 158.05(4) . . . 1_655 ?
Cs1 U3 Cs4 U3 59.65(5) 1_454 . . 1_655 ?
Cs2 U3 Cs4 U3 -71.61(4) 3_554 . . 1_655 ?
 
_diffrn_measured_fraction_theta_max    0.999
_diffrn_reflns_theta_full              27.88
_diffrn_measured_fraction_theta_full   0.999
_refine_diff_density_max    2.018
_refine_diff_density_min   -2.942
_refine_diff_density_rms    0.489
